# Supplementary material for: Asylum seekers health and wellbeing (TERTTU) survey: study protocol for a prospective total population health examination survey on the health and service needs of newly arrived asylum seekers in Finland
Source: PubMed Central journal article supplement — BMJ Open. 2019 Apr 8;9(4):e027917. doi: 10.1136/bmjopen-2018-027917 (PMC6500271; doi:10.1136/bmjopen-2018-027917), 2019-04-08
Supplement: bmjopen-2018-027917.draft_revisions.pdf [file bmjopen-2018-027917.draft_revisions.pdf]

# BMJ Open

BMJ Open is committed to open peer review. As part of this commitment we make the peer review history of every article we publish publicly available.

When an article is published we post the peer reviewers' comments and the authors' responses online. We also post the versions of the paper that were used during peer review. These are the versions that the peer review comments apply to.

The versions of the paper that follow are the versions that were submitted during the peer review process. They are not the versions of record or the final published versions. They should not be cited or distributed as the published version of this manuscript.

BMJ Open is an open access journal and the full, final, typeset and author-corrected version of record of the manuscript is available on our site with no access controls, subscription charges or pay-per-view fees (<http://bmjopen.bmj.com>).

If you have any questions on BMJ Open's open peer review process please email [info.bmjopen@bmj.com](mailto:info.bmjopen@bmj.com)

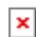

**The Asylum Seekers Health and Wellbeing (TERTTU)  
Survey: a total population prospective study on the health  
and service needs of newly arrived asylum seekers.**

|                               |                                                                                                                                                                                                                                                                                                                                                                                                                                                                                                                  |
|-------------------------------|------------------------------------------------------------------------------------------------------------------------------------------------------------------------------------------------------------------------------------------------------------------------------------------------------------------------------------------------------------------------------------------------------------------------------------------------------------------------------------------------------------------|
| Journal:                      | <i>BMJ Open</i>                                                                                                                                                                                                                                                                                                                                                                                                                                                                                                  |
| Manuscript ID                 | bmjopen-2018-027917                                                                                                                                                                                                                                                                                                                                                                                                                                                                                              |
| Article Type:                 | Protocol                                                                                                                                                                                                                                                                                                                                                                                                                                                                                                         |
| Date Submitted by the Author: | 14-Nov-2018                                                                                                                                                                                                                                                                                                                                                                                                                                                                                                      |
| Complete List of Authors:     | Skogberg, N. ; National Institute for Health and Welfare, Helsinki, Finland, Welfare<br>Koponen, Päivikki; National Institute for Health and Welfare, Public Health Solutions<br>Tiittala, Paula; National Institute for Health and Welfare<br>Mustonen, Katri-Leena; National Institute for Health and Welfare, Welfare<br>Lilja, Eero; National Institute for Health and Welfare, Welfare<br>Snellman, Olli; Finnish Immigration Service<br>Castaneda, Anu; National Institute for Health and Welfare, Welfare |
| Keywords:                     | Organisation of health services < HEALTH SERVICES ADMINISTRATION & MANAGEMENT, EPIDEMIOLOGY, Protocols & guidelines < HEALTH SERVICES ADMINISTRATION & MANAGEMENT, asylum seeker and refugee health, Health policy < HEALTH SERVICES ADMINISTRATION & MANAGEMENT                                                                                                                                                                                                                                                 |
|                               |                                                                                                                                                                                                                                                                                                                                                                                                                                                                                                                  |

SCHOLARONE™  
Manuscripts

1  
2  
3 **The Asylum Seekers Health and Wellbeing (TERTTU) Survey: a total population prospective study on the**  
4 **health and service needs of newly arrived asylum seekers.**  
5  
6

7  
8 Natalia Skogberg<sup>a\*</sup>, Päivikki Koponen<sup>b</sup>, Paula Tiittala<sup>c</sup>, Katri-Leena Mustonen<sup>a</sup>, Eero Lilja<sup>a</sup>, Olli Snellman<sup>d</sup>, Anu  
9 Castaneda<sup>a</sup>.  
10

11  
12  
13 [the surname of each author is underlined]  
14

15  
16  
17  
18  
19 <sup>a</sup>Department of Welfare, National Institute for Health and Welfare, Helsinki, Finland.  
20

21 <sup>b</sup>Department of Public Health Solutions, National Institute for Health and Welfare, Helsinki, Finland;  
22

23 <sup>c</sup>Department of Health Security, National Institute for Health and Welfare, Helsinki, Finland;  
24

25 <sup>d</sup>Finnish Immigration Service, Helsinki, Finland.  
26  
27

28  
29  
30 \*Corresponding author: Natalia Skogberg, Department of Welfare, National Institute for Health and  
31 Welfare; Mannerheimintie 166, PL 30, 00271 Helsinki, Finland; e-mail: natalia.skogberg@thl.fi; telephone:  
32 +358295247916; fax: +358295246111.  
33  
34  
35

36  
37  
38 Keywords: organization of health services, health policy, protocols and guidelines, epidemiology, asylum  
39 seeker and refugee health  
40  
41  
42  
43  
44  
45

46 Word count abstract: 255 words  
47

48  
49 Word count main text: 3806 words  
50  
51  
52  
53  
54  
55  
56  
57  
58  
59  
60

## Abstract

### Introduction

Health, wellbeing and health service needs of asylum seekers have emerged as urgent topics following the arrival of 2.5 million asylum seekers to EU between 2015 and 2016. However, representative information on the health, wellbeing and service needs of asylum seekers is scarce. The aim of the Asylum Seekers Health and Wellbeing (TERTTU) Survey is to 1) gather population-based representative information; 2) identify key indicators for systematic monitoring; 3) produce the evidence-base for development of systematic screening of asylum seekers health, wellbeing and health service needs.

### Methods and analysis

TERTTU Survey is a population-based prospective study with a total population sample of newly arrived asylum seekers to Finland, including adults and children. Baseline data collection is carried out in reception centres in 2018 and consists of a face-to-face interview, self-administered questionnaire and a health examination following a standardised protocol. Altogether 1000 asylum seekers will be included into the study. Baseline data will be followed up with national electronic health record data encompassing the entire asylum process and later with national register data among persons who are granted asylum.

### Ethics and dissemination

Ethical approval has been granted by the Coordinating Ethics Committee of the Helsinki and Uusimaa Hospital District. Participation is voluntary and based on written informed consent. Results will be widely disseminated on a national and international level to inform health and welfare policy as well as development of services for asylum seekers. Results of the study will constitute the evidence base for national-level development of the current initial health assessment for asylum seekers.

1  
2  
3  
4  
5  
6  
7  
8  
9  
10  
11  
12  
13  
14  
15  
16  
17  
18  
19  
20  
21  
22  
23  
24  
25  
26  
27  
28  
29  
30  
31  
32  
33  
34  
35  
36  
37  
38  
39  
40  
41  
42  
43  
44  
45  
46  
47  
48  
49  
50  
51  
52  
53  
54  
55  
56  
57  
58  
59  
60

## Strengths and limitations

- This is the first population-based face-to-face interview and health examination survey among newly arrived asylum seekers.
- The findings of the study will be used for identifying key indicators for health monitoring and will also produce unique information on the health status and health service needs of asylum seekers from the very early point of arrival to Finland.
- With participants' informed consent their baseline survey data will be supplemented with register-based follow-up data on the health and later service use of asylum seekers over the course of the asylum process.
- If feasible, those who have been granted asylum will be followed-up using national register-based data to examine the influence of migration-related factors on long-term trajectories of health and integration.
- Studying newly arrived asylum seekers poses methodological and logistical challenges as well as requires ability for quick responses in a rapidly changing setting.

## 1 Introduction

The peak in asylum applications to Europe between 2015 to 2016 highlighted the need for developing more effective policies for meeting both urgent and long-term healthcare needs of asylum seekers (1,2). An asylum seeker is defined based on their legal status as a person who has applied for international protection and is waiting for a decision on legal asylum, as opposed to a refugee who has already been granted legal asylum (3). Representative population-based information on the health and wellbeing of asylum seekers is needed to guide decision-making and planning of healthcare services for asylum seekers (1). Such information is, however, limited in Europe.

Previous studies have focused mainly on one area of health or wellbeing among asylum seekers, for example on infectious diseases (4), mental health (5), access to healthcare services (6) and human capital (7). These studies are generally limited in generalizability to the entire asylum seeker population in the given country due to sample size restrictions and sampling methodology. A further common limitation in previous studies is that asylum seekers and refugees are examined as one group. No previous studies among newly arrived asylum seekers including a nationally representative population-based sample and with standardised objective health examination measures have been identified. In Finland, current information on the health and wellbeing of asylum seekers is limited mainly to infectious disease screening (8) and access to healthcare and social services (9). More information is available on the health and wellbeing of persons of refugee origin that have a permanent residence status in Finland. Based on these studies, persons of refugee background have been found to be at a particular disadvantage with respect to a number of health outcomes, including a high incidence of chronic disease risk factors (10), mobility limitations (11) and poor mental health (12).

The Asylum Seekers Health and Wellbeing (TERTTU) Survey gathers systematic and representative interview and health examination data on the health, wellbeing and health service needs of newly arrived asylum seekers in Finland. The study is implemented as a part of an EU Asylum, Migration and Integration Fund project aiming at developing evidence-based health examination protocol for newly arrived asylum

1  
2  
3 seekers (13). The key purpose of the TERTTU Survey is to produce the evidence base for development of  
4  
5 the current initial health assessment protocol. The TERTTU Survey is conducted in collaboration with the  
6  
7 Finnish Immigration Service and the reception centres.  
8  
9

10 The Finnish Immigration Service under the Ministry of Interior is responsible for regulation, organisation,  
11  
12 steering, supervision and funding of sheltering and health services for asylum seekers. Reception centres  
13  
14 are the main providers of health care services for asylum seekers. Close collaboration with stakeholders  
15  
16 (Finnish immigration Service and reception centres) allows for a unique opportunity for direct  
17  
18 implementation of research findings into practice. Evidence-based development of the health examination  
19  
20 protocol will promote equality in the access and quality of services provided for asylum seekers. Correct  
21  
22 and timely identification of vulnerable populations as well as persons in need of services have significant  
23  
24 impact on the immediate and long-term health of asylum seekers. Furthermore, it facilitates optimising of  
25  
26 existing resources in healthcare provision.  
27  
28  
29

30  
31 The TERTTU Survey will produce population-based data on disease burden and service use of asylum  
32  
33 seekers that will strengthen asylum seekers health monitoring at a national level. TERTTU Survey data will  
34  
35 be used for identification of key indicators for systematic monitoring of asylum seekers health at a national  
36  
37 level. In addition to direct implementation of research findings to the practical development of the health  
38  
39 examination protocol, the TERTTU Survey will also generate a large amount of data that can be used for  
40  
41 designing various health promotion measures in reception centres. Participants in the baseline TERTTU  
42  
43 Survey will be followed up using register-based data. Register-linkage will provide with a unique  
44  
45 opportunity to examine trajectories of health of asylum seekers from the very early stages of arrival to  
46  
47 Finland.  
48  
49  
50  
51  
52  
53  
54  
55  
56  
57  
58  
59  
60

## 2 Methods and analysis

The TERTTU Survey is coordinated by the Equality and Inclusion Unit of the National Institute for Health and Welfare, Finland. A multidisciplinary consortium was formed at the planning stage of the survey consisting of experts from different departments and units of the National Institute for Health and Welfare as well as from other collaborating bodies such as regional authorities, universities, non-governmental organisations and experts working in clinical practice. Conceptual framework of the TERTTU Survey is presented in Figure 1. Asylum seekers may arrive at any life stage and their health and wellbeing are influenced by pre-migration, migration process-related and post migration experiences. Sociodemographic and socioeconomic factors mediate the influence of migration-related factors and other exposures throughout the life course. Authorities and institutions regulating the asylum process have a central impact on health outcomes of asylum seekers through defining the rights for services and quality criteria for the services provided to asylum seekers.

[Figure 1 about here]

Asylum seekers are designated to a reception centre which is responsible for coordinating services. Therefore, planning and implementation of the survey were conducted in close collaboration with the Finnish Immigration Service and the transit reception centres in the cities of Helsinki, Oulu, Joutseno and Turku. Stages of the TERTTU Survey are outlined in Table 1.

[Table 1 about here]

Data collection of the TERTTU Survey is implemented by eight trained multilingual research nurses. In addition to having a good command of Finnish, languages spoken by research nurses include English, Arabic, Somali, Persian, Dari, Sorani dialect of Kurdish, Urdu, Russian, Portuguese and French. These languages have been the most common languages spoken by asylum seekers arriving to Finland over the previous years. All of the study material given to the participants (including information leaflets and consent forms), have been translated into English, Arabic, Somali, Persian, Sorani dialect of Kurdish and



1  
2  
3 Russian. Material is translated into additional languages over the course of the survey if needed. If the  
4  
5 study participant speaks another language than the ones spoken by research nurses, a professional  
6  
7 interpreter is used. Professional interpreters are used from accredited companies and are briefed  
8  
9 concerning the importance of standardised protocol.  
10  
11  
12  
13  
14  
15

## 16 **2.1 Study population**

17  
18  
19 The study population includes all newly arrived asylum seekers, who have applied for asylum for the first  
20  
21 time in Finland. Exclusion criteria are persons who: 1) reside in a detention centre; 2) have applied for  
22  
23 asylum in another country and are transferred to Finland based on international agreements (internal  
24  
25 transfer); 3) have been returned to Finland according to the Dublin regulation; 4) have previously had a  
26  
27 residence permit in Finland and have now for some reason applied for an asylum; 5) babies born in Finland  
28  
29 to asylum seeking parents who have already stayed in Finland for a longer period of time. New asylum  
30  
31 seekers arrive to Finland spontaneously and the number of new arrivals varies on a weekly basis.  
32  
33 Participants are recruited into the study approximately two weeks following registration of their asylum  
34  
35 application in Finland. Such sampling frame requires continuous sampling of study participants compared  
36  
37 with retrospective sampling that is generally used in health interview and health examination surveys.  
38  
39 There are approximately 40-60 new asylum applications a week fitting the selection criteria of the study,  
40  
41 which enables inclusion of the total population sample into the study.  
42  
43  
44  
45

46  
47 Both adults and children are invited to participate in the study. This enables to link family members. The  
48  
49 population-based sample is drawn on a weekly basis from an electronic database containing data on all  
50  
51 asylum seekers in Finland and maintained by the Finnish Immigration Services. Each asylum seeker receives  
52  
53 a unique identity number that is used throughout the asylum seeking process. Additional registered  
54  
55 information includes date of the asylum application, name, sex, date and country of birth, nationality,  
56  
57 mother tongue and desired language of the interpreter services.  
58  
59  
60

## 2.2 Recruitment of study participants

Currently (2018), there are altogether 49 reception centres in Finland, out of which 43 are for adults and families and 6 for unaccompanied minors. The number of reception centres varies depending on the number of asylum applications and the speed of the decision processes. A substantial majority of adults and families are initially directed to transit reception centres, where they wait for the asylum interview. Transit reception centres are located in Helsinki (capital of Finland), Turku, Joutseno and Oulu (Figure 2). Some newly arrived asylum seekers arrange private housing for themselves. In such case, they are allocated to the geographically closest reception centre for provision of health and social services throughout the asylum process. Unaccompanied minors are usually directed to units for minors, where they remain throughout the entire asylum process. Since participants of the TERTTU Survey are recruited at an early stage of the asylum process, transit reception centres are the permanent study sites. However since the TERTTU Survey is based on a total population sample, the survey is conducted in any other national reception centres depending on where the persons included into the study sample are situated.

[Figure 2 about here]

Recruitment of study participants in transit reception centres is outlined in Figure 3. Recruitment is the responsibility of the research nurse. However, reception centre personnel have a central role in facilitating the initial contact between the research nurse and persons belonging to the study sample. An invitation with a set time for a reach-out appointment with the research nurse and a brief information leaflet are delivered to asylum seekers by reception centre personnel. The information leaflet is available in the study languages and is designed to be understandable even with limited language or literacy skills. [Link to Supplement Figure 1]

[Figure 3 about here]

The purpose of the reach-out appointment is that the research nurse makes personal contact with the persons invited to participate in the study. By providing information on the aims and content of the study,

1  
2  
3 the research nurse ensures that the person invited to participate has sufficient information to give  
4 informed consent for participation. Booking a reach-out time is the only possibility for personal contact as  
5 no telephone numbers are available for newly-arrived asylum seekers and research nurses do not have  
6 access to the living areas of the reception centres due to security regulations. If the asylum seeker does not  
7 arrive to their reach-out appointment, the research nurse requests the reception centre's social counselors  
8 to see if the person is in their dorm. If the person is on the premises of the reception centre, they are asked  
9 to come to the reception desk and talk with the research nurse. Otherwise, a new reach-out appointment is  
10 booked up to three times, unless the person expresses explicit decline from participation to reception  
11 centre personnel.  
12  
13

14  
15  
16  
17  
18  
19  
20  
21  
22  
23  
24 Asylum seekers living in other reception centres or in private housing are also approached through the  
25 reception centre as no personal contact information is initially available. The research nurse or the project  
26 coordinator contact the reception centre director via e-mail and explain the purpose of the study. Following  
27 this, the research nurse contacts the reception centre for specific arrangements. Telephone contact  
28 information is usually available for persons living in private housing and in such case the research nurse  
29 contacts persons invited to participate directly by telephone. In case of unaccompanied minors, the initial  
30 contact is with the reception centre to enquire for contact details of the legal guardian, who is approached  
31 by e-mail or by telephone by the research coordinator. If the legal guardian gives consent, the  
32 unaccompanied minor is contacted and invited to participate in the study.  
33  
34  
35  
36  
37  
38  
39  
40  
41  
42  
43  
44

45 Two hours are booked in the research nurses schedule for each reach out time, which allows for conduct of  
46 the study straight away if the person agrees to participate. Alternatively, another time is agreed upon. Prior  
47 to starting the interview and the health examination, the research nurse confirms the identity of the  
48 participant by checking their personal identification card. Participants are provided with detailed written  
49 information about the study, including the purpose of the study, how the collected information will be  
50 used, data protection, the rights of participants and who is responsible for conduct of the study. If written  
51 information is not available in the language spoken by the asylum seeker or the person is illiterate, the  
52  
53  
54  
55  
56  
57  
58  
59  
60

1  
2  
3 research nurse goes through written information with assistance of the professional interpreter. The  
4  
5 purpose of the study is explained to minors in an age-appropriate manner.  
6  
7

8 Participants are asked to sign written informed consent. Separate consent is acquired for: 1) the use of the  
9  
10 data for research and development purposes within the National Institute for Health and Welfare; 2)  
11  
12 sharing anonymised data with researchers outside the institute; 3) record linkage of electronic patient  
13  
14 register data to survey data; 4) record linkage of national register data to survey data if asylum is granted in  
15  
16 Finland. Guardians of minors sign informed consent. Additionally, children aged 7 years and older also give  
17  
18 written informed consent. The consent form is designed in age-appropriate manner.  
19  
20  
21  
22  
23  
24  
25

### 26 **2.3 Power and data analysis**

27  
28 The aim is to gather data on a minimum of 1000 newly arrived asylum seekers. Of the 1000 participants,  
29  
30 the projected sample sizes in each age group are 700 for adults and 100 for each of the minor groups (0-6  
31  
32 years, 7-12 years and 13-17 years). An estimate for a sample of 700 would have a confidence interval of  
33  
34 roughly  $\pm 3.5\%$ , and  $\pm 5\%$  when examined by sex ( $n=350$ ). A sample of 100 for each minor age group would  
35  
36 result to confidence intervals of  $\pm 10\%$  or less. Projected confidence intervals will produce estimates of  
37  
38 adequate accuracy (14).  
39  
40  
41  
42

43 Data on adults will be analysed by country or region of origin depending on the final group size. When  
44  
45 statistically feasible, analyses will also be stratified by sex. Data on minors will be analysed divided into  
46  
47 three age groups. Analyses will be conducted to take into account non-response. The effect of non-  
48  
49 response will be assessed based on register data including age, sex and country of origin. Based on these  
50  
51 analyses, sample weights will be calculated if necessary to correct for the effect of non-response.  
52  
53  
54

55 Data will be examined using mean and median values and proportions. Linear regression will be applied to  
56  
57 continuous variables, logistic regression to binary variables and multivariable linear regression to  
58  
59 categorical variables. When feasible, findings of the TERTTU Survey will be compared with data of other  
60

1  
2  
3 national population-based studies. In these cases, adjustment for age and sex will be applied. Total  
4  
5 population sampling allows for examining family units. This provides with a unique opportunity to examine  
6  
7 how the health, wellbeing and health service needs of for example parents influence those of their  
8  
9 children.  
10

#### 16 **2.4 Data collection**

17  
18  
19 The study consists of a standardised face-to-face interview and a health examination. Duration of the study  
20  
21 is approximately 1 hour if conducted in the mother tongue of the participant and approximately 2 hours if  
22  
23 an interpreter is used. Some of the questions concerning mental health as well as sexual and reproductive  
24  
25 health can be completed as self-administered questionnaires during the interview. The research nurse  
26  
27 records whether these were interviewed or self-completed by the participants. Interviews and health  
28  
29 examinations have been tailored for four age groups: 1) adults; 2) 13-17 year-olds; 3) 7-12 year-olds and 4)  
30  
31 0-6 years. Adults and 13-17 year-olds provide their own answers for the interview, whereas the guardians  
32  
33 of 0-12 year-olds answer to the interview questions concerning children. Minors aged 0-12 years  
34  
35 participate only in the health examination. Research nurses received extensive training over the course of  
36  
37 eight days on research methods, purpose and content of the study, interview techniques as well as on  
38  
39 conduct of standardised interview and health examination. Quality control of data collection is also  
40  
41 monitored at different stages of data collection following the European Health Examination Survey (EHES)  
42  
43 fieldwork quality control guidelines (15).  
44  
45  
46  
47  
48  
49  
50  
51  
52  
53  
54  
55  
56  
57  
58  
59  
60

### ***Face-to-face interview***

The face-to-face interview consists of measures used for assessment of the health, wellbeing, service needs of asylum seekers as well as for identification of vulnerable populations. Use of simple language was taken into account. When appropriate, selected measures are comparable with those used in other population-based surveys conducted among the general population as well as among populations of migrant origin permanently living in Finland. The content of the interview by age group is outlined in Table 2. The themes covered in the interview for adults include sociodemographics, asylum seeking journey, literacy, previous socioeconomic status, health status, sexual and reproductive health, traumatic events, mental health, health behaviour and social networks. The interview for children under the age of 18 covers similar themes when relevant. Additionally, early childhood and development are also covered.

[Table 2 about here]

### ***Health examination***

Health examination measurements are carried out following EHES protocol (15). The content of the health examination is outlined in Table 3. The health examination of adults and 13-17 year-olds consists of standardised measurements of weight, height, waist circumference, upper arm circumference, blood pressure, and a dental examination. For children belonging to the 7-12 years age group, health examination consists of measurements of weight and height, dental examination and evaluation of condition of the skin. The health examination of children aged 0-6 years consists of evaluation of the condition of the skin and examination for Bacillus Calmette-Guérin (BCG) scar.

[Table 3 about here]

1  
2  
3  
4  
5  
6  
7  
8  
9  
10  
11  
12  
13  
14  
15  
16  
17  
18  
19  
20  
21  
22  
23  
24  
25  
26  
27  
28  
29  
30  
31  
32  
33  
34  
35  
36  
37  
38  
39  
40  
41  
42  
43  
44  
45  
46  
47  
48  
49  
50  
51  
52  
53  
54  
55  
56  
57  
58  
59  
60

### ***Linkage with register-based data***

Upon separate consent, data collected during the TERTTU Survey can be supplemented with unified national electronic health record (EHR) data of the reception centres on the basis of the unique personal identity number. This allows for following the health of asylum seekers from the initial point of arrival to Finland throughout the entire reception processes. Upon a separate consent, data collected during the TERTTU Survey can be supplemented with data from the national registers on the health, wellbeing and health service use of those who have been granted an asylum (Table 4). Feasibility of this record linkage will be evaluated after a follow-up period. Record linkage with national registers provides with a unique opportunity to examine how the health of asylum seekers evolves throughout their life course.

[Table 4 about here]

### ***Linkage with biological data from the ROKOIMMU Study***

Parallel to the TERTTU Survey, a cross-sectional Immunity against vaccine preventable diseases (ROKOIMMU) Study is conducted between 2018 and 2019. The aim of the ROKOIMMU Study is to assess previous immunity against measles, mumps, rubella, diphtheria, tetanus and polio among asylum seekers coming from countries with higher incidence of vaccine preventable diseases (16). The ROKOIMMU Study recruits all asylum seekers from Afganistan, Iraq, Russia and Somalia who have not yet received vaccines in Finland, with the aim of gathering a minimum 100 samples per each study group. The blood samples are drawn in connection with the voluntary multiphasic screening for blood-borne and sexually transmitted infections currently offered to all asylum seekers during the initial health assessment. Nurses working in transit centers are responsible for recruitment of study participants. Participants provide written informed consent. Upon a separate consent, results from the ROKOIMMU Study can be linked with information on sociodemographics and self-reported history of vaccinations collected during the TERTTU Survey. The ROKOIMMU Study is coordinated by the National Institute for Health and Welfare and funded by the

1  
2  
3 National Vaccination Program. The ROKOIMMU Study has been approved by the Coordinating Ethics  
4  
5 Committee of the Helsinki and Uusimaa Hospital District (HUS/3330/2017).  
6  
7  
8  
9

## 10 11 **2.5 Patient and Public Involvement** 12

13  
14 The study was designed to fill the gap in knowledge on the health, wellbeing and health service use among  
15  
16 asylum seekers. The study was designed consulting a consortium of experts on the topic of the health and  
17  
18 wellbeing of asylum seekers. Persons with asylum seeker background were included into the steering  
19  
20 committee and have provided their insights on the content of the study. No patients were directly involved  
21  
22 in recruitment or conduct of the study. Results of the study benefit participants in that they receive  
23  
24 information on their health and are consulted to seek further medical advice if a need for such is identified  
25  
26 over the course of the study. Results will be disseminated in reception centres and through media and  
27  
28 reports on a national level.  
29  
30  
31  
32  
33  
34  
35  
36

## 37 **3 Ethics and Dissemination** 38

### 39 *Ethical aspects* 40 41

42  
43 Participation in the TERTTU Survey is based on voluntary informed written consent. Participants are  
44  
45 informed concerning personal data protection, sovereignty of the study in terms of the person's asylum  
46  
47 seeking process and confidentiality of the answers. It is made clear that the TERTTU Survey does not  
48  
49 substitute the initial health assessment provided by the reception centres. Furthermore, participants are  
50  
51 informed that they are fully entitled to decline from participation or interrupt participation at any moment  
52  
53 without the need for providing a reason and that they are also entitled to request deletion of their data.  
54  
55 Participants are also informed that they are entitled to leave some questions unanswered and that they  
56  
57 may refuse any measurement.  
58  
59  
60



1  
2  
3 All of the data is collected during a one-on-one research appointment. None of the data collected during  
4  
5 the study is shared with a third person (for example spouse, parent of 13-17 year-olds who participate  
6  
7 independently, or reception centre personnel). Research nurses are bound by a confidentiality clause and  
8  
9 have been trained in key principles of research ethics. Professional interpreters provide their services via  
10  
11 the telephone, which provides a higher degree of confidentiality for the participant.  
12  
13

14  
15 Participants are given oral and written feedback on their health examination measures. If a need for further  
16  
17 health care services arises over the course of the survey visit, research nurses recommend participants to  
18  
19 contact the reception centre nurse. All of the TERTTU Survey data is managed following the National  
20  
21 Institute for Health and Welfare's protocol for handling sensitive data. Each study participant is given a  
22  
23 random study ID number and data is handled without personal identification information.  
24  
25

26  
27 Incentives (for example bus cards, toy packages for children) valued at approximately 10 euros are given to  
28  
29 all participants. The TERTTU Survey has been approved by the Coordinating Ethics Committee of the  
30  
31 Helsinki and Uusimaa Hospital District (reference number HUS/3306/2017).  
32  
33

### 34 35 36 37 ***Dissemination of information about the TERTTU Survey***

38  
39  
40 Information about the TERTTU Survey is broadly disseminated both at national and international level at all  
41  
42 stages of the study. Since the TERTTU Survey has been specifically designed to bridge the gap in knowledge  
43  
44 on the health and wellbeing of asylum seekers in Finland, Ministry of Interior, Ministry of Social Welfare  
45  
46 and Health and Ministry of Economic Affairs and Employment are regularly updated on the progress of the  
47  
48 study and these updates are transferred into various country reports compiled by the ministries. The  
49  
50 TERTTU Survey has been presented to a number of international collaborators and at several international  
51  
52 congresses. Possibilities for research collaboration with international partners will be explored.  
53  
54

55  
56  
57 The main findings of the baseline TERTTU Survey will be reported by the end of summer 2019 and they will  
58  
59 be widely disseminated at both national and international level. Following this, TERTTU Survey data will be  
60

1  
2  
3 available for research purposes upon an accepted study proposal. Evidence-based health examination  
4  
5 protocol will be developed and disseminated across reception centres on a national level by the end of  
6  
7 2019.  
8  
9

## 10 11 12 13 14 **Acknowledgements** 15

16  
17  
18 The authors would like to acknowledge experts at the Finnish Immigration Service and all of the personnel  
19  
20 of collaborating reception centres for their substantial efforts in facilitating implementation of the study. All  
21  
22 of the participants in the study, the research nurses involved in baseline data collection, the  
23  
24 multidisciplinary consortium of experts from the National Institute for Health and Welfare and  
25  
26 collaborating bodies as well as the steering committee of the Developing the health examination protocol  
27  
28 for asylum seekers in Finland project also need to be acknowledged. Finally, the authors would like to  
29  
30 acknowledge Sinikka Kytö and Kaaren Erhola for the graphical visualization of the TERTTU Survey material.  
31  
32  
33  
34  
35  
36  
37  
38  
39  
40  
41

## 42 43 44 45 46 47 48 49 50 51 **Author contributions** 52

53  
54  
55 AC and OS conceptualised the initial idea for the national-level project aiming at developing the health  
56  
57 examination protocol for asylum seekers in Finland within which the TERTTU Survey is implemented. AC  
58  
59 developed the original grant proposal. NS prepared the first draft of the manuscript. All authors have  
60  
provided critical feedback and contributed to revision of the manuscript. All authors have read and  
approved the final manuscript.

1  
2  
3  
4  
5  
6  
7  
8  
9  
10  
11  
12  
13  
14  
15  
16  
17  
18  
19  
20  
21  
22  
23  
24  
25  
26  
27  
28  
29  
30  
31  
32  
33  
34  
35  
36  
37  
38  
39  
40  
41  
42  
43  
44  
45  
46  
47  
48  
49  
50  
51  
52  
53  
54  
55  
56  
57  
58  
59  
60

**Funding**

TERTTU Survey is implemented as a part of the Developing the health examination protocol for asylum seekers in Finland: A national development project funded by the EU Asylum, Migration and Integration Fund.

**Competing interests**

None

For peer review only

## References

- (1) Bozorgmehr K, Goosen S, Mohsenpour A, Kuehne A, Razum O, Kunst AE. How Do Countries' Health Information Systems Perform in Assessing Asylum Seekers' Health Situation? Developing a Health Information Assessment Tool on Asylum Seekers (HIATUS) and Piloting It in Two European Countries. *Int J Environ Res Public Health* 2017 Aug 8;14(8):10.3390/ijerph14080894.
- (2) Bozorgmehr K, Razum O. Forced Migration and Global Responsibility for Health Comment on "Defining and Acting on Global Health: The Case of Japan and the Refugee Crisis". *Int J Health Policy Manag* 2016 Nov 5;6(7):415-418.
- (3) European Union. Who qualifies for international protection. 2018. Accessed on June 1, 2018 from: [https://ec.europa.eu/home-affairs/what-we-do/policies/asylum/refugee-status\\_en](https://ec.europa.eu/home-affairs/what-we-do/policies/asylum/refugee-status_en).
- (4) Alberer M, Malinowski S, Sanftenberg L, Schelling J. Notifiable infectious diseases in refugees and asylum seekers: experience from a major reception center in Munich, Germany. *Infection* 2018 Jun;46(3):375-383.
- (5) Melamed S, Chernet A, Labhardt ND, Probst-Hensch N, Pfeiffer C. Social Resilience and Mental Health Among Eritrean Asylum-Seekers in Switzerland. *Qual Health Res* 2018 Sep 15:1049732318800004.
- (6) Bozorgmehr K, Schneider C, Joos S. Equity in access to health care among asylum seekers in Germany: evidence from an exploratory population-based cross-sectional study. *BMC Health Serv Res* 2015 Nov 9;15:502-015-1156-x.
- (7) Buber-Ennser I, Kohlenberger J, Rengs B, Al Zalak Z, Goujon A, Striessnig E, et al. Human Capital, Values, and Attitudes of Persons Seeking Refuge in Austria in 2015. *PLoS One* 2016 Sep 23;11(9):e0163481.
- (8) Tiittala P, Tuomisto K, Puumalainen T, Lyytikäinen O, Ollgren J, Snellman O, et al. Public health response to large influx of asylum seekers: implementation and timing of infectious disease screening. *BMC Public Health* 2018 Sep 24;18(1):1139-018-6038-9.
- (9) Tiittala P SE. Asylum seekers' access to mental health and dental health services, and prevention of infection disease problems in Finland in 2017. Research brief 10 National Institute for Health and Welfare, Helsinki, Finland 2018.
- (10) Skogberg N, Laatikainen T, Jula A, Harkanen T, Vartiainen E, Koponen P. Contribution of sociodemographic and lifestyle-related factors to the differences in metabolic syndrome among Russian, Somali and Kurdish migrants compared with Finns. *Int J Cardiol* 2017 Apr 1;232:63-69.
- (11) Rask S, Sainio P, Castaneda AE, Harkanen T, Stenholm S, Koponen P, et al. The ethnic gap in mobility: a comparison of Russian, Somali and Kurdish origin migrants and the general Finnish population. *BMC Public Health* 2016 Apr 18;16:340-016-2993-1.
- (12) Rask S, Suvisaari J, Koskinen S, Koponen P, Molsa M, Lehtisalo R, et al. The ethnic gap in mental health: A population-based study of Russian, Somali and Kurdish origin migrants in Finland. *Scand J Public Health* 2016 May;44(3):281-290.
- (13) National Institute for Health and Welfare. Developing the health examination protocol for asylum seekers in Finland: A national development project (TERTTU). 2018. Accessed November 1, from:

1  
2  
3 <https://thl.fi/en/web/thlfi-en/research-and-expertwork/projects-and-programmes/developing-the-health-examination-protocol-for-asylum-seekers-in-finland-a-national-development-project-terttu->

4  
5  
6 (14) Lwanga SK, Lemeshow S. Sample size determination in health studies : a practical manual. Geneva:  
7 World Health Organization. 1991. Accessed November 1, 2018  
8 from: <http://www.who.int/iris/handle/10665/40062>.

9  
10  
11 (15) Tolonen H. Part B, Fieldwork Procedures. Directions 2016\_14. 2016. Accessed July 1, 2018 from:  
12 <http://urn.fi/URN:ISBN:978-952-302-701-5>.

13  
14 (16) Mipatrini D, Stefanelli P, Severoni S, Rezza G. Vaccinations in migrants and refugees: a challenge for  
15 European health systems. A systematic review of current scientific evidence. Pathog Glob Health  
16 2017;111(2):59-68.

17  
18  
19 (17) UNESCO Institute of Statistics. International Standard Classification of Education ISCED 2011. 2012.  
20 Accessed November 1, 2018 from: [http://uis.unesco.org/sites/default/files/documents/international-](http://uis.unesco.org/sites/default/files/documents/international-standard-classification-of-education-isced-2011-en.pdf)  
21 [standard-classification-of-education-isced-2011-en.pdf](http://uis.unesco.org/sites/default/files/documents/international-standard-classification-of-education-isced-2011-en.pdf).

22  
23 (18) Eurostat. European Health Interview Survey (EHIS Wave 3). Methodological manual. Luxembourg,  
24 Publications office of the European Union. 2018. Accessed November 1, 2018 from:  
25 [https://ec.europa.eu/eurostat/documents/3859598/8762193/KS-02-18-240-EN-N.pdf/5fa53ed4-4367-](https://ec.europa.eu/eurostat/documents/3859598/8762193/KS-02-18-240-EN-N.pdf/5fa53ed4-4367-41c4-b3f5-260ced9ff2f6)  
26 [41c4-b3f5-260ced9ff2f6](https://ec.europa.eu/eurostat/documents/3859598/8762193/KS-02-18-240-EN-N.pdf/5fa53ed4-4367-41c4-b3f5-260ced9ff2f6).

27  
28  
29 (19) Pynoos R, Rodriguez N, Steinberg A, Stuber M, & Frederick C. UCLA PTSD Index for DSM-IV. 1998.  
30 Accessed September 15, 2018 from:  
31 <https://www.mc.vanderbilt.edu/coe/tfcbt/workbook/Assessment/UCLA%20PTSD%20Index-%20Parent.pdf>

32  
33  
34 (20) Loeb M, Cappa C, Cialesi R, de Palma E. Measuring child functioning: the Unicef/ Washington Group  
35 Module. Salud Publica Mex 2017 Jul-Aug;59(4):485-487.

36  
37  
38 (21) Mollica RF, Caspi-Yavin Y, Bollini P, Truong T, Tor S, Lavelle J. The Harvard Trauma Questionnaire.  
39 Validating a cross-cultural instrument for measuring torture, trauma, and posttraumatic stress disorder in  
40 Indochinese refugees. J Nerv Ment Dis 1992 Feb;180(2):111-116.

41  
42  
43 (22) Derogatis LR, Lipman RS, Rickels K, Uhlenhuth EH, Covi L. The Hopkins Symptom Checklist (HSCL): a  
44 self-report symptom inventory. Behav Sci 1974 Jan;19(1):1-15.

45  
46 (23) Dimitrova M, Gologanova K, Friele B, Rueffer J., Kroo A, Szilvia K, et al. PROTECT - Process of  
47 recognition and Orientation of Torture Victims in European Countries to Facilitate Care and Treatment.  
48 2013. Accessed November 1, 2018 from [http://protect-able.eu/wp-content/uploads/2013/01/protect-](http://protect-able.eu/wp-content/uploads/2013/01/protect-global-eng.pdf)  
49 [global-eng.pdf](http://protect-able.eu/wp-content/uploads/2013/01/protect-global-eng.pdf).

50  
51 (24) Bush K, Kivlahan DR, McDonnell MB, Fihn SD, Bradley KA. The AUDIT alcohol consumption questions  
52 (AUDIT-C): an effective brief screening test for problem drinking. Ambulatory Care Quality Improvement  
53 Project (ACQUIP). Alcohol Use Disorders Identification Test. Arch Intern Med 1998 Sep 14;158(16):1789-  
54 1795.

55  
56  
57 (25) ESPAD. Questionnaire of Substance Use. The European School Survey Project on Alcohol and Other  
58 Drugs. 2011. Accessed November 1, 2018 from:  
59 [http://www.espad.org/sites/espad.org/files/ESPAD\\_Questionnaire\\_2011.pdf](http://www.espad.org/sites/espad.org/files/ESPAD_Questionnaire_2011.pdf).

**Table 1 Stages of the TERTTU Survey**

| <b>Baseline data collection</b>                            |                                                                                                                                                                                       |
|------------------------------------------------------------|---------------------------------------------------------------------------------------------------------------------------------------------------------------------------------------|
| 3-10/2017                                                  | Planning the data collection of the baseline TERTTU Survey.                                                                                                                           |
| 9/2017-1/2018                                              | Receiving Coordinating Ethics Committee of the Helsinki and Uusimaa Hospital District permission for implementing baseline and follow-up studies.                                     |
| 11/2017                                                    | Piloting the TERTTU Survey among volunteers with asylum seeker background.                                                                                                            |
| 12/2017-1/2018                                             | Recruitment of the research nurses.                                                                                                                                                   |
| 2/2018                                                     | Training of the research nurses.                                                                                                                                                      |
| 3/2018-12/2018                                             | Baseline data collection.                                                                                                                                                             |
| 2/2019-4/2019                                              | Data management, data quality assessment and analysis.                                                                                                                                |
| 5-6/2019                                                   | Reporting basic findings.                                                                                                                                                             |
| 7/2019 -                                                   | Data available for research purposes to other researchers upon an accepted study proposal by the National Institute for Health and Welfare.                                           |
| 7-12/2019                                                  | Dissemination of the main findings of the baseline TERTTU Survey and use for evidence-based development of the national health examination protocol for newly arrived asylum seekers. |
| <b>1. Follow-up of TERTTU Survey participants</b>          |                                                                                                                                                                                       |
| 2020 onwards                                               | Linkage of reception centre electronic health records to baseline TERTTU Survey data based on unique asylum process identification number.                                            |
| <b>2. Follow-up of baseline TERTTU Survey participants</b> |                                                                                                                                                                                       |
| 2020 onwards                                               | Feasibility of linking national register data to baseline TERTTU Survey data among persons granted asylum will be evaluated.                                                          |

**Table 2 Content of the interview of the Asylum Seekers Health and Wellbeing Survey (TERTTU)**

| Themes                          | Variable/measure                                                             | Questionnaire instrument/measures                                                                                                                                                                    | Age group                 |
|---------------------------------|------------------------------------------------------------------------------|------------------------------------------------------------------------------------------------------------------------------------------------------------------------------------------------------|---------------------------|
| Sociodemographics               | Age, sex, year of birth, mother tongue, prior country of permanent residence | -                                                                                                                                                                                                    | Adults<br>0-17 year-olds  |
| Asylum seeking journey          | Year when left permanent residence, route to Finland                         | Countries, types of housing and duration of stay in these locations during the asylum journey                                                                                                        | Adults<br>0-17 year-olds  |
| Literacy                        | Language skills, reading and writing skills                                  | Mastery of languages other than mother tongue, ability to read and write (7+ year-olds)                                                                                                              | Adults<br>0-17 year-olds  |
| Previous socioeconomic status   | Education, occupation                                                        | International Standard Classification of Education (ISCED-2011) (17), prior occupation                                                                                                               | Adults                    |
| Health status                   | Self-rated health, presence of long-term conditions                          | Minimum European Health Module (MEHM) (18)                                                                                                                                                           | Adults<br>0-17 year-olds  |
|                                 | Chronic and infectious diseases, medications, current physical symptoms      | Various health conditions diagnosed by a physician, need for regular medication, current medication, various somatic symptoms, tuberculosis symptoms, prior infectious diseases, vaccination history | Adults<br>0-17 year-olds  |
|                                 | Functional capacity                                                          | adapted from Washington Group Module (19)<br>adapted from Unicef/ Washington Group Module (20)                                                                                                       | Adults<br>0-17 year-olds  |
| Early childhood and development | Gestation, early life development                                            | Gestation week at birth, complications during birth, birth weight, height, early life development milestones                                                                                         | 0-12 year-olds            |
|                                 | Growth and development                                                       | Previously identified problems in growth and development                                                                                                                                             | 0-17 year-olds            |
| Sexual and reproductive health  | Sexual behaviour                                                             | Questions related to risk behavior predisposing to sexually transmitted diseases                                                                                                                     | Adults<br>13-17 year-olds |
|                                 | Male circumcision/female genital mutilation                                  | Age of circumcision (if circumcised), problems associated with female genital mutilation                                                                                                             | Adults<br>0-17 year-olds  |
|                                 | Pregnancies and births                                                       | Number of pregnancies, miscarriages, abortions, parity                                                                                                                                               | Adults<br>13-17 year-olds |
| Traumatic events                | Physical trauma due to accident/violence                                     | Types of injuries before/during asylum journey                                                                                                                                                       | Adults                    |
|                                 | Potentially traumatic life events                                            | Various traumatic life events, adapted from Harvard Trauma Questionnaire (21)<br>Potentially traumatic events, adapted from UCLA PTSD INDEX FOR DSM-IV (19)                                          | Adults<br>0-17 year-olds  |

|                 |                                         |                                                                                 |                           |
|-----------------|-----------------------------------------|---------------------------------------------------------------------------------|---------------------------|
| Mental health   | Mental health symptoms                  | HSCL-25 (22,23), PROTECT-able SDQ                                               | Adults<br>2-17 year-olds  |
| Health behavior | Smoking                                 | Frequency of smoking, use of different types of tobacco products                | Adults<br>13-17 year-olds |
|                 | Alcohol use                             | Alcohol use, AUDIT-C (24)<br>Alcohol use, adapted from ESPAD questionnaire (25) | Adults<br>13-17 year-olds |
|                 | Drugs                                   | Use of intravenous and other drugs                                              | Adults<br>13-17 year-olds |
|                 | Diet                                    | Intake of selected food items                                                   | Adults<br>0-17 year-olds  |
|                 | Dental health                           | Frequency of brushing teeth, latest visit to a dentist                          | Adults<br>0-17 year-olds  |
| Social networks | Family members, contact with close ones | Whereabouts of close family members, being able to be in touch with close ones  | Adults<br>0-17 year-olds  |

PROTECT, Process of recognition and Orientation of Torture Victims in European Countries to Facilitate Care and Treatment; AUDIT-C, AUDIT Alcohol Consumption Questionnaire; ESPAD, The European School Survey Project on Alcohol and Other Drugs.



**Table 3 Content of the health examination of the Asylum Seekers Health and Wellbeing Survey (TERTTU)**

| Variable                | Measurement tool                           | Measurement method                                                                                                                                                               | Age group                 |
|-------------------------|--------------------------------------------|----------------------------------------------------------------------------------------------------------------------------------------------------------------------------------|---------------------------|
| Weight                  | Seca 877                                   | Measured wearing no shoes and only light clothing, with no heavy objects in the pockets. If the participant is pregnant, self-reported weight before pregnancy is recorded. (15) | Adults<br>7-17 year-olds  |
| Height                  | Stand-alone stadiometer, Seca 217          | Measured wearing no shoes and standing upright, looking straight ahead. (15)                                                                                                     | Adults<br>7-17 year-olds  |
| Waist circumference     | Soft measuring tape, Hoehstmast            | Measurement taken on bare skin on top of light clothing, half-way between the lowest rib and the top of iliac crest. (15)                                                        | Adults<br>13-17 year-olds |
| Upper arm circumference | Soft measuring tape, Hoehstmast            | Measurement taken on bare skin, with the elbow resting comfortably on the surface of the table at a 90 degree angle.                                                             | Adults<br>13-17 year-olds |
| Blood pressure          | Omron i-C10 digital blood pressure monitor | Measurement taken three times with a one minute interval on bare skin. (15)                                                                                                      | Adults<br>13-17 year-olds |
| Pulse                   | Manually, with a stopwatch                 | Each pulse beat is counted for 60 seconds. (15)                                                                                                                                  | Adults<br>13-17 year-olds |
| Dental examination      | -                                          | Existence of removable teeth prosthesis, number of teeth (without removable teeth prosthesis), standardised evaluation of dental health                                          | Adults<br>7-17 year-olds  |
| Skin condition          | -                                          | Standardised evaluation of skin condition (identification of bruises and rash)                                                                                                   | 0-12 year-olds            |
| BCG scar                | -                                          | Standardised evaluation of the presence of Bacillus Calmette-Guérin (BCG) scar                                                                                                   | 0-6 year-olds             |

**Table 4 Potential register linkages in the TERTTU Survey**

| <b>National register</b>                  | <b>Type of information</b>                                                            |
|-------------------------------------------|---------------------------------------------------------------------------------------|
| Population Register Centre                | Place of residence, marital status, nationality                                       |
| Ministry of Employment and the Economy    | Use of employment services, participation in activities for promoting employment      |
| Social Insurance Institution of Finland   | Social benefits and reimbursements for medical costs                                  |
| National Institute for Health and Welfare | Number and reasons for healthcare visits and hospital care, procedures and treatments |
| Statistics Finland                        | Socio-economic position, education and causes of death                                |

1  
2 **Figure legends**  
3  
4  
5

6 **Figure 1 Conceptual framework of the TERTTU Survey** (Figure 1 preferably reproduced in colour)  
7

8 **Figure 2 Permanent study locations in transit reception centres**  
9

10 **Figure 3 Flow chart of the baseline TERTTU Survey**  
11

12  
13  
14  
15 **Supplement Figure 1 Brief information pamphlet given in connection with booking a time for a reach-out appointment**  
16

17 (Supplement Figure 1 preferably reproduced in colour)  
18  
19  
20  
21  
22  
23  
24  
25  
26  
27  
28  
29  
30  
31  
32  
33  
34  
35  
36  
37  
38  
39  
40  
41  
42  
43  
44  
45  
46

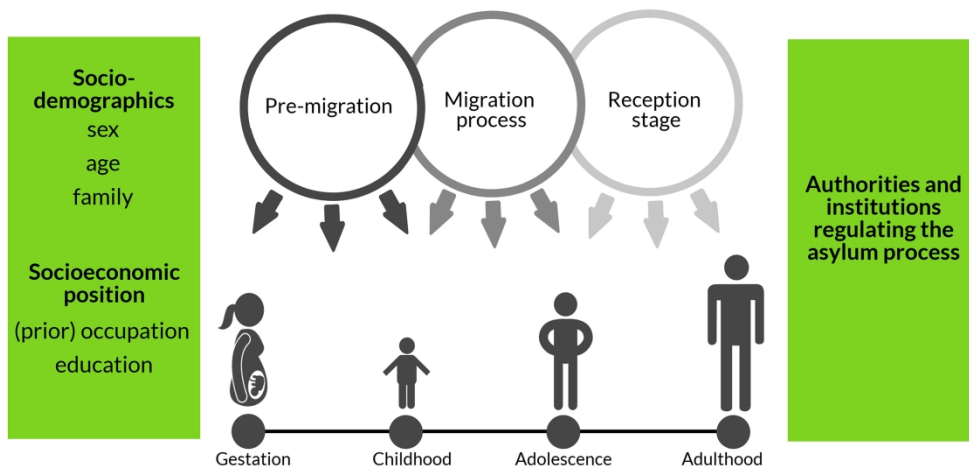

Figure 1 Conceptual framework of the TERTTU Survey

297x145mm (300 x 300 DPI)

1  
2  
3  
4  
5  
6  
7  
8  
9  
10  
11  
12  
13  
14  
15  
16  
17  
18  
19  
20  
21  
22  
23  
24  
25  
26  
27  
28  
29  
30  
31  
32  
33  
34  
35  
36  
37  
38  
39  
40  
41  
42  
43  
44  
45  
46  
47  
48  
49  
50  
51  
52  
53  
54  
55  
56  
57  
58  
59  
60

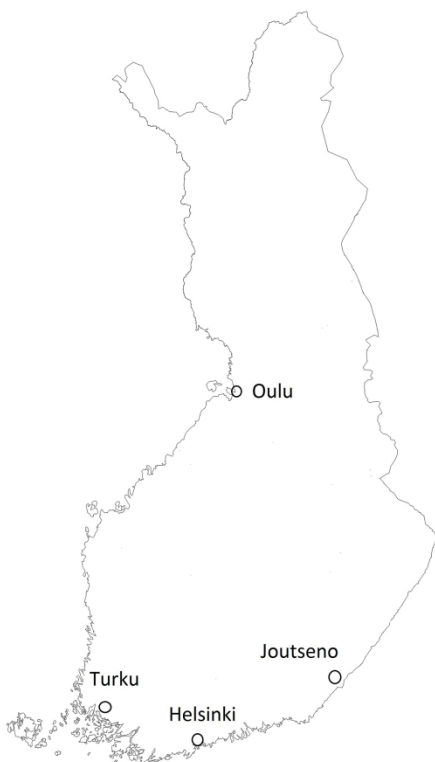

Figure 2 Permanent study locations in transit reception centres  
212x299mm (300 x 300 DPI)

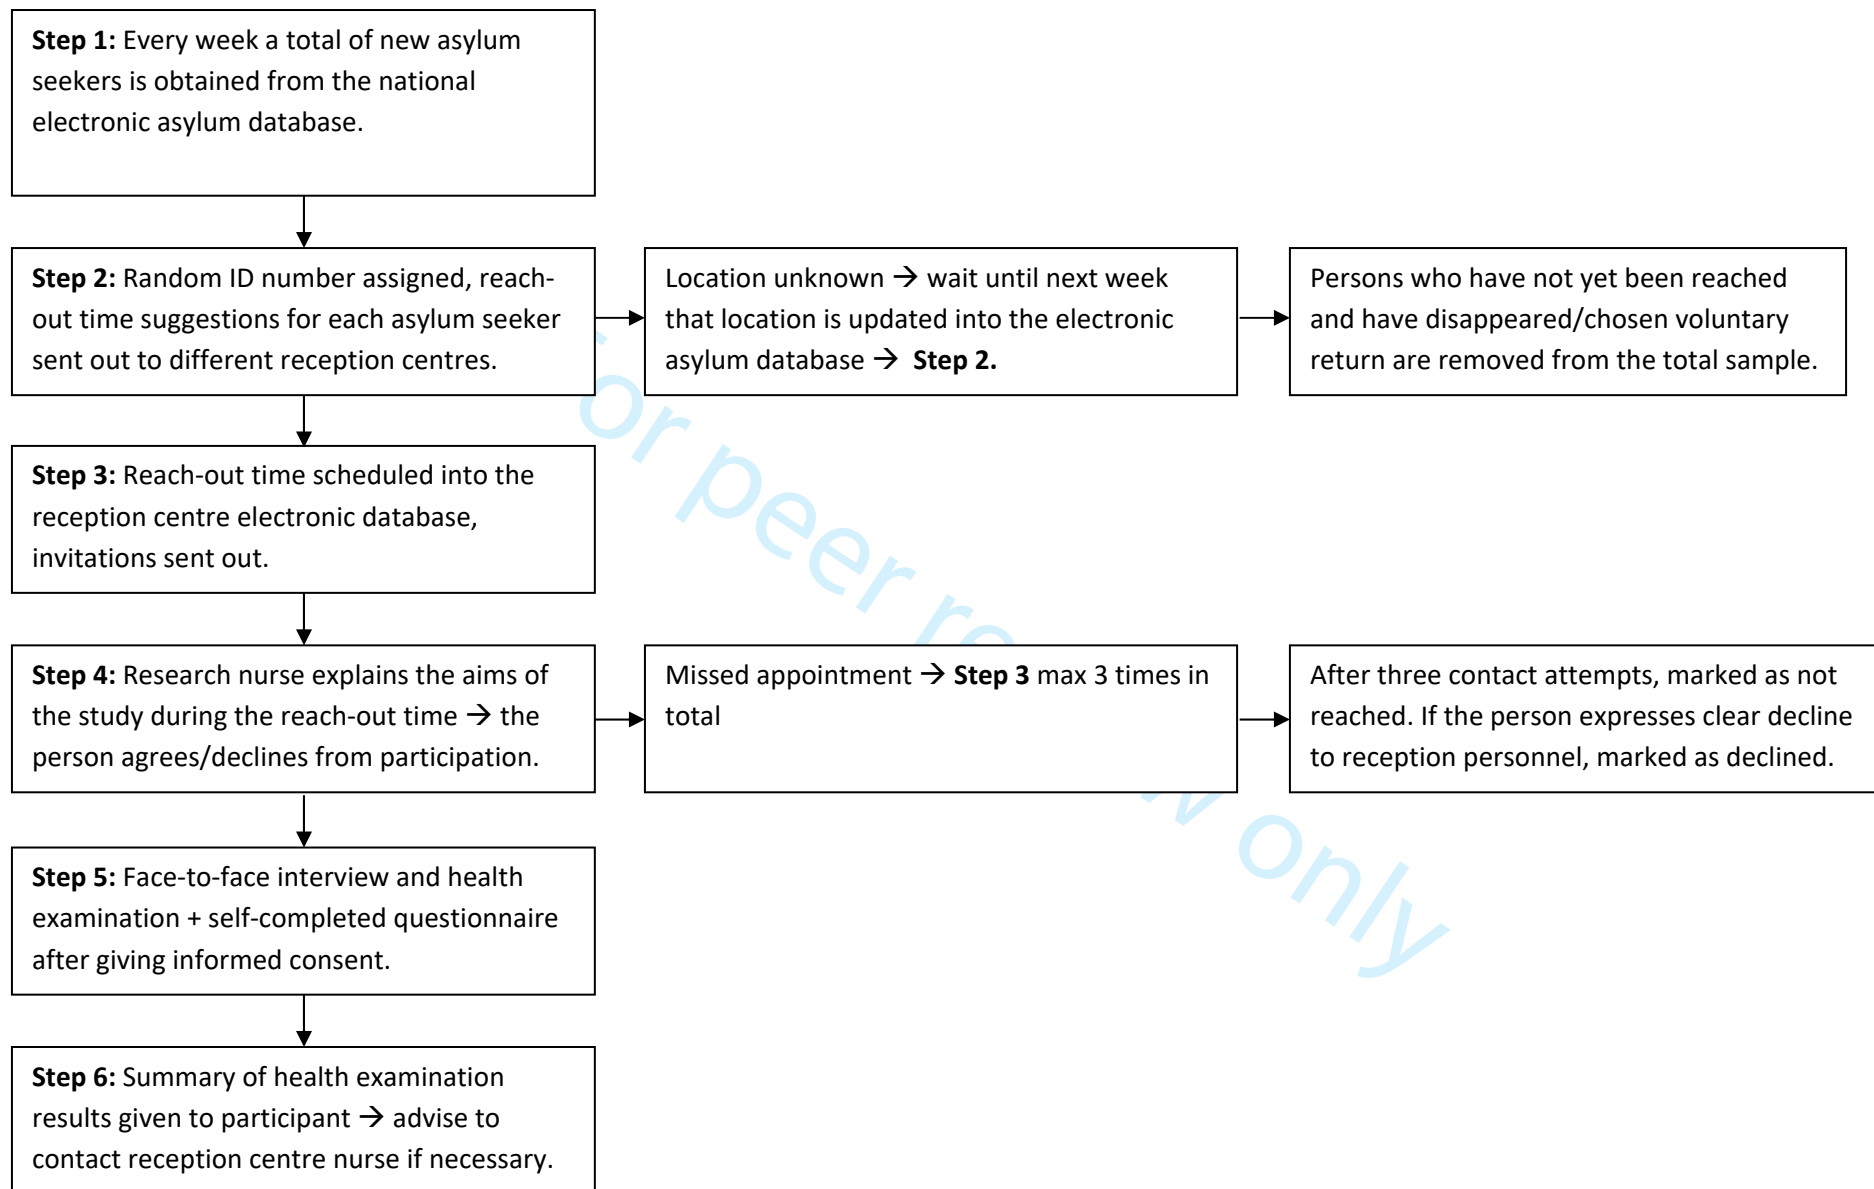

1  
2  
3  
4  
5  
6  
7  
8  
9  
10  
11  
12  
13  
14  
15  
16  
17  
18  
19  
20  
21  
22  
23  
24  
25  
26  
27  
28  
29  
30  
31  
32  
33  
34  
35  
36  
37  
38  
39  
40  
41  
42  
43  
44  
45  
46  
47  
48  
49  
50  
51

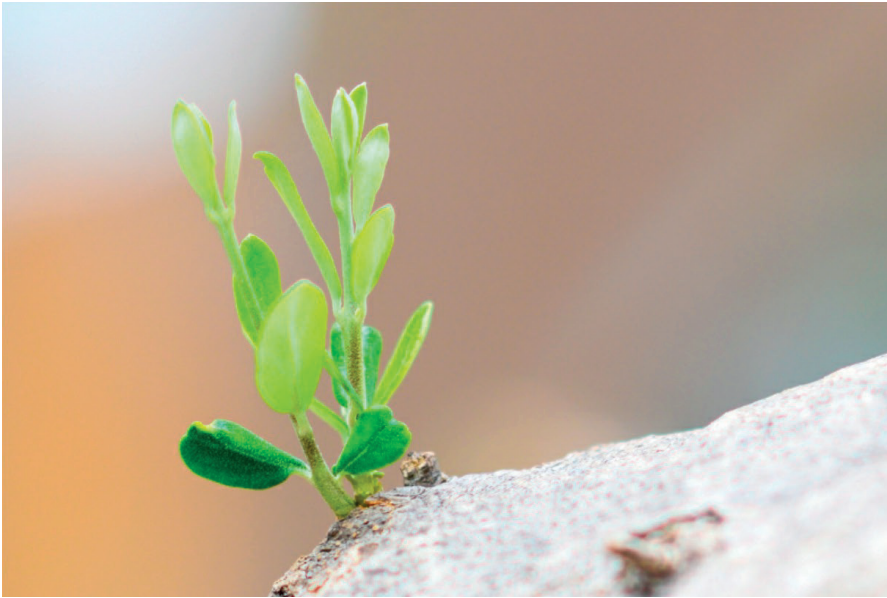

TERTTU promotes the health and wellbeing of asylum seekers through:

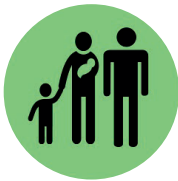

Gathering representative information on the health of newly arrived asylum seekers

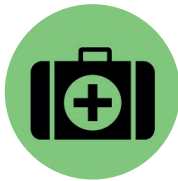

Developing the current health examination protocol

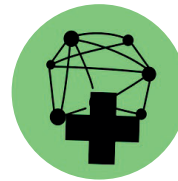

Developing unified practices across reception centers

*Unified practices and evaluation tools.  
Right kind of help at the right time.*

1  
2  
3  
4  
5  
6  
7  
8  
9  
10  
11  
12  
13  
14  
15  
16  
17  
18  
19  
20  
21  
22  
23  
24  
25  
26  
27  
28  
29  
30  
31  
32  
33  
34  
35  
36  
37  
38  
39  
40  
41  
42  
43  
44  
45  
46  
47  
48  
49  
50  
51

# TERTTU

Developing the health examination protocol for newly arrived asylum seekers

## Stages of the project

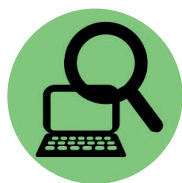

2017  
Overview of current practices, electronic health record analysis

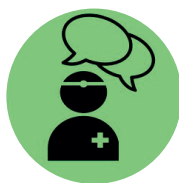

2018  
Conducting a Health and Wellbeing Survey in reception centres

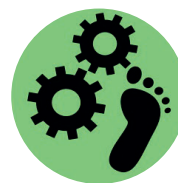

2019  
Developing the health examination protocol

For more information: [www.thl.fi/terttu-project](http://www.thl.fi/terttu-project)

## In co-operation

National Institute for Health and Welfare (THL) • Finnish Immigration Service

Supported by The European Union, the Asylum, Migration and Integration Fund (Amif)

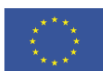

### CONTACT US

**Natalia Skogberg**  
Project Manager, THL  
[natalia.skogberg@thl.fi](mailto:natalia.skogberg@thl.fi)

**Katri-Leena Mustonen**  
Project Coordinator, THL  
[katri-leena.mustonen@thl.fi](mailto:katri-leena.mustonen@thl.fi)



# BMJ Open

**The Asylum Seekers Health and Wellbeing (TERTTU) Survey: study protocol for a prospective total population health examination survey on the health and service needs of newly arrived asylum seekers in Finland**

|                                 |                                                                                                                                                                                                                                                                                                                                                                                                                                                                                                                  |
|---------------------------------|------------------------------------------------------------------------------------------------------------------------------------------------------------------------------------------------------------------------------------------------------------------------------------------------------------------------------------------------------------------------------------------------------------------------------------------------------------------------------------------------------------------|
| Journal:                        | <i>BMJ Open</i>                                                                                                                                                                                                                                                                                                                                                                                                                                                                                                  |
| Manuscript ID                   | bmjopen-2018-027917.R1                                                                                                                                                                                                                                                                                                                                                                                                                                                                                           |
| Article Type:                   | Protocol                                                                                                                                                                                                                                                                                                                                                                                                                                                                                                         |
| Date Submitted by the Author:   | 24-Jan-2019                                                                                                                                                                                                                                                                                                                                                                                                                                                                                                      |
| Complete List of Authors:       | Skogberg, N. ; National Institute for Health and Welfare, Helsinki, Finland, Welfare<br>Koponen, Päivikki; National Institute for Health and Welfare, Public Health Solutions<br>Tiittala, Paula; National Institute for Health and Welfare<br>Mustonen, Katri-Leena; National Institute for Health and Welfare, Welfare<br>Lilja, Eero; National Institute for Health and Welfare, Welfare<br>Snellman, Olli; Finnish Immigration Service<br>Castaneda, Anu; National Institute for Health and Welfare, Welfare |
| <b>Primary Subject Heading</b>: | Epidemiology                                                                                                                                                                                                                                                                                                                                                                                                                                                                                                     |
| Secondary Subject Heading:      | Global health, Health services research, Health policy                                                                                                                                                                                                                                                                                                                                                                                                                                                           |
| Keywords:                       | Organisation of health services < HEALTH SERVICES ADMINISTRATION & MANAGEMENT, EPIDEMIOLOGY, Protocols & guidelines < HEALTH SERVICES ADMINISTRATION & MANAGEMENT, asylum seeker and refugee health, Health policy < HEALTH SERVICES ADMINISTRATION & MANAGEMENT                                                                                                                                                                                                                                                 |
|                                 |                                                                                                                                                                                                                                                                                                                                                                                                                                                                                                                  |

SCHOLARONE™  
Manuscripts

1  
2  
3 The Asylum Seekers Health and Wellbeing (TERTTU) Survey: study protocol for a prospective total  
4 population health examination survey on the health and service needs of newly arrived asylum seekers in  
5  
6  
7 Finland  
8  
9

10 Natalia Skogberg<sup>a\*</sup>, Päivikki Koponen<sup>b</sup>, Paula Tiittala<sup>c</sup>, Katri-Leena Mustonen<sup>a</sup>, Eero Lilja<sup>a</sup>, Olli Snellman<sup>d</sup>, Anu  
11  
12 Castaneda<sup>a</sup>.

13  
14  
15  
16 [the surname of each author is underlined]  
17  
18  
19  
20

21 <sup>a</sup>Department of Welfare, National Institute for Health and Welfare, Helsinki, Finland.  
22

23 <sup>b</sup>Department of Public Health Solutions, National Institute for Health and Welfare, Helsinki, Finland;  
24

25 <sup>c</sup>Department of Health Security, National Institute for Health and Welfare, Helsinki, Finland;  
26  
27

28 <sup>d</sup>Finnish Immigration Service, Helsinki, Finland.  
29  
30  
31

32 \*Corresponding author: Natalia Skogberg, Department of Welfare, National Institute for Health and  
33  
34 Welfare; Mannerheimintie 166, PL 30, 00271 Helsinki, Finland; e-mail: natalia.skogberg@thl.fi; telephone:  
35  
36 +358295247916; fax: +358295246111.  
37  
38  
39

40 Keywords: organization of health services, health policy, protocols and guidelines, epidemiology, asylum  
41  
42 seeker and refugee health  
43  
44  
45  
46  
47

48 Word count abstract: 255 words  
49

50  
51 Word count main text: 3874 words  
52  
53  
54  
55  
56  
57  
58  
59  
60

## Abstract

### Introduction

Health, wellbeing and health service needs of asylum seekers have emerged as urgent topics following the arrival of 2.5 million asylum seekers to EU between 2015 and 2016. However, representative information on the health, wellbeing and service needs of asylum seekers is scarce. The aim of the Asylum Seekers Health and Wellbeing (TERTTU) Survey is to 1) gather population-based representative information; 2) identify key indicators for systematic monitoring; 3) produce the evidence-base for development of systematic screening of asylum seekers' health, wellbeing and health service needs.

### Methods and analysis

TERTTU Survey is a population-based prospective study with a total population sample of newly arrived asylum seekers to Finland, including adults and children. Baseline data collection is carried out in reception centres in 2018 and consists of a face-to-face interview, self-administered questionnaire and a health examination following a standardised protocol. Altogether 1000 asylum seekers will be included into the study. Baseline data will be followed up with national electronic health record data encompassing the entire asylum process and later with national register data among persons who are receive residency permits.

### Ethics and dissemination

Ethical approval has been granted by the Coordinating Ethics Committee of the Helsinki and Uusimaa Hospital District. Participation is voluntary and based on written informed consent. Results will be widely disseminated on a national and international level to inform health and welfare policy as well as development of services for asylum seekers. Results of the study will constitute the evidence base for development and implementation of the initial health assessment for asylum seekers on a national level.

1  
2  
3  
4  
5  
6  
7  
8  
9  
10  
11  
12  
13  
14  
15  
16  
17  
18  
19  
20  
21  
22  
23  
24  
25  
26  
27  
28  
29  
30  
31  
32  
33  
34  
35  
36  
37  
38  
39  
40  
41  
42  
43  
44  
45  
46  
47  
48  
49  
50  
51  
52  
53  
54  
55  
56  
57  
58  
59  
60

## Strengths and limitations

- This is the first population-based face-to-face interview and health examination survey among newly arrived asylum seekers in Finland.
- The findings of the study will be used for producing unique information on the health status and health service needs of asylum seekers from the very early point of arrival to Finland and for identification of key indicators for health monitoring.
- With participants' informed consent their baseline survey data will be supplemented with register-based follow-up data on the health and later service use of asylum seekers over the course of the asylum process.
- If feasible, those who have been granted a residency permit will be followed-up using national registers to examine the influence of migration-related factors on long-term trajectories of health and integration.
- Studying newly arrived asylum seekers poses methodological and logistical challenges as well as requires ability for quick responses in a rapidly changing setting.

## 1 Introduction

The peak in asylum applications to Europe between 2015 to 2016 highlighted the need for developing more effective policies for meeting both urgent and long-term healthcare needs of asylum seekers (1,2). An asylum seeker is defined based on their legal status as a person who has applied for international protection and is waiting for a decision on legal asylum, as opposed to a refugee who has already been granted legal asylum (3). Representative population-based information on the health and wellbeing of asylum seekers is needed to guide decision-making and planning of healthcare services for asylum seekers (1). Such information is, however, limited in Europe.

Previous studies have focused mainly on one area of health or wellbeing among asylum seekers, for example on infectious diseases (4-6), mental health (7,8), access to healthcare services (9,10) and human capital (11). Asylum seekers have been reported to be disproportionately burdened by communicable and non-communicable diseases, including a high prevalence of respiratory, gastrointestinal, dermatological and sexually transmitted diseases (5,6,12), poor dental health (5) and physical limitations (10). Prevalence of clinically significant symptoms of depression, anxiety and risk for post-traumatic stress disorder have also been reported to be significantly higher among asylum seekers compared with the general population in receiving countries (7,8). Asylum seekers have also been reported to have a higher prevalence of unmet needs for care, hospital admissions and visits to a psychotherapist but less visits to a general physician compared with the general German population (10).

Previous studies on the health and wellbeing of asylum seekers are generally limited in generalizability to the entire asylum seeker population in the given country due to sample size restrictions and sampling methodology. A further common limitation in previous studies is that asylum seekers and refugees are examined as one group. No previous studies among newly arrived asylum seekers including a nationally representative population-based sample and with standardised objective health examination measures have been identified. In Finland, current information on the health and wellbeing of asylum seekers is limited mainly to infectious disease screening (13) and access to healthcare and social services (14).

1  
2  
3  
4  
5  
6  
7  
8  
9  
10  
11  
12  
13  
14  
15  
16  
17  
18  
19  
20  
21  
22  
23  
24  
25  
26  
27  
28  
29  
30  
31  
32  
33  
34  
35  
36  
37  
38  
39  
40  
41  
42  
43  
44  
45  
46  
47  
48  
49  
50  
51  
52  
53  
54  
55  
56  
57  
58  
59  
60

According to a recent healthcare register-based study, the most common reasons for healthcare visits among asylum seekers in Finland are dental and musculoskeletal problems and mental health symptoms (15). More information is available on the health and wellbeing of persons of refugee origin that have a permanent residence status in Finland. Based on these studies, persons of refugee background have been found to be at a particular disadvantage with respect to a number of health outcomes, including a high incidence of chronic disease risk factors (16), mobility limitations (17) and poor mental health (18).

The main objective of The Asylum Seekers Health and Wellbeing (TERTTU) Survey is to gather systematic and representative interview and health examination data on the health, wellbeing and health service needs of newly arrived asylum seekers in Finland. Participants in the baseline TERTTU Survey will be followed up using register-based data, providing a unique opportunity to examine trajectories of health of asylum seekers from the very early stages of arrival to Finland. The TERTTU Survey data will be used for identification of key indicators for systematic monitoring of asylum seekers health at a national level. The study will also generate data that can be used for designing health promotion measures in reception centres. Correct and timely identification of vulnerable populations and persons in need of services is likely to have significant impact on the immediate and long-term health of asylum seekers (19). Furthermore, it facilitates optimising of existing resources in healthcare provision (20).

## 2 Methods and analysis

The TERTTU Survey is coordinated by the Equality and Inclusion Unit of the National Institute for Health and Welfare, Finland. The study is conducted in collaboration with the Finnish Immigration Service and the reception centres as a part of an EU Asylum, Migration and Integration Fund project aiming at developing evidence-based health examination protocol for newly arrived asylum seekers (21). The Finnish Immigration Service under the Ministry of Interior is responsible for regulation, organisation, steering, supervision and funding of sheltering and health services for asylum seekers, whereas the reception centres are the main providers of health care services (22). Close collaboration with stakeholders provides with a unique opportunity for direct implementation of research findings into practice. Evidence-based development of the health examination protocol will promote equality in the access and quality of services provided for asylum seekers. Stages of the TERTTU Survey are outlined in Table 1.

[Table 1 about here]

A multidisciplinary consortium was formed at the planning stage of the survey consisting of experts from different departments and units of the National Institute for Health and Welfare as well as from other collaborating bodies such as regional authorities, universities, non-governmental organisations and experts working in clinical practice. Conceptual framework of the TERTTU Survey is presented in Figure 1. Asylum seekers may arrive at any life stage and their health and wellbeing are influenced by pre-migration, migration process-related and post migration experiences. Sociodemographic and socioeconomic factors mediate the influence of migration-related factors and other exposures throughout the life course (23). Authorities and institutions regulating the asylum process have a central impact on health outcomes of asylum seekers through defining the rights for services and quality criteria for the services provided to asylum seekers.

[Figure 1 about here]

1  
2  
3 Data collection of the TERTTU Survey is implemented by eight trained multilingual research nurses. In  
4 addition to having a good command of Finnish, languages spoken by research nurses include English,  
5 Arabic, Somali, Persian, Dari, Sorani dialect of Kurdish, Urdu, Russian, Portuguese and French. All of the  
6 study material given to the participants (including information leaflets and consent forms), have been  
7 translated into the most common languages spoken by asylum seekers, which are English, Arabic, Somali,  
8 Persian, Sorani dialect of Kurdish and Russian. Material is translated into additional languages over the  
9 course of the survey if needed. If the study participant speaks another language than the ones spoken by  
10 research nurses, a professional interpreter is used. Professional interpreters are used from accredited  
11 companies and are briefed concerning the importance of standardised protocol.  
12  
13  
14  
15  
16  
17  
18  
19  
20  
21  
22  
23  
24  
25  
26

## 27 **2.1 Study population**

28  
29  
30 The study population includes all newly arrived asylum seekers, who have applied for asylum for the first  
31 time in Finland. Exclusion criteria are persons who: 1) reside in a detention centre; 2) have applied for  
32 asylum in another country and are transferred to Finland based on international agreements (internal  
33 transfer); 3) have been returned to Finland according to the Dublin regulation; 4) have previously had a  
34 residence permit in Finland; 5) children born in Finland. The number of asylum applications varies on a  
35 weekly basis. Participants are recruited into the study approximately two weeks following registration of  
36 their asylum application in Finland. Such sampling frame requires continuous sampling of study participants  
37 compared with retrospective sampling that is generally used in health interview and health examination  
38 surveys. There are approximately 40-60 new asylum applications a week fitting the selection criteria of the  
39 study, which enables inclusion of the total population sample into the study.  
40  
41  
42  
43  
44  
45  
46  
47  
48  
49  
50  
51  
52

53 Both adults and children are invited to participate in the study. This enables to link family members. The  
54 population-based sample is drawn on a weekly basis from an electronic database containing data on all  
55 asylum seekers in Finland and maintained by the Finnish Immigration Services. Each asylum seeker receives  
56 a unique identity number that is used throughout the asylum seeking process. Additional registered  
57  
58  
59  
60



1  
2  
3 information includes date of the asylum application, name, sex, date and country of birth, nationality,  
4  
5 mother tongue and desired language of the interpreter services.  
6  
7  
8  
9

## 10 11 **2.2 Recruitment of study participants** 12

13  
14 Currently (2018), there are altogether 49 reception centres in Finland, out of which 43 are for adults and  
15  
16 families and 6 for unaccompanied minors. The number of reception centres varies depending on the  
17  
18 number of asylum applications and the speed of the decision processes. A substantial majority of adults  
19  
20 and families are initially directed to transit reception centres, where they wait for the asylum interview.  
21  
22 Transit reception centres are located in Helsinki (capital of Finland), Turku, Joutseno and Oulu (Figure 2).  
23  
24 Some newly arrived asylum seekers arrange private housing for themselves. In such case, they are allocated  
25  
26 to the geographically closest reception centre for provision of health and social services throughout the  
27  
28 asylum process. Unaccompanied minors are usually directed to units for minors, where they remain  
29  
30 throughout the entire asylum process. Since participants of the TERTTU Survey are recruited at an early  
31  
32 stage of the asylum process, transit reception centres are the permanent study sites. However since the  
33  
34 TERTTU Survey is based on a total population sample, the survey is conducted in any other national  
35  
36 reception centres depending on where the persons included into the study sample are situated.  
37  
38  
39  
40

41  
42 [Figure 2 about here]  
43  
44

45  
46 Recruitment of study participants in transit reception centres is outlined in Figure 3. Recruitment is the  
47  
48 responsibility of the research nurse. However, reception centre personnel have a central role in facilitating  
49  
50 the initial contact between the research nurse and persons belonging to the study sample. An invitation  
51  
52 with a set time for a reach-out appointment with the research nurse and a brief information leaflet are  
53  
54 delivered to asylum seekers by reception centre personnel. The information leaflet is available in the study  
55  
56 languages and is designed to be understandable even with limited language or literacy skills. [Link to  
57  
58 Supplement Figure 1]  
59  
60

1  
2  
3 [Figure 3 about here]  
4  
5

6 The purpose of the reach-out appointment is that the research nurse makes personal contact with the  
7  
8 persons invited to participate in the study. By providing information on the aims and content of the study,  
9  
10 the research nurse ensures that the person invited to participate has sufficient information to give  
11  
12 informed consent for participation. Booking a reach-out time is the only possibility for personal contact as  
13  
14 no telephone numbers are available for newly-arrived asylum seekers and research nurses do not have  
15  
16 access to the living areas of the reception centres due to security regulations. If the asylum seeker does not  
17  
18 arrive to their reach-out appointment, the research nurse requests the reception centre's social counselors  
19  
20 to see if the person is in their dorm. If the person is on the premises of the reception centre, they are asked  
21  
22 to come to the reception desk and talk with the research nurse. Otherwise, a new reach-out appointment is  
23  
24 booked up to three times, unless the person expresses explicit decline from participation to reception  
25  
26 centre personnel.  
27  
28  
29

30  
31 Asylum seekers living in other reception centres or in private housing are also approached through the  
32  
33 reception centre as no personal contact information is initially available. The research nurse or the project  
34  
35 coordinator contact the reception centre director via e-mail and explain the purpose of the study. Following  
36  
37 this, the research nurse contacts the reception centre for specific arrangements. Telephone contact  
38  
39 information is usually available for persons living in private housing and in such case the research nurse  
40  
41 contacts persons invited to participate directly by telephone. In case of unaccompanied minors, the initial  
42  
43 contact is with the reception centre to enquire for contact details of the legal guardian, who is approached  
44  
45 by e-mail or by telephone by the research coordinator. If the legal guardian gives consent, the  
46  
47 unaccompanied minor is contacted and invited to participate in the study.  
48  
49  
50

51  
52 Two hours are booked in the research nurses schedule for each reach out time, which allows for conduct of  
53  
54 the study straight away if the person agrees to participate. Alternatively, another time is agreed upon. Prior  
55  
56 to starting the interview and the health examination, the research nurse confirms the identity of the  
57  
58 participant by checking their personal identification card. Participants are provided with detailed written  
59  
60

1  
2  
3 information about the study, including the purpose of the study, how the collected information will be  
4 used, data protection, the rights of participants and who is responsible for conduct of the study. If written  
5 information is not available in the language spoken by the asylum seeker or the person is illiterate, the  
6 research nurse goes through written information with assistance of the professional interpreter. The  
7 purpose of the study is explained to minors in an age-appropriate manner.  
8  
9

10  
11  
12  
13  
14  
15 Participants are asked to sign written informed consent. Separate consent is acquired for: 1) the use of the  
16 data for research and development purposes within the National Institute for Health and Welfare; 2)  
17 sharing anonymised data with researchers outside the institute; 3) record linkage of electronic patient  
18 register data to survey data; 4) record linkage of national register data to survey data if asylum is granted in  
19 Finland. Guardians of minors sign informed consent. Additionally, children aged 7 years and older also give  
20 written informed consent. The consent form is designed in age-appropriate manner.  
21  
22  
23  
24  
25  
26  
27  
28  
29  
30  
31

### 32 **2.3 Data collection**

33  
34  
35 The study consists of a standardised face-to-face interview and a health examination. Duration of the study  
36 is approximately 1 hour if conducted in the mother tongue of the participant and approximately 2 hours if  
37 an interpreter is used. Some of the questions concerning mental health as well as sexual and reproductive  
38 health can be completed as self-administered questionnaires during the interview. The research nurse  
39 records whether these were interviewed or self-completed by the participants. Interviews and health  
40 examinations have been tailored for four age groups: 1) adults; 2) 13-17 year-olds; 3) 7-12 year-olds and 4)  
41 0-6 years. Adults and 13-17 year-olds provide their own answers for the interview, whereas the guardians  
42 of 0-12 year-olds answer to the interview questions concerning children. Minors aged 0-12 years  
43 participate only in the health examination. Research nurses received extensive training over the course of  
44 eight days on research methods, purpose and content of the study, interview techniques as well as on  
45 conduct of standardised interview and health examination. Quality control of data collection is also  
46  
47  
48  
49  
50  
51  
52  
53  
54  
55  
56  
57  
58  
59  
60

1  
2  
3 monitored at different stages of data collection following the European Health Examination Survey (EHES)  
4  
5 fieldwork quality control guidelines (24).  
6  
7  
8  
9

### 10 11 **Face-to-face interview** 12

13  
14 The face-to-face interview consists of measures used for assessment of the health, wellbeing, service needs  
15  
16 of asylum seekers as well as for identification of vulnerable populations. Use of simple language was taken  
17  
18 into account. When appropriate, selected measures are comparable with those used in other population-  
19  
20 based surveys conducted among the general population as well as among populations of migrant origin  
21  
22 permanently living in Finland. The content of the interview by age group is outlined in Table 2. The themes  
23  
24 covered in the interview for adults include sociodemographics, asylum seeking journey, literacy, previous  
25  
26 socioeconomic status, health status, sexual and reproductive health, traumatic events, mental health,  
27  
28 health behaviour and social networks. The interview for children under the age of 18 covers similar themes  
29  
30 when relevant. Additionally, early childhood and development are also covered.  
31  
32  
33

34  
35 [Table 2 about here]  
36  
37  
38  
39  
40  
41  
42  
43  
44  
45  
46  
47  
48  
49  
50  
51  
52  
53  
54  
55  
56  
57  
58  
59  
60

### ***Health examination***

Health examination measurements are carried out following EHES protocol (24). The content of the health examination is outlined in Table 3. The health examination of adults and 13-17 year-olds consists of standardised measurements of weight, height, waist circumference, upper arm circumference, blood pressure, and a dental examination. For children belonging to the 7-12 years age group, health examination consists of measurements of weight and height, dental examination and evaluation of condition of the skin. The health examination of children aged 0-6 years consists of evaluation of the condition of the skin and examination for Bacillus Calmette-Guérin (BCG) scar.

[Table 3 about here]

### ***Linkage with register-based data***

Upon separate consent, data collected during the TERTTU Survey can be supplemented with unified national electronic health record (EHR) data of the reception centres on the basis of the unique personal identity number. This allows for following the health of asylum seekers from the initial point of arrival to Finland throughout the entire reception processes. Upon a separate consent, data collected during the TERTTU Survey can be supplemented with data from the national registers on the health, wellbeing and health service use of those who have been granted an asylum (Table 4). Feasibility of this record linkage will be evaluated after a follow-up period. Record linkage with national registers provides with a unique opportunity to examine how the health of asylum seekers evolves throughout their life course.

[Table 4 about here]

### ***Linkage with biological data from the Immunity Against Vaccine Preventable Diseases Study***

Parallel to the TERTTU Survey, a cross-sectional Immunity Against Vaccine Preventable Diseases Study is conducted between 2018 and 2019. The aim of the Immunity Against Vaccine Preventable Diseases Study is to assess previous immunity against measles, mumps, rubella, diphtheria, tetanus and polio among asylum seekers coming from countries with higher incidence of vaccine preventable diseases (25). The study recruits all asylum seekers from Afganistan, Iraq, Russia and Somalia who have not yet received vaccines in Finland, with the aim of gathering a minimum 100 samples per each study group. Blood samples are drawn in connection with the voluntary multiphasic screening for blood-borne and sexually transmitted infections currently offered to all asylum seekers during the initial health assessment. Nurses working in transit centers are responsible for recruitment of study participants. Participants provide written informed consent. Upon a separate consent, results from the Immunity Against Vaccine Preventable Diseases Study can be linked with information on sociodemographics and self-reported history of vaccinations collected during the TERTTU Survey. The Immunity Against Vaccine Preventable Diseases Study is coordinated by the National Institute for Health and Welfare and funded by the National Vaccination Program. The study has been approved by the Coordinating Ethics Committee of the Helsinki and Uusimaa Hospital District (HUS/3330/2017).

#### **2.4 Power and data analysis**

The aim is to gather data on a minimum of 1000 newly arrived asylum seekers. Of the 1000 participants, the projected sample sizes in each age group are 700 for adults and 100 for each of the minor groups (0-6 years, 7-12 years and 13-17 years). An estimate for a sample of 700 would have a confidence interval of roughly  $\pm 3.5\%$ , and  $\pm 5\%$  when examined by sex ( $n=350$ ). A sample of 100 for each minor age group would result to confidence intervals of  $\pm 10\%$  or less. Projected confidence intervals will produce estimates of adequate accuracy (26). The minimum sample size for the study was calculated manually. The limited

1  
2  
3 project time frame and resources restrict using an ideally larger sample. The formula for calculations is  
4 enclosed as supplementary material [Link to Supplement Figure 2].  
5  
6  
7

8 The main findings of the study will be reported as a report focusing on basic findings as mean and median  
9 values, as well as proportions and their confidence intervals. These will be presented separately for adults,  
10 13-17 year-olds, 7-12 year-olds and 0-6 year-olds, and by regions of origin. The categories for regions of  
11 origin will depend on the final number of participants from different regions. Groupings will be made  
12 according to established regional categories, for example according to the United Nations Statistics Division  
13 groupings (27) or the World Bank regional groupings (28). The effect of non-response will be assessed  
14 based on age, sex and country of origin of all asylum seekers registered in the national electronic asylum  
15 database maintained by the Finnish Immigration Service. Based on these analyses, sample weights will be  
16 calculated, if necessary, to correct for the effect of non-response.  
17  
18  
19  
20  
21  
22  
23  
24  
25  
26  
27  
28

29 Following the publication of the basic report, data will be made available to researchers for in-depth  
30 analyses. Total population sampling allows to examine family units. This provides with a unique opportunity  
31 to examine how the health, wellbeing and health service needs of, for example, parents influence those of  
32 their children in later in-depth analyses. These regression analyses will be carried out using a mixed model  
33 that includes family unit as a random effect.  
34  
35  
36  
37  
38  
39  
40  
41  
42  
43  
44

## 45 **2.5 Patient and Public Involvement**

46  
47 The study was designed to fill the gap in knowledge on the health, wellbeing and health service use among  
48 asylum seekers. The study was designed consulting a consortium of experts on the topic of the health and  
49 wellbeing of asylum seekers. Persons with asylum seeker background were included into the steering  
50 committee and have provided their insights on the content of the study. No patients were directly involved  
51 in recruitment or conduct of the study. Results of the study benefit participants in that they receive  
52 information on their health and are consulted to seek further medical advice if a need for such is identified  
53  
54  
55  
56  
57  
58  
59  
60

1  
2  
3 over the course of the study. Results will be disseminated in reception centres and through media and  
4  
5 reports on a national level.  
6  
7  
8  
9

### 10 11 12 **3 Ethics and Dissemination** 13

#### 14 15 16 *Ethical aspects* 17

18  
19 Participation in the TERTTU Survey is based on voluntary informed written consent. Participants are  
20  
21 informed concerning personal data protection, sovereignty of the study in terms of the person's asylum  
22  
23 seeking process and confidentiality of the answers. It is made clear that the TERTTU Survey does not  
24  
25 substitute the initial health assessment provided by the reception centres. Furthermore, participants are  
26  
27 informed that they are fully entitled to decline from participation or interrupt participation at any moment  
28  
29 without the need for providing a reason and that they are also entitled to request deletion of their data.  
30  
31 Participants are also informed that they are entitled to leave some questions unanswered and that they  
32  
33 may refuse any measurement.  
34  
35

36  
37 All of the data is collected during a one-on-one research appointment. None of the data collected during  
38  
39 the study is shared with a third person (for example spouse, parent of 13-17 year-olds who participate  
40  
41 independently, or reception centre personnel). Research nurses are bound by a confidentiality clause and  
42  
43 have been trained in key principles of research ethics. Professional interpreters provide their services via  
44  
45 the telephone, which provides a higher degree of confidentiality for the participant.  
46  
47

48  
49 Participants are given oral and written feedback on their health examination measures. If a need for further  
50  
51 health care services arises over the course of the survey visit, research nurses recommend participants to  
52  
53 contact the reception centre nurse. All of the TERTTU Survey data is managed following the National  
54  
55 Institute for Health and Welfare's protocol for handling sensitive data. Each study participant is given a  
56  
57 random study ID number and data is handled without personal identification information.  
58  
59  
60



1  
2  
3 Incentives (for example bus cards, toy packages for children) valued at approximately 10 euros are given to  
4  
5 all participants. The TERTTU Survey has been approved by the Coordinating Ethics Committee of the  
6  
7 Helsinki and Uusimaa Hospital District (reference number HUS/3306/2017).  
8  
9

### 10 11 12 13 ***Dissemination of information about the TERTTU Survey*** 14

15  
16 Information about the TERTTU Survey is broadly disseminated both at national and international level at all  
17  
18 stages of the study. Since the TERTTU Survey has been specifically designed to bridge the gap in knowledge  
19  
20 on the health and wellbeing of asylum seekers in Finland, Ministry of Interior, Ministry of Social Welfare  
21  
22 and Health and Ministry of Economic Affairs and Employment are regularly updated on the progress of the  
23  
24 study and these updates are transferred into various country reports compiled by the ministries. The  
25  
26 TERTTU Survey has been presented to a number of international collaborators and at several international  
27  
28 congresses. Possibilities for research collaboration with international partners will be explored.  
29  
30  
31

32  
33 The main findings of the baseline TERTTU Survey will be reported by the end of summer 2019 and they will  
34  
35 be widely disseminated at both national and international level. Following this, TERTTU Survey data will be  
36  
37 available for research purposes upon an accepted study proposal. Evidence-based health examination  
38  
39 protocol will be developed and disseminated across reception centres on a national level by the end of  
40  
41 2019.  
42  
43  
44  
45  
46  
47  
48

### 49 **Acknowledgements** 50

51  
52 The authors would like to acknowledge experts at the Finnish Immigration Service and all of the personnel  
53  
54 of collaborating reception centres for their substantial efforts in facilitating implementation of the study. All  
55  
56 of the participants in the study, the research nurses involved in baseline data collection, the  
57  
58 multidisciplinary consortium of experts from the National Institute for Health and Welfare and  
59  
60

1  
2  
3 collaborating bodies as well as the steering committee of the Developing the health examination protocol  
4  
5 for asylum seekers in Finland project also need to be acknowledged. Finally, the authors would like to  
6  
7 acknowledge Sinikka Kytö and Kaaren Erhola for the graphical visualization of the TERTTU Survey material.  
8  
9

## 10 11 12 13 14 **Author contributions**

15  
16  
17  
18 AC and OS conceptualised the initial idea for the national-level project aiming at developing the health  
19  
20 examination protocol for asylum seekers in Finland within which the TERTTU Survey is implemented. AC  
21  
22 developed the original grant proposal. NS, AC, PK, KL and EL have been involved in planning and  
23  
24 coordination of the study. OS has been the main contact on the behalf of the collaborating partner (Finnish  
25  
26 Immigration Service). PT has been involved in the design and coordination of the Immunity Against Vaccine  
27  
28 Preventable Diseases Study. NS prepared the first draft of the manuscript. All authors (AC, PK, KL, PT, OS,  
29  
30 NS) have provided critical feedback and contributed to revision of the manuscript. All authors have read  
31  
32 and approved the final manuscript.  
33  
34  
35

## 36 37 **Funding**

38  
39  
40 TERTTU Survey is implemented as a part of the Developing the health examination protocol for asylum  
41  
42 seekers in Finland: A national development project funded by the EU Asylum, Migration and Integration  
43  
44 Fund.  
45  
46  
47

## 48 49 **Competing interests**

50  
51 The authors declare no competing interests.  
52  
53  
54  
55  
56  
57  
58  
59  
60

## References

- (1) Bozorgmehr K, Goosen S, Mohsenpour A, Kuehne A, Razum O, Kunst AE. How Do Countries' Health Information Systems Perform in Assessing Asylum Seekers' Health Situation? Developing a Health Information Assessment Tool on Asylum Seekers (HIATUS) and Piloting It in Two European Countries. *Int J Environ Res Public Health* 2017 Aug 8;14(8):10.3390/ijerph14080894.
- (2) Bozorgmehr K, Razum O. Forced Migration and Global Responsibility for Health Comment on "Defining and Acting on Global Health: The Case of Japan and the Refugee Crisis". *Int J Health Policy Manag* 2016 Nov 5;6(7):415-418.
- (3) European Union. Who qualifies for international protection. Accessed on June 1, 2018 from [https://ec.europa.eu/home-affairs/what-we-do/policies/asylum/refugee-status\\_en](https://ec.europa.eu/home-affairs/what-we-do/policies/asylum/refugee-status_en). 2018.
- (4) Alberer M, Malinowski S, Sanftenberg L, Schelling J. Notifiable infectious diseases in refugees and asylum seekers: experience from a major reception center in Munich, Germany. *Infection* 2018 Jun;46(3):375-383.
- (5) van Berlaer G, Bohle Carbonell F, Manantsoa S, de Bethune X, Buyl R, Debacker M, et al. A refugee camp in the centre of Europe: clinical characteristics of asylum seekers arriving in Brussels. *BMJ Open* 2016 Nov 24;6(11):e013963-2016-013963.
- (6) Bloch-Infanger C, Battig V, Kremo J, Widmer AF, Egli A, Bingisser R, et al. Increasing prevalence of infectious diseases in asylum seekers at a tertiary care hospital in Switzerland. *PLoS One* 2017 Jun 15;12(6):e0179537.
- (7) Leiler A, Bjarta A, Ekdahl J, Wasteson E. Mental health and quality of life among asylum seekers and refugees living in refugee housing facilities in Sweden. *Soc Psychiatry Psychiatr Epidemiol* 2018 Dec 22.
- (8) Georgiadou E, Morawa E, Erim Y. High Manifestations of Mental Distress in Arabic Asylum Seekers Accommodated in Collective Centers for Refugees in Germany. *Int J Environ Res Public Health* 2017 Jun 7;14(6):10.3390/ijerph14060612.
- (9) Bozorgmehr K, Schneider C, Joos S. Equity in access to health care among asylum seekers in Germany: evidence from an exploratory population-based cross-sectional study. *BMC Health Serv Res* 2015 Nov 9;15:502-015-1156-x.
- (10) Schneider C, Joos S, Bozorgmehr K. Disparities in health and access to healthcare between asylum seekers and residents in Germany: a population-based cross-sectional feasibility study. *BMJ Open* 2015 Nov 4;5(11):e008784-2015-008784.
- (11) Buber-Ennser I, Kohlenberger J, Rengs B, Al Zalak Z, Goujon A, Striessnig E, et al. Human Capital, Values, and Attitudes of Persons Seeking Refuge in Austria in 2015. *PLoS One* 2016 Sep 23;11(9):e0163481.
- (12) Pavli A, Maltezou H. Health problems of newly arrived migrants and refugees in Europe. *J Travel Med* 2017 Jul 1;24(4):10.1093/jtm/tax016.
- (13) Tiittala P, Tuomisto K, Puumalainen T, Lyytikäinen O, Ollgren J, Snellman O, et al. Public health response to large influx of asylum seekers: implementation and timing of infectious disease screening. *BMC Public Health* 2018 Sep 24;18(1):1139-018-6038-9.

1  
2  
3  
4  
5  
6  
7  
8  
9  
10  
11  
12  
13  
14  
15  
16  
17  
18  
19  
20  
21  
22  
23  
24  
25  
26  
27  
28  
29  
30  
31  
32  
33  
34  
35  
36  
37  
38  
39  
40  
41  
42  
43  
44  
45  
46  
47  
48  
49  
50  
51  
52  
53  
54  
55  
56  
57  
58  
59  
60

- (14) Tiittala P SE. Asylum seekers' access to mental health and dental health services, and prevention of infection disease problems in Finland in 2017. Research brief 10 National Institute for Health and Welfare, Helsinki, Finland 2018.
- (15) Tiittala P, Räisänen P, Lilja E, Castaneda A, Snellman O, Helve O, et al. Healthcare service use and health concerns among asylum seekers in Finland in 2015–2016. Data brief 29, National Institute for Health and Welfare, Helsinki, Finland. Accessed on January 19, 2019 from <http://urn.fi/URN:ISBN:978-952-343-187-4>. 2018.
- (16) Skogberg N, Laatikainen T, Jula A, Harkanen T, Vartiainen E, Koponen P. Contribution of sociodemographic and lifestyle-related factors to the differences in metabolic syndrome among Russian, Somali and Kurdish migrants compared with Finns. *Int J Cardiol* 2017 Apr 1;232:63-69.
- (17) Rask S, Sainio P, Castaneda AE, Harkanen T, Stenholm S, Koponen P, et al. The ethnic gap in mobility: a comparison of Russian, Somali and Kurdish origin migrants and the general Finnish population. *BMC Public Health* 2016 Apr 18;16:340-016-2993-1.
- (18) Rask S, Suvisaari J, Koskinen S, Koponen P, Molsa M, Lehtisalo R, et al. The ethnic gap in mental health: A population-based study of Russian, Somali and Kurdish origin migrants in Finland. *Scand J Public Health* 2016 May;44(3):281-290.
- (19) Bozorgmehr K, Razum O. Effect of Restricting Access to Health Care on Health Expenditures among Asylum-Seekers and Refugees: A Quasi-Experimental Study in Germany, 1994-2013. *PLoS One* 2015 Jul 22;10(7):e0131483.
- (20) Bozorgmehr K, Wenner J, Razum O. Restricted access to health care for asylum-seekers: applying a human rights lens to the argument of resource constraints. *Eur J Public Health* 2017 Aug 1;27(4):592-593.
- (21) National Institute for Health and Welfare. Developing the health examination protocol for asylum seekers in Finland: A national development project (TERTTU). 2018; Available at: <https://thl.fi/en/web/thlfi-en/research-and-expertwork/projects-and-programmes/developing-the-health-examination-protocol-for-asylum-seekers-in-finland-a-national-development-project-terttu>. Accessed November, 2018.
- (22) Helve O, Tuomisto K, Tiittala P, Puumalainen T. Asylum seekers' health care in Finland in 2015–2016. Report on a survey of reception centres. Helsinki, Finland 2016. ISBN 978-952-302-774-9 (printed); ISBN 978-952-302-775-6 (pdf). Accessed on January 15, 2019 from: <http://urn.fi/URN:ISBN:978-952-302-775-6>. National Institute for Health and Welfare 2016;19.
- (23) Abubakar I, Aldridge RW, Devakumar D, Orcutt M, Burns R, Barreto ML, et al. The UCL-Lancet Commission on Migration and Health: the health of a world on the move. *Lancet* 2018 Dec 15;392(10164):2606-2654.
- (24) Tolonen H. Part B, Fieldwork Procedures. *Directions* 2016\_14. Accessed on July 1, 2018 from: <http://urn.fi/URN:ISBN:978-952-302-701-5>. 2016.
- (25) Mipatrini D, Stefanelli P, Severoni S, Rezza G. Vaccinations in migrants and refugees: a challenge for European health systems. A systematic review of current scientific evidence. *Pathog Glob Health* 2017;111(2):59-68.
- (26) Lwanga SK, Lemeshow S. Sample size determination in health studies : a practical manual. Geneva: World Health Organization. <http://www.who.int/iris/handle/10665/40062>. 1991.

1  
2  
3 (27) United Nations Statistics Division. Methodology: Standard country or area codes for statistical use.  
4 Accessed on January 23, 2019 from: <https://unstats.un.org/unsd/methodology/m49/>. 2019.  
5

6 (28) The World Bank. Data: World Bank Country and Lending Groups. Accessed on January 23, 2019  
7 from: [https://datahelpdesk.worldbank.org/knowledgebase/articles/906519-world-bank-country-and-](https://datahelpdesk.worldbank.org/knowledgebase/articles/906519-world-bank-country-and-lending-groups)  
8 [lending-groups](https://datahelpdesk.worldbank.org/knowledgebase/articles/906519-world-bank-country-and-lending-groups). 2019.  
9

10 (29) UNESCO Institute of Statistics. International Standard Classification of Education ISCED 2011. Accessed  
11 on October 19, 2018 from: [http://uis.unesco.org/sites/default/files/documents/international-standard-](http://uis.unesco.org/sites/default/files/documents/international-standard-classification-of-education-isced-2011-en.pdf)  
12 [classification-of-education-isced-2011-en.pdf](http://uis.unesco.org/sites/default/files/documents/international-standard-classification-of-education-isced-2011-en.pdf). 2012.  
13  
14

15 (30) Eurostat. European Health Interview Survey (EHIS Wave 3). Methodological manual. Luxembourg,  
16 Publications office of the European Union. Accessed on October 19, 2018 from:  
17 [https://ec.europa.eu/eurostat/documents/3859598/8762193/KS-02-18-240-EN-N.pdf/5fa53ed4-4367-](https://ec.europa.eu/eurostat/documents/3859598/8762193/KS-02-18-240-EN-N.pdf/5fa53ed4-4367-41c4-b3f5-260ced9ff2f6)  
18 [41c4-b3f5-260ced9ff2f6](https://ec.europa.eu/eurostat/documents/3859598/8762193/KS-02-18-240-EN-N.pdf/5fa53ed4-4367-41c4-b3f5-260ced9ff2f6). 2018.  
19  
20

21 (31) Pynoos R, Rodriguez N, Steinberg A, Stuber M, & Frederick C. UCLA PTSD Index for DSM-IV. Accessed  
22 on October 19, 2018 from:  
23 <https://www.mc.vanderbilt.edu/coe/tfcbt/workbook/Assessment/UCLA%20PTSD%20Index-%20Parent.pdf>.  
24 1998.  
25

26 (32) Loeb M, Cappa C, Cialesi R, de Palma E. Measuring child functioning: the Unicef/ Washington Group  
27 Module. *Salud Publica Mex* 2017 Jul-Aug;59(4):485-487.  
28  
29

30 (33) Mollica RF, Caspi-Yavin Y, Bollini P, Truong T, Tor S, Lavelle J. The Harvard Trauma Questionnaire.  
31 Validating a cross-cultural instrument for measuring torture, trauma, and posttraumatic stress disorder in  
32 Indochinese refugees. *J Nerv Ment Dis* 1992 Feb;180(2):111-116.  
33  
34

35 (34) Derogatis LR, Lipman RS, Rickels K, Uhlenhuth EH, Covi L. The Hopkins Symptom Checklist (HSCL): a  
36 self-report symptom inventory. *Behav Sci* 1974 Jan;19(1):1-15.  
37

38 (35) Dimitrova M, Gologanova K, Friele B, Rueffer J., Kroo A, Szilvia K, et al. PROTECT - Process of  
39 recognition and Orientation of Torture Victims in European Countries to Facilitate Care and Treatment.  
40 Accessed on October 4, 2018 from: [http://protect-able.eu/wp-content/uploads/2013/01/protect-global-](http://protect-able.eu/wp-content/uploads/2013/01/protect-global-eng.pdf)  
41 [eng.pdf](http://protect-able.eu/wp-content/uploads/2013/01/protect-global-eng.pdf).  
42  
43

44 (36) Bush K, Kivlahan DR, McDonnell MB, Fihn SD, Bradley KA. The AUDIT alcohol consumption questions  
45 (AUDIT-C): an effective brief screening test for problem drinking. Ambulatory Care Quality Improvement  
46 Project (ACQUIP). Alcohol Use Disorders Identification Test. *Arch Intern Med* 1998 Sep 14;158(16):1789-  
47 1795.  
48

49 (37) ESPAD. Questionnaire of Substance Use. The European School Survey Project on Alcohol and Other  
50 Drugs. Accessed on October 4, 2018 from:  
51 [http://www.espad.org/sites/espad.org/files/ESPAD\\_Questionnaire\\_2011.pdf](http://www.espad.org/sites/espad.org/files/ESPAD_Questionnaire_2011.pdf). 2011.  
52  
53  
54  
55  
56  
57  
58  
59  
60

**Table 1 Stages of the TERTTU Survey****Baseline data collection**

|                |                                                                                                                                                                                       |
|----------------|---------------------------------------------------------------------------------------------------------------------------------------------------------------------------------------|
| 3-10/2017      | Planning the data collection of the baseline TERTTU Survey.                                                                                                                           |
| 9/2017-1/2018  | Receiving Coordinating Ethics Committee of the Helsinki and Uusimaa Hospital District permission for implementing baseline and follow-up studies.                                     |
| 11/2017        | Piloting the TERTTU Survey among volunteers with asylum seeker background.                                                                                                            |
| 12/2017-1/2018 | Recruitment of the research nurses.                                                                                                                                                   |
| 2/2018         | Training of the research nurses.                                                                                                                                                      |
| 3/2018-12/2018 | Baseline data collection.                                                                                                                                                             |
| 2/2019-4/2019  | Data management, data quality assessment and analysis.                                                                                                                                |
| 5-6/2019       | Reporting basic findings.                                                                                                                                                             |
| 7/2019 -       | Data available for research purposes to other researchers upon an accepted study proposal by the National Institute for Health and Welfare.                                           |
| 7-12/2019      | Dissemination of the main findings of the baseline TERTTU Survey and use for evidence-based development of the national health examination protocol for newly arrived asylum seekers. |

**1. Follow-up of TERTTU Survey participants**

|              |                                                                                                                                            |
|--------------|--------------------------------------------------------------------------------------------------------------------------------------------|
| 2020 onwards | Linkage of reception centre electronic health records to baseline TERTTU Survey data based on unique asylum process identification number. |
|--------------|--------------------------------------------------------------------------------------------------------------------------------------------|

**2. Follow-up of baseline TERTTU Survey participants**

|              |                                                                                                                              |
|--------------|------------------------------------------------------------------------------------------------------------------------------|
| 2020 onwards | Feasibility of linking national register data to baseline TERTTU Survey data among persons granted asylum will be evaluated. |
|--------------|------------------------------------------------------------------------------------------------------------------------------|

**Table 2 Content of the interview of the Asylum Seekers Health and Wellbeing Survey (TERTTU)**

| Themes                          | Variable/measure                                                             | Questionnaire instrument/measures                                                                                                                                                                    | Age group                 |
|---------------------------------|------------------------------------------------------------------------------|------------------------------------------------------------------------------------------------------------------------------------------------------------------------------------------------------|---------------------------|
| Sociodemographics               | Age, sex, year of birth, mother tongue, prior country of permanent residence | -                                                                                                                                                                                                    | Adults<br>0-17 year-olds  |
| Asylum seeking journey          | Year when left permanent residence, route to Finland                         | Countries, types of housing and duration of stay in these locations during the asylum journey                                                                                                        | Adults<br>0-17 year-olds  |
| Literacy                        | Language skills, reading and writing skills                                  | Mastery of languages other than mother tongue, ability to read and write (7+ year-olds)                                                                                                              | Adults<br>0-17 year-olds  |
| Previous socioeconomic status   | Education, occupation                                                        | International Standard Classification of Education (ISCED-2011) (29), prior occupation                                                                                                               | Adults                    |
| Health status                   | Self-rated health, presence of long-term conditions                          | Minimum European Health Module (MEHM) (30)                                                                                                                                                           | Adults<br>0-17 year-olds  |
|                                 | Chronic and infectious diseases, medications, current physical symptoms      | Various health conditions diagnosed by a physician, need for regular medication, current medication, various somatic symptoms, tuberculosis symptoms, prior infectious diseases, vaccination history | Adults<br>0-17 year-olds  |
|                                 | Functional capacity                                                          | adapted from Washington Group Module (31)<br>adapted from Unicef/ Washington Group Module (32)                                                                                                       | Adults<br>0-17 year-olds  |
| Early childhood and development | Gestation, early life development                                            | Gestation week at birth, complications during birth, birth weight, height, early life development milestones                                                                                         | 0-12 year-olds            |
|                                 | Growth and development                                                       | Previously identified problems in growth and development                                                                                                                                             | 0-17 year-olds            |
| Sexual and reproductive health  | Sexual behaviour                                                             | Questions related to risk behavior predisposing to sexually transmitted diseases                                                                                                                     | Adults<br>13-17 year-olds |
|                                 | Male circumcision/female genital mutilation                                  | Age of circumcision (if circumcised), problems associated with female genital mutilation                                                                                                             | Adults<br>0-17 year-olds  |
|                                 | Pregnancies and births                                                       | Number of pregnancies, miscarriages, abortions, parity                                                                                                                                               | Adults<br>13-17 year-olds |
| Traumatic events                | Physical trauma due to accident/violence                                     | Types of injuries before/during asylum journey                                                                                                                                                       | Adults                    |
|                                 | Potentially traumatic life events                                            | Various traumatic life events, adapted from Harvard Trauma Questionnaire (33)                                                                                                                        | Adults                    |
|                                 |                                                                              | Potentially traumatic events, adapted from UCLA PTSD INDEX FOR DSM-IV (31)                                                                                                                           | 0-17 year-olds            |

1  
2  
3  
4  
5  
6  
7  
8  
9  
10  
11  
12  
13  
14  
15  
16  
17  
18  
19  
20  
21  
22  
23  
24  
25  
26  
27  
28  
29  
30  
31  
32  
33  
34  
35  
36  
37  
38  
39  
40  
41  
42  
43  
44  
45  
46

|                 |                                         |                                                                                 |                           |
|-----------------|-----------------------------------------|---------------------------------------------------------------------------------|---------------------------|
| Mental health   | Mental health symptoms                  | HSCL-25 (34,35), PROTECT-able SDQ                                               | Adults<br>2-17 year-olds  |
| Health behavior | Smoking                                 | Frequency of smoking, use of different types of tobacco products                | Adults<br>13-17 year-olds |
|                 | Alcohol use                             | Alcohol use, AUDIT-C (36)<br>Alcohol use, adapted from ESPAD questionnaire (37) | Adults<br>13-17 year-olds |
|                 | Drugs                                   | Use of intravenous and other drugs                                              | Adults<br>13-17 year-olds |
|                 | Diet                                    | Intake of selected food items                                                   | Adults<br>0-17 year-olds  |
|                 | Dental health                           | Frequency of brushing teeth, latest visit to a dentist                          | Adults<br>0-17 year-olds  |
| Social networks | Family members, contact with close ones | Whereabouts of close family members, being able to be in touch with close ones  | Adults<br>0-17 year-olds  |

PROTECT, Process of recognition and Orientation of Torture Victims in European Countries to Facilitate Care and Treatment; AUDIT-C, AUDIT Alcohol Consumption Questionnaire; ESPAD, The European School Survey Project on Alcohol and Other Drugs.



**Table 3 Content of the health examination of the Asylum Seekers Health and Wellbeing Survey (TERTTU)**

| Variable                | Measurement tool                           | Measurement method                                                                                                                                                               | Age group                 |
|-------------------------|--------------------------------------------|----------------------------------------------------------------------------------------------------------------------------------------------------------------------------------|---------------------------|
| Weight                  | Seca 877                                   | Measured wearing no shoes and only light clothing, with no heavy objects in the pockets. If the participant is pregnant, self-reported weight before pregnancy is recorded. (24) | Adults<br>7-17 year-olds  |
| Height                  | Stand-alone stadiometer, Seca 217          | Measured wearing no shoes and standing upright, looking straight ahead. (24)                                                                                                     | Adults<br>7-17 year-olds  |
| Waist circumference     | Soft measuring tape, Hoehstmast            | Measurement taken on bare skin on top of light clothing, half-way between the lowest rib and the top of iliac crest. (24)                                                        | Adults<br>13-17 year-olds |
| Upper arm circumference | Soft measuring tape, Hoehstmast            | Measurement taken on bare skin, with the elbow resting comfortably on the surface of the table at a 90 degree angle.                                                             | Adults<br>13-17 year-olds |
| Blood pressure          | Omron i-C10 digital blood pressure monitor | Measurement taken three times with a one minute interval on bare skin. (24)                                                                                                      | Adults<br>13-17 year-olds |
| Pulse                   | Manually, with a stopwatch                 | Each pulse beat is counted for 60 seconds. (24)                                                                                                                                  | Adults<br>13-17 year-olds |
| Dental examination      | -                                          | Existence of removable teeth prosthesis, number of teeth (without removable teeth prosthesis), standardised evaluation of dental health                                          | Adults<br>7-17 year-olds  |
| Skin condition          | -                                          | Standardised evaluation of skin condition (identification of bruises and rash)                                                                                                   | 0-12 year-olds            |
| BCG scar                | -                                          | Standardised evaluation of the presence of Bacillus Calmette-Guérin (BCG) scar                                                                                                   | 0-6 year-olds             |

1  
2  
3  
4  
5  
6  
7  
8  
9  
10  
11  
12  
13  
14  
15  
16  
17  
18  
19  
20  
21  
22  
23  
24  
25  
26  
27  
28  
29  
30  
31  
32  
33  
34  
35  
36  
37  
38  
39  
40  
41  
42  
43  
44  
45  
46

**Table 4 Potential register linkages in the TERTTU Survey**

| <b>National register</b>                  | <b>Type of information</b>                                                            |
|-------------------------------------------|---------------------------------------------------------------------------------------|
| Population Register Centre                | Place of residence, marital status, nationality                                       |
| Ministry of Employment and the Economy    | Use of employment services, participation in activities for promoting employment      |
| Social Insurance Institution of Finland   | Social benefits and reimbursements for medical costs                                  |
| National Institute for Health and Welfare | Number and reasons for healthcare visits and hospital care, procedures and treatments |
| Statistics Finland                        | Socio-economic position, education and causes of death                                |

## Figure legends

**Figure 1 Conceptual framework of the TERTTU Survey** (Figure 1 preferably reproduced in colour)

**Figure 2 Permanent study locations in transit reception centres**

**Figure 3 Flow chart of the baseline TERTTU Survey**

**Supplement Figure 1 Brief information pamphlet given in connection with booking a time for a reach-out appointment**

(Supplement Figure 1 preferably reproduced in colour)

**Supplement Figure 2 Formula for calculating the sample size of the TERTTU Survey**

1  
2  
3  
4  
5  
6  
7  
8  
9  
10  
11  
12  
13  
14  
15  
16  
17  
18  
19  
20  
21  
22  
23  
24  
25  
26  
27  
28  
29  
30  
31  
32  
33  
34  
35  
36  
37  
38  
39  
40  
41  
42  
43  
44  
45  
46  
47  
48  
49  
50  
51  
52  
53  
54  
55  
56  
57  
58  
59  
60

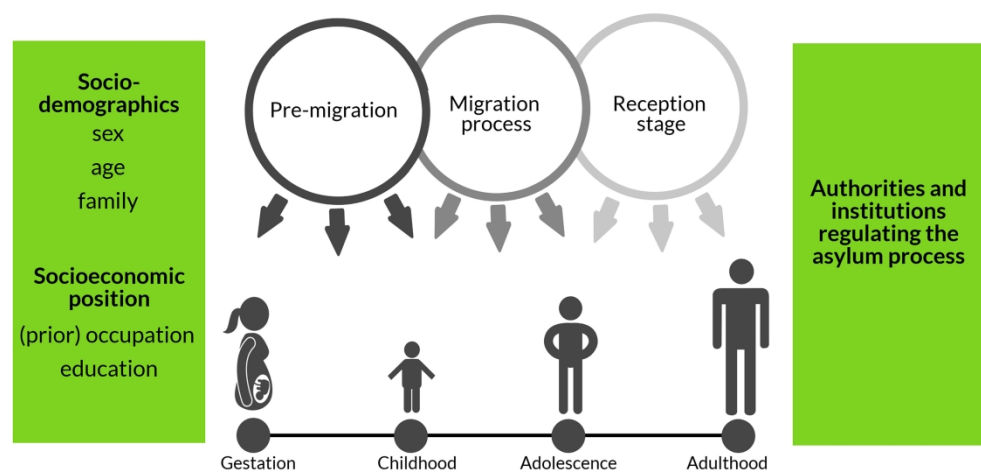

Figure 1 Conceptual framework of the TERTTU Survey

297x145mm (300 x 300 DPI)

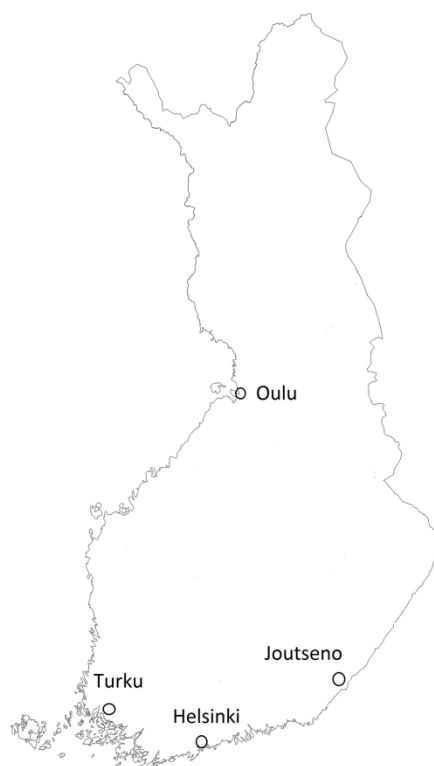

Figure 2 Permanent study locations in transit reception centres

212x299mm (300 x 300 DPI)

1  
2  
3  
4  
5  
6  
7  
8  
9  
10  
11  
12  
13  
14  
15  
16  
17  
18  
19  
20  
21  
22  
23  
24  
25  
26  
27  
28  
29  
30  
31  
32  
33  
34  
35  
36  
37  
38  
39  
40  
41  
42  
43  
44  
45  
46

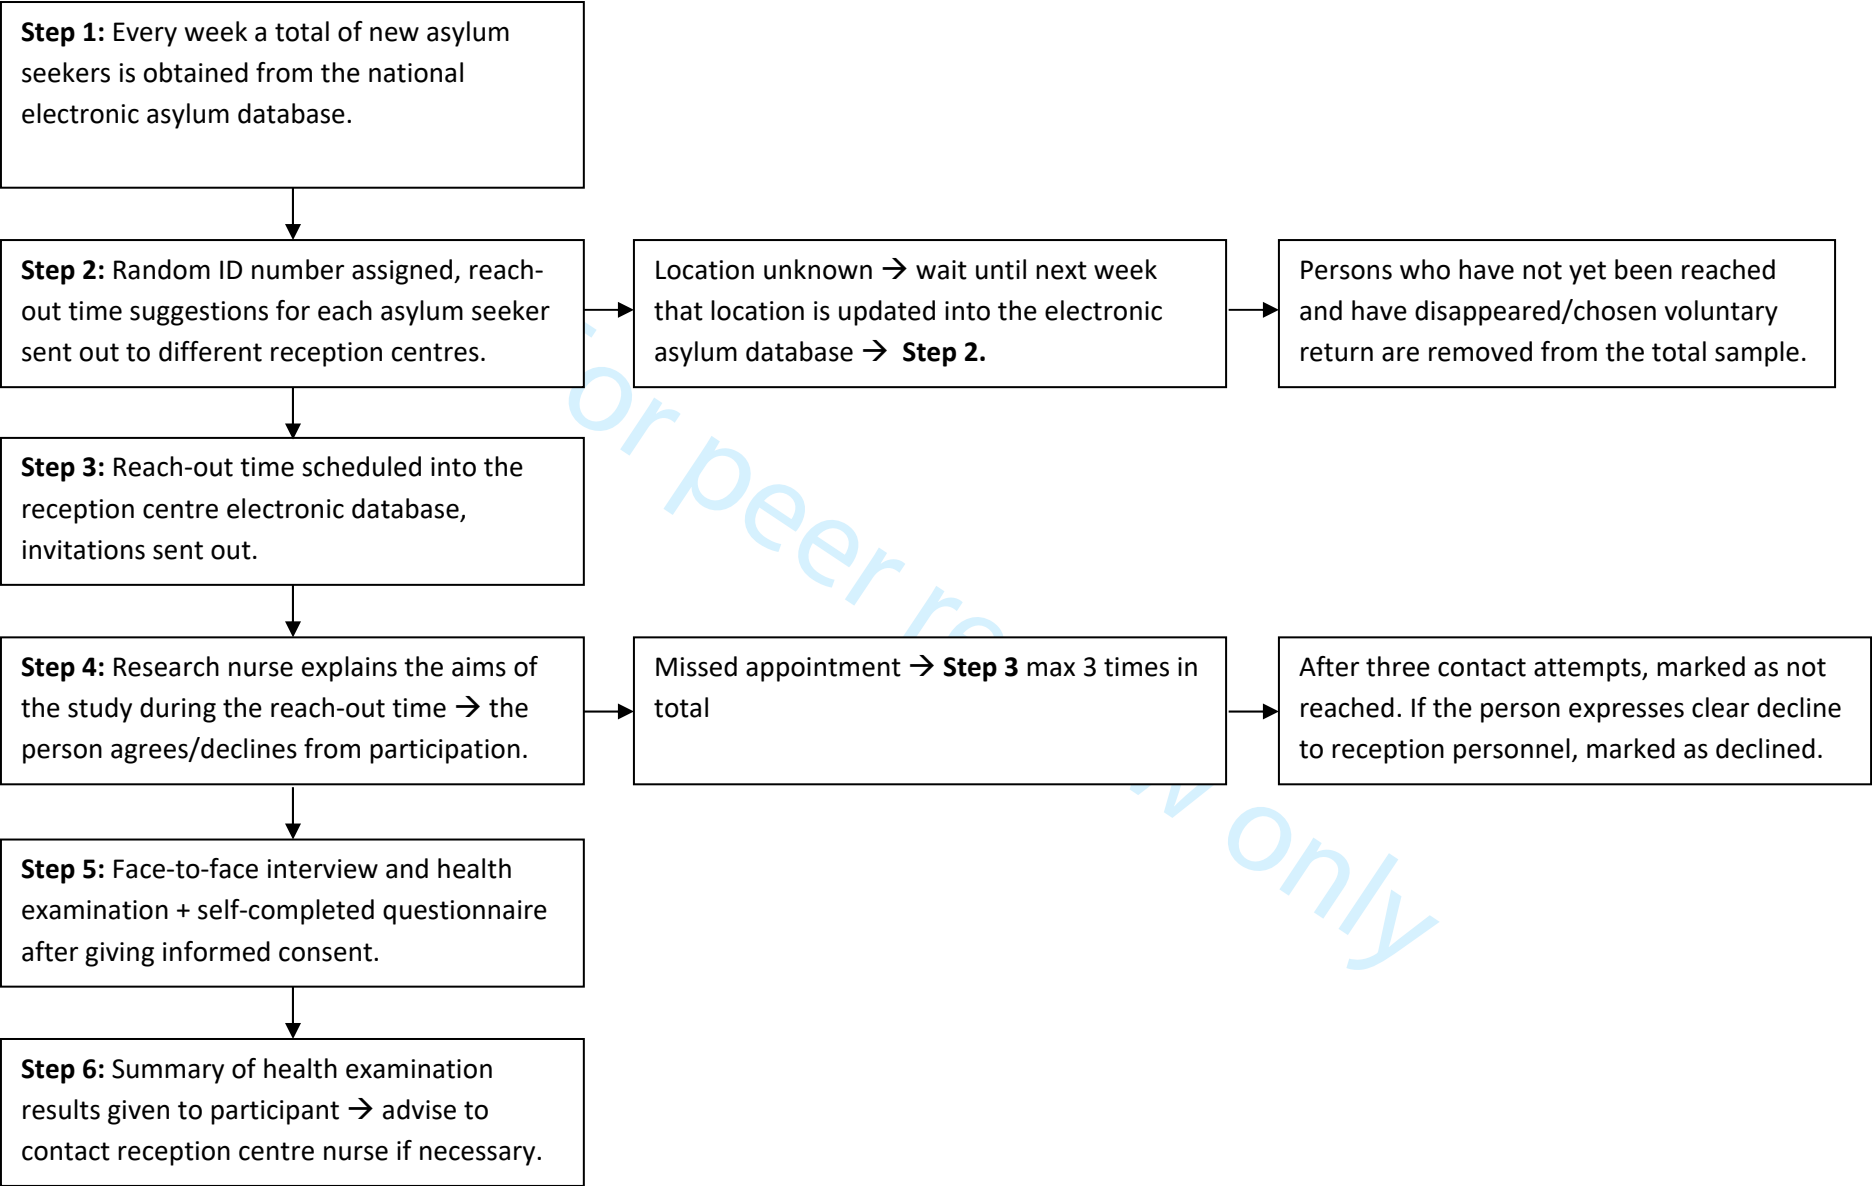

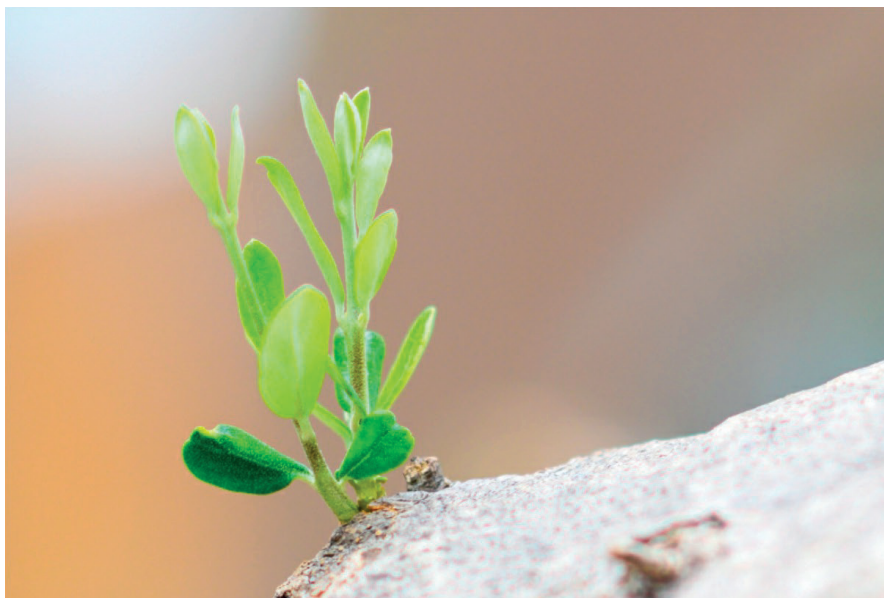

TERTTU promotes the health and wellbeing of asylum seekers through:

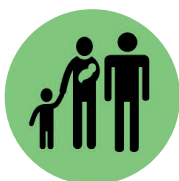

Gathering representative information on the health of newly arrived asylum seekers

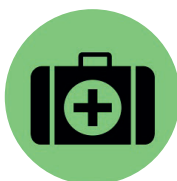

Developing the current health examination protocol

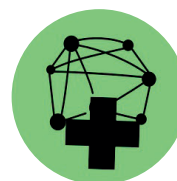

Developing unified practices across reception centers

*Unified practices and evaluation tools.  
Right kind of help at the right time.*

1  
2  
3  
4  
5  
6  
7  
8  
9  
10  
11  
12  
13  
14  
15  
16  
17  
18  
19  
20  
21  
22  
23  
24  
25  
26  
27  
28  
29  
30  
31  
32  
33  
34  
35  
36  
37  
38  
39  
40  
41  
42  
43  
44  
45  
46  
47  
48  
49  
50  
51

# TERTTU

Developing the health examination protocol for newly arrived asylum seekers

## Stages of the project

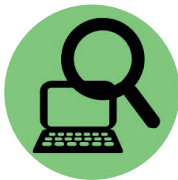

2017  
Overview of current practices, electronic health record analysis

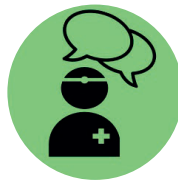

2018  
Conducting a Health and Wellbeing Survey in reception centres

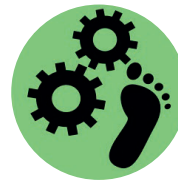

2019  
Developing the health examination protocol

For more information: [www.thl.fi/terttu-project](http://www.thl.fi/terttu-project)

## In co-operation

National Institute for Health and Welfare (THL) • Finnish Immigration Service

Supported by The European Union, the Asylum, Migration and Integration Fund (Amif)



### CONTACT US

**Natalia Skogberg**  
Project Manager, THL  
[natalia.skogberg@thl.fi](mailto:natalia.skogberg@thl.fi)

**Katri-Leena Mustonen**  
Project Coordinator, THL  
[katri-leena.mustonen@thl.fi](mailto:katri-leena.mustonen@thl.fi)



### Notation

|                  |                                                                   |
|------------------|-------------------------------------------------------------------|
| $n$              | sample size                                                       |
| $z_{1-\alpha/2}$ | level of confidence according to the standard normal distribution |
| $P$              | estimated proportion of the population                            |
| $d$              | margin of error                                                   |

Assuming a simple random sample, the estimated population proportion with a specified absolute precision is

$$n = z_{1-\alpha/2}^2 P(1 - P)/d^2 \quad (\text{Lwanga and Lemeshow 1991, p. 25}).$$

This is equivalent with

$$d = z_{1-\alpha/2} \sqrt{\frac{P(1 - P)}{n}}.$$

For a 95 % confidence level  $z_{1-\alpha/2} \approx 1.96$  and for an unknown estimated proportion we use  $P = 0.5$  where the term  $P(1 - P)$  reaches its maximum value. Thus, we get

$$d = 1.96 \sqrt{\frac{0.5(1 - 0.5)}{n}} = \frac{0.98}{\sqrt{n}}.$$

### Example

If  $n = 100$  then  $d = 0.98/\sqrt{100} = 0.098$ .

A sample size of 100 would have a 95 % confidence interval of  $\pm 9.8$  % or less.

# BMJ Open

**The Asylum Seekers Health and Wellbeing (TERTTU) Survey: study protocol for a prospective total population health examination survey on the health and service needs of newly arrived asylum seekers in Finland**

|                                 |                                                                                                                                                                                                                                                                                                                                                                                                                                                                                                                  |
|---------------------------------|------------------------------------------------------------------------------------------------------------------------------------------------------------------------------------------------------------------------------------------------------------------------------------------------------------------------------------------------------------------------------------------------------------------------------------------------------------------------------------------------------------------|
| Journal:                        | <i>BMJ Open</i>                                                                                                                                                                                                                                                                                                                                                                                                                                                                                                  |
| Manuscript ID                   | bmjopen-2018-027917.R2                                                                                                                                                                                                                                                                                                                                                                                                                                                                                           |
| Article Type:                   | Protocol                                                                                                                                                                                                                                                                                                                                                                                                                                                                                                         |
| Date Submitted by the Author:   | 11-Feb-2019                                                                                                                                                                                                                                                                                                                                                                                                                                                                                                      |
| Complete List of Authors:       | Skogberg, N. ; National Institute for Health and Welfare, Helsinki, Finland, Welfare<br>Koponen, Päivikki; National Institute for Health and Welfare, Public Health Solutions<br>Tiittala, Paula; National Institute for Health and Welfare<br>Mustonen, Katri-Leena; National Institute for Health and Welfare, Welfare<br>Lilja, Eero; National Institute for Health and Welfare, Welfare<br>Snellman, Olli; Finnish Immigration Service<br>Castaneda, Anu; National Institute for Health and Welfare, Welfare |
| <b>Primary Subject Heading</b>: | Epidemiology                                                                                                                                                                                                                                                                                                                                                                                                                                                                                                     |
| Secondary Subject Heading:      | Global health, Health services research, Health policy                                                                                                                                                                                                                                                                                                                                                                                                                                                           |
| Keywords:                       | Organisation of health services < HEALTH SERVICES ADMINISTRATION & MANAGEMENT, EPIDEMIOLOGY, Protocols & guidelines < HEALTH SERVICES ADMINISTRATION & MANAGEMENT, asylum seeker and refugee health, Health policy < HEALTH SERVICES ADMINISTRATION & MANAGEMENT                                                                                                                                                                                                                                                 |
|                                 |                                                                                                                                                                                                                                                                                                                                                                                                                                                                                                                  |

SCHOLARONE™  
Manuscripts

1  
2  
3 The Asylum Seekers Health and Wellbeing (TERTTU) Survey: study protocol for a prospective total  
4 population health examination survey on the health and service needs of newly arrived asylum seekers in  
5  
6  
7 Finland  
8

9  
10 Natalia Skogberg<sup>a\*</sup>, Päivikki Koponen<sup>b</sup>, Paula Tiittala<sup>c</sup>, Katri-Leena Mustonen<sup>a</sup>, Eero Lilja<sup>a</sup>, Olli Snellman<sup>d</sup>, Anu  
11  
12 Castaneda<sup>a</sup>.

13  
14  
15  
16 [the surname of each author is underlined]  
17

18  
19  
20  
21 <sup>a</sup>Department of Welfare, National Institute for Health and Welfare, Helsinki, Finland.  
22

23 <sup>b</sup>Department of Public Health Solutions, National Institute for Health and Welfare, Helsinki, Finland;  
24

25 <sup>c</sup>Department of Health Security, National Institute for Health and Welfare, Helsinki, Finland;  
26

27 <sup>d</sup>Finnish Immigration Service, Helsinki, Finland.  
28  
29

30  
31  
32 \*Corresponding author: Natalia Skogberg, Department of Welfare, National Institute for Health and  
33  
34 Welfare; Mannerheimintie 166, PL 30, 00271 Helsinki, Finland; e-mail: natalia.skogberg@thl.fi; telephone:  
35  
36 +358295247916; fax: +358295246111.  
37

38  
39  
40 Keywords: organization of health services, health policy, protocols and guidelines, epidemiology, asylum  
41  
42 seeker and refugee health  
43  
44

45  
46  
47  
48 Word count abstract: 255 words  
49

50  
51 Word count main text: 4074 words  
52  
53  
54  
55  
56  
57  
58  
59  
60

## Abstract

### Introduction

Health, wellbeing and health service needs of asylum seekers have emerged as urgent topics following the arrival of 2.5 million asylum seekers to EU between 2015 and 2016. However, representative information on the health, wellbeing and service needs of asylum seekers is scarce. The aim of the Asylum Seekers Health and Wellbeing (TERTTU) Survey is to 1) gather population-based representative information; 2) identify key indicators for systematic monitoring; 3) produce the evidence-base for development of systematic screening of asylum seekers' health, wellbeing and health service needs.

### Methods and analysis

TERTTU Survey is a population-based prospective study with a total population sample of newly arrived asylum seekers to Finland, including adults and children. Baseline data collection is carried out in reception centres in 2018 and consists of a face-to-face interview, self-administered questionnaire and a health examination following a standardised protocol. Altogether 1000 asylum seekers will be included into the study. Baseline data will be followed up with national electronic health record data encompassing the entire asylum process and later with national register data among persons who are receive residency permits.

### Ethics and dissemination

Ethical approval has been granted by the Coordinating Ethics Committee of the Helsinki and Uusimaa Hospital District. Participation is voluntary and based on written informed consent. Results will be widely disseminated on a national and international level to inform health and welfare policy as well as development of services for asylum seekers. Results of the study will constitute the evidence base for development and implementation of the initial health assessment for asylum seekers on a national level.

1  
2  
3  
4  
5  
6  
7  
8  
9  
10  
11  
12  
13  
14  
15  
16  
17  
18  
19  
20  
21  
22  
23  
24  
25  
26  
27  
28  
29  
30  
31  
32  
33  
34  
35  
36  
37  
38  
39  
40  
41  
42  
43  
44  
45  
46  
47  
48  
49  
50  
51  
52  
53  
54  
55  
56  
57  
58  
59  
60

## Strengths and limitations

- This is the first population-based face-to-face interview and health examination survey producing extensive information on the health and service needs of newly arrived asylum seekers in Finland.
- Total population sampling and inclusion of both adults and children into the survey allows for analysis of family units.
- The prospective study design allows for examining trajectories of health of asylum seekers from the early point of arrival to Finland throughout the course of the asylum process, and if feasible, also after receiving a residence permit in Finland.
- Pragmatic factors restricting the sample size of the study may lead to less precise estimates and requires conduct of analysis using groupings by region, rather than by country of origin.

## 1 Introduction

The peak in asylum applications to Europe between 2015 to 2016 highlighted the need for developing more effective policies for meeting both urgent and long-term healthcare needs of asylum seekers (1,2). An asylum seeker is defined based on their legal status as a person who has applied for international protection and is waiting for a decision on legal asylum, as opposed to a refugee who has already been granted legal asylum (3). Representative population-based information on the health and wellbeing of asylum seekers is needed to guide decision-making and planning of healthcare services for asylum seekers (1). Such information is, however, limited in Europe.

Previous studies have focused mainly on one area of health or wellbeing among asylum seekers, for example on infectious diseases (4-6), mental health (7,8), access to healthcare services (9,10) and human capital (11). Asylum seekers have been reported to be disproportionately burdened by communicable and non-communicable diseases, including a high prevalence of respiratory, gastrointestinal, dermatological and sexually transmitted diseases (5,6,12), poor dental health (5) and physical limitations (10). Prevalence of clinically significant symptoms of depression, anxiety and risk for post-traumatic stress disorder have also been reported to be significantly higher among asylum seekers compared with the general population in receiving countries (7,8). Asylum seekers have also been reported to have a higher prevalence of unmet needs for care, hospital admissions and visits to a psychotherapist but less visits to a general physician compared with the general German population (10).

Previous studies on the health and wellbeing of asylum seekers are generally limited in generalizability to the entire asylum seeker population in the given country due to sample size restrictions and sampling methodology. A further common limitation in previous studies is that asylum seekers and refugees are examined as one group. No previous studies among newly arrived asylum seekers including a nationally representative population-based sample and with standardised objective health examination measures have been identified. In Finland, current information on the health and wellbeing of asylum seekers is limited mainly to infectious disease screening (13) and access to healthcare and social services (14).

1  
2  
3  
4  
5  
6  
7  
8  
9  
10  
11  
12  
13  
14  
15  
16  
17  
18  
19  
20  
21  
22  
23  
24  
25  
26  
27  
28  
29  
30  
31  
32  
33  
34  
35  
36  
37  
38  
39  
40  
41  
42  
43  
44  
45  
46  
47  
48  
49  
50  
51  
52  
53  
54  
55  
56  
57  
58  
59  
60

According to a recent healthcare register-based study, the most common reasons for healthcare visits among asylum seekers in Finland are dental and musculoskeletal problems and mental health symptoms (15). More information is available on the health and wellbeing of persons of refugee origin that have a permanent residence status in Finland. Based on these studies, persons of refugee background have been found to be at a particular disadvantage with respect to a number of health outcomes, including a high incidence of chronic disease risk factors (16), mobility limitations (17) and poor mental health (18).

The main objective of The Asylum Seekers Health and Wellbeing (TERTTU) Survey is to gather systematic and representative interview and health examination data on the health, wellbeing and health service needs of newly arrived asylum seekers in Finland. Participants in the baseline TERTTU Survey will be followed up using register-based data, providing a unique opportunity to examine trajectories of health of asylum seekers from the very early stages of arrival to Finland. The TERTTU Survey data will be used for identification of key indicators for systematic monitoring of asylum seekers health at a national level. The study will also generate data that can be used for designing health promotion measures in reception centres. Correct and timely identification of vulnerable populations and persons in need of services is likely to have significant impact on the immediate and long-term health of asylum seekers (19). Furthermore, it facilitates optimising of existing resources in healthcare provision (20).

## 2 Methods and analysis

The TERTTU Survey is coordinated by the Equality and Inclusion Unit of the National Institute for Health and Welfare, Finland. The study is conducted in collaboration with the Finnish Immigration Service and the reception centres as a part of an EU Asylum, Migration and Integration Fund project aiming at developing evidence-based health examination protocol for newly arrived asylum seekers (21). The Finnish Immigration Service under the Ministry of Interior is responsible for regulation, organisation, steering, supervision and funding of sheltering and health services for asylum seekers, whereas the reception centres are the main providers of health care services (22). Close collaboration with stakeholders provides with a unique opportunity for direct implementation of research findings into practice. Evidence-based development of the health examination protocol will promote equality in the access and quality of services provided for asylum seekers. Stages of the TERTTU Survey are outlined in Table 1.

[Table 1 about here]

A multidisciplinary consortium was formed at the planning stage of the survey consisting of experts from different departments and units of the National Institute for Health and Welfare as well as from other collaborating bodies such as regional authorities, universities, non-governmental organisations and experts working in clinical practice. Conceptual framework of the TERTTU Survey is presented in Figure 1. Asylum seekers may arrive at any life stage and their health and wellbeing are influenced by pre-migration, migration process-related and post migration experiences. Sociodemographic and socioeconomic factors mediate the influence of migration-related factors and other exposures throughout the life course (23). Authorities and institutions regulating the asylum process have a central impact on health outcomes of asylum seekers through defining the rights for services and quality criteria for the services provided to asylum seekers.

[Figure 1 about here]



1  
2  
3 Data collection of the TERTTU Survey is implemented by eight trained multilingual research nurses. In  
4 addition to having a good command of Finnish, languages spoken by research nurses include English,  
5 Arabic, Somali, Persian, Dari, Sorani dialect of Kurdish, Urdu, Russian, Portuguese and French. All of the  
6 study material given to the participants (including information leaflets and consent forms), have been  
7 translated into the most common languages spoken by asylum seekers, which are English, Arabic, Somali,  
8 Persian, Sorani dialect of Kurdish and Russian. Material is translated into additional languages over the  
9 course of the survey if needed. If the study participant speaks another language than the ones spoken by  
10 research nurses, a professional interpreter is used. Professional interpreters are used from accredited  
11 companies and are briefed concerning the importance of standardised protocol.  
12  
13  
14  
15  
16  
17  
18  
19  
20  
21  
22  
23  
24  
25  
26

## 27 **2.1 Study population**

28  
29  
30 The study population includes all newly arrived asylum seekers, who have applied for asylum for the first  
31 time in Finland. Exclusion criteria are persons who: 1) reside in a detention centre; 2) have applied for  
32 asylum in another country and are transferred to Finland based on international agreements (internal  
33 transfer); 3) have been returned to Finland according to the Dublin regulation; 4) have previously had a  
34 residence permit in Finland; 5) children born in Finland. The number of asylum applications varies on a  
35 weekly basis. Participants are recruited into the study approximately two weeks following registration of  
36 their asylum application in Finland. Such sampling frame requires continuous sampling of study participants  
37 compared with retrospective sampling that is generally used in health interview and health examination  
38 surveys. There are approximately 40-60 new asylum applications a week fitting the selection criteria of the  
39 study, which enables inclusion of the total population sample into the study.  
40  
41  
42  
43  
44  
45  
46  
47  
48  
49  
50  
51  
52

53 Both adults and children are invited to participate in the study. This enables to link family members. The  
54 population-based sample is drawn on a weekly basis from an electronic database containing data on all  
55 asylum seekers in Finland and maintained by the Finnish Immigration Services. Each asylum seeker receives  
56 a unique identity number that is used throughout the asylum seeking process. Additional registered  
57  
58  
59  
60

1  
2  
3 information includes date of the asylum application, name, sex, date and country of birth, nationality,  
4  
5 mother tongue and desired language of the interpreter services.  
6  
7  
8  
9

## 10 11 **2.2 Recruitment of study participants** 12

13  
14 Currently (2018), there are altogether 49 reception centres in Finland, out of which 43 are for adults and  
15  
16 families and 6 for unaccompanied minors. The number of reception centres varies depending on the  
17  
18 number of asylum applications and the speed of the decision processes. A substantial majority of adults  
19  
20 and families are initially directed to transit reception centres, where they wait for the asylum interview.  
21  
22 Transit reception centres are located in Helsinki (capital of Finland), Turku, Joutseno and Oulu (Figure 2).  
23  
24 Some newly arrived asylum seekers arrange private housing for themselves. In such case, they are allocated  
25  
26 to the geographically closest reception centre for provision of health and social services throughout the  
27  
28 asylum process. Unaccompanied minors are usually directed to units for minors, where they remain  
29  
30 throughout the entire asylum process. Since participants of the TERTTU Survey are recruited at an early  
31  
32 stage of the asylum process, transit reception centres are the permanent study sites. However since the  
33  
34 TERTTU Survey is based on a total population sample, the survey is conducted in any other national  
35  
36 reception centres depending on where the persons included into the study sample are situated.  
37  
38  
39  
40

41  
42 [Figure 2 about here]  
43  
44

45  
46 Recruitment of study participants in transit reception centres is outlined in Figure 3. Recruitment is the  
47  
48 responsibility of the research nurse. However, reception centre personnel have a central role in facilitating  
49  
50 the initial contact between the research nurse and persons belonging to the study sample. An invitation  
51  
52 with a set time for a reach-out appointment with the research nurse and a brief information leaflet are  
53  
54 delivered to asylum seekers by reception centre personnel. The information leaflet is available in the study  
55  
56 languages and is designed to be understandable even with limited language or literacy skills. [Link to  
57  
58 Supplement Figure 1]  
59  
60

1  
2  
3 [Figure 3 about here]  
4  
5

6 The purpose of the reach-out appointment is that the research nurse makes personal contact with the  
7  
8 persons invited to participate in the study. By providing information on the aims and content of the study,  
9  
10 the research nurse ensures that the person invited to participate has sufficient information to give  
11  
12 informed consent for participation. Booking a reach-out time is the only possibility for personal contact as  
13  
14 no telephone numbers are available for newly-arrived asylum seekers and research nurses do not have  
15  
16 access to the living areas of the reception centres due to security regulations. If the asylum seeker does not  
17  
18 arrive to their reach-out appointment, the research nurse requests the reception centre's social counselors  
19  
20 to see if the person is in their dorm. If the person is on the premises of the reception centre, they are asked  
21  
22 to come to the reception desk and talk with the research nurse. Otherwise, a new reach-out appointment is  
23  
24 booked up to three times, unless the person expresses explicit decline from participation to reception  
25  
26 centre personnel.  
27  
28  
29

30  
31 Asylum seekers living in other reception centres or in private housing are also approached through the  
32  
33 reception centre as no personal contact information is initially available. The research nurse or the project  
34  
35 coordinator contact the reception centre director via e-mail and explain the purpose of the study. Following  
36  
37 this, the research nurse contacts the reception centre for specific arrangements. Telephone contact  
38  
39 information is usually available for persons living in private housing and in such case the research nurse  
40  
41 contacts persons invited to participate directly by telephone. In case of unaccompanied minors, the initial  
42  
43 contact is with the reception centre to enquire for contact details of the legal guardian, who is approached  
44  
45 by e-mail or by telephone by the research coordinator. If the legal guardian gives consent, the  
46  
47 unaccompanied minor is contacted and invited to participate in the study.  
48  
49  
50

51  
52 Two hours are booked in the research nurses schedule for each reach out time, which allows for conduct of  
53  
54 the study straight away if the person agrees to participate. Alternatively, another time is agreed upon. Prior  
55  
56 to starting the interview and the health examination, the research nurse confirms the identity of the  
57  
58 participant by checking their personal identification card. Participants are provided with detailed written  
59  
60

1  
2  
3 information about the study, including the purpose of the study, how the collected information will be  
4 used, data protection, the rights of participants and who is responsible for conduct of the study. If written  
5 information is not available in the language spoken by the asylum seeker or the person is illiterate, the  
6 research nurse goes through written information with assistance of the professional interpreter. The  
7 purpose of the study is explained to minors in an age-appropriate manner.  
8  
9

10  
11  
12  
13  
14  
15 Participants are asked to sign written informed consent. Separate consent is acquired for: 1) the use of the  
16 data for research and development purposes within the National Institute for Health and Welfare; 2)  
17 sharing anonymised data with researchers outside the institute; 3) record linkage of electronic patient  
18 register data to survey data; 4) record linkage of national register data to survey data if asylum is granted in  
19 Finland. Guardians of minors sign informed consent. Additionally, children aged 7 years and older also give  
20 written informed consent. The consent form is designed in age-appropriate manner.  
21  
22  
23  
24  
25  
26  
27  
28  
29  
30  
31

### 32 **2.3 Data collection**

33  
34  
35 The study consists of a standardised face-to-face interview and a health examination. Duration of the study  
36 is approximately 1 hour if conducted in the mother tongue of the participant and approximately 2 hours if  
37 an interpreter is used. Some of the questions concerning mental health as well as sexual and reproductive  
38 health can be completed as self-administered questionnaires during the interview. The research nurse  
39 records whether these were interviewed or self-completed by the participants. Interviews and health  
40 examinations have been tailored for four age groups: 1) adults; 2) 13-17 year-olds; 3) 7-12 year-olds and 4)  
41 0-6 years. Adults and 13-17 year-olds provide their own answers for the interview, whereas the guardians  
42 of 0-12 year-olds answer to the interview questions concerning children. Minors aged 0-12 years  
43 participate only in the health examination. Research nurses received extensive training over the course of  
44 eight days on research methods, purpose and content of the study, interview techniques as well as on  
45 conduct of standardised interview and health examination. Quality control of data collection is also  
46  
47  
48  
49  
50  
51  
52  
53  
54  
55  
56  
57  
58  
59  
60

1  
2  
3 monitored at different stages of data collection following the European Health Examination Survey (EHES)  
4  
5 fieldwork quality control guidelines (24).  
6  
7  
8  
9

### 10 11 **Face-to-face interview** 12

13  
14 The face-to-face interview consists of measures used for assessment of the health, wellbeing, service needs  
15  
16 of asylum seekers as well as for identification of vulnerable populations. Use of simple language was taken  
17  
18 into account. When appropriate, selected measures are comparable with those used in other population-  
19  
20 based surveys conducted among the general population as well as among populations of migrant origin  
21  
22 permanently living in Finland. The content of the interview by age group is outlined in Table 2. The themes  
23  
24 covered in the interview for adults include sociodemographics, asylum seeking journey, literacy, previous  
25  
26 socioeconomic status, health status, sexual and reproductive health, traumatic events, mental health,  
27  
28 health behaviour and social networks. The interview for children under the age of 18 covers similar themes  
29  
30 when relevant. Additionally, early childhood and development are also covered.  
31  
32  
33

34  
35 [Table 2 about here]  
36  
37  
38  
39  
40  
41  
42  
43  
44  
45  
46  
47  
48  
49  
50  
51  
52  
53  
54  
55  
56  
57  
58  
59  
60

### ***Health examination***

Health examination measurements are carried out following EHES protocol (24). The content of the health examination is outlined in Table 3. The health examination of adults and 13-17 year-olds consists of standardised measurements of weight, height, waist circumference, upper arm circumference, blood pressure, and a dental examination. For children belonging to the 7-12 years age group, health examination consists of measurements of weight and height, dental examination and evaluation of condition of the skin. The health examination of children aged 0-6 years consists of evaluation of the condition of the skin and examination for Bacillus Calmette-Guérin (BCG) scar.

[Table 3 about here]

### ***Linkage with register-based data***

Upon separate consent, data collected during the TERTTU Survey can be supplemented with unified national electronic health record (EHR) data of the reception centres on the basis of the unique personal identity number. This allows for following the health of asylum seekers from the initial point of arrival to Finland throughout the entire reception processes. Upon a separate consent, data collected during the TERTTU Survey can be supplemented with data from the national registers on the health, wellbeing and health service use of those who have been granted an asylum (Table 4). Feasibility of this record linkage will be evaluated after a follow-up period. Record linkage with national registers provides with a unique opportunity to examine how the health of asylum seekers evolves throughout their life course.

[Table 4 about here]

### ***Linkage with biological data from the Immunity Against Vaccine Preventable Diseases Study***

Parallel to the TERTTU Survey, a cross-sectional Immunity Against Vaccine Preventable Diseases Study is conducted between 2018 and 2019. The aim of the Immunity Against Vaccine Preventable Diseases Study is to assess previous immunity against measles, mumps, rubella, diphtheria, tetanus and polio among asylum seekers coming from countries with higher incidence of vaccine preventable diseases (25). The study recruits all asylum seekers from Afganistan, Iraq, Russia and Somalia who have not yet received vaccines in Finland, with the aim of gathering a minimum 100 samples per each study group. Blood samples are drawn in connection with the voluntary multiphasic screening for blood-borne and sexually transmitted infections currently offered to all asylum seekers during the initial health assessment. Nurses working in transit centers are responsible for recruitment of study participants. Participants provide written informed consent. Upon a separate consent, results from the Immunity Against Vaccine Preventable Diseases Study can be linked with information on sociodemographics and self-reported history of vaccinations collected during the TERTTU Survey. The Immunity Against Vaccine Preventable Diseases Study is coordinated by the National Institute for Health and Welfare and funded by the National Vaccination Program. The study has been approved by the Coordinating Ethics Committee of the Helsinki and Uusimaa Hospital District (HUS/3330/2017).

#### **2.4 Power and data analysis**

The aim is to gather data on a minimum of 1000 newly arrived asylum seekers. The minimum sample size for the study was calculated manually. Limited project time frame and resources restrict gathering a larger sample. The formula for calculations is enclosed as supplementary material [Link to Supplement Figure 2]. Based on register data on the numbers, country of origin and age of first-time asylum applicants between the years of 2014 and 2016, it is projected that a sample of 1000 participants would constitute of 700 for adults and 100 minors for each of the minor age groups (0-6 years, 7-12 years and 13-17 years). This estimation was calculated assuming simple random sampling. In practice, however, with total population

1  
2  
3 sampling, participation in the study will be influenced by family clusters. Members of the same family are  
4 likely to either all participate in the study or decline from participation. Calculation of estimates assuming  
5 cluster sampling was, however, not possible at the planning stage of the study because the available  
6 register data on asylum applicants from the previous years does not include information on how many  
7 families have arrived, nor on the composition of these families.  
8  
9  
10  
11  
12

13  
14  
15 Using simple random sampling, an estimate of 700 adults would have a confidence interval of roughly  $\pm$   
16 3.5%, and  $\pm$ 5% when examined by sex (n=350). A sample of 100 for each minor age group would result to  
17 confidence intervals of  $\pm$ 10% or less. Thus, projected confidence intervals will produce estimates of  
18 adequate accuracy if simple random sampling was applied (26). Cluster sampling will likely produce wider  
19 confidence intervals than simple random sampling. This issue will be counteracted by using finite  
20 population correction (27), the formula for which is presented in the Supplement Figure 2. After finite  
21 population correction is applied, it is expected that despite cluster sampling, data on a minimum of 1000  
22 persons will nonetheless produce estimates of adequate accuracy. Family clusters will be taken into  
23 account in all of the data analyses following the end of data collection.  
24  
25  
26  
27  
28  
29  
30  
31  
32  
33  
34  
35

36 The main findings of the study will be reported as a report focusing on basic findings as mean and median  
37 values, as well as proportions and their confidence intervals. These will be presented separately for adults,  
38 13-17 year-olds, 7-12 year-olds and 0-6 year-olds, and by regions of origin. The categories for regions of  
39 origin will depend on the final number of participants from different regions. Groupings will be made  
40 according to established regional categories, for example according to the United Nations Statistics Division  
41 groupings (28) or the World Bank regional groupings (29). The effect of non-response will be assessed  
42 based on age, sex and country of origin of all asylum seekers registered in the national electronic asylum  
43 database maintained by the Finnish Immigration Service. Based on these analyses, sample weights will be  
44 calculated, if necessary, to correct for the effect of non-response.  
45  
46  
47  
48  
49  
50  
51  
52  
53  
54  
55

56  
57 Following the publication of the basic report, data will be made available to researchers for in-depth  
58 analyses. Total population sampling allows to examine family units. This provides with a unique opportunity  
59  
60



1  
2  
3 to examine how the health, wellbeing and health service needs of, for example, parents influence those of  
4  
5 their children in later in-depth analyses. These regression analyses will be carried out using a mixed model  
6  
7 that includes family unit as a random effect.  
8  
9

## 10 11 12 13 14 **2.5 Patient and Public Involvement**

15  
16 The study was designed to fill the gap in knowledge on the health, wellbeing and health service use among  
17  
18 asylum seekers. The study was designed consulting a consortium of experts on the topic of the health and  
19  
20 wellbeing of asylum seekers. Persons with asylum seeker background were included into the steering  
21  
22 committee and have provided their insights on the content of the study. No patients were directly involved  
23  
24 in recruitment or conduct of the study. Results of the study benefit participants in that they receive  
25  
26 information on their health and are consulted to seek further medical advice if a need for such is identified  
27  
28 over the course of the study. Results will be disseminated in reception centres and through media and  
29  
30 reports on a national level.  
31  
32  
33  
34  
35  
36  
37  
38  
39

## 40 **3 Ethics and Dissemination**

### 41 42 ***Ethical aspects***

43  
44 Participation in the TERTTU Survey is based on voluntary informed written consent. Participants are  
45  
46 informed concerning personal data protection, sovereignty of the study in terms of the person's asylum  
47  
48 seeking process and confidentiality of the answers. It is made clear that the TERTTU Survey does not  
49  
50 substitute the initial health assessment provided by the reception centres. Furthermore, participants are  
51  
52 informed that they are fully entitled to decline from participation or interrupt participation at any moment  
53  
54 without the need for providing a reason and that they are also entitled to request deletion of their data.  
55  
56  
57  
58  
59  
60

1  
2  
3 Participants are also informed that they are entitled to leave some questions unanswered and that they  
4  
5 may refuse any measurement.  
6  
7

8 All of the data is collected during a one-on-one research appointment. None of the data collected during  
9  
10 the study is shared with a third person (for example spouse, parent of 13-17 year-olds who participate  
11  
12 independently, or reception centre personnel). Research nurses are bound by a confidentiality clause and  
13  
14 have been trained in key principles of research ethics. Professional interpreters provide their services via  
15  
16 the telephone, which provides a higher degree of confidentiality for the participant.  
17  
18

19  
20 Participants are given oral and written feedback on their health examination measures. If a need for further  
21  
22 health care services arises over the course of the survey visit, research nurses recommend participants to  
23  
24 contact the reception centre nurse. All of the TERTTU Survey data is managed following the National  
25  
26 Institute for Health and Welfare's protocol for handling sensitive data. Each study participant is given a  
27  
28 random study ID number and data is handled without personal identification information.  
29  
30

31  
32 Incentives (for example bus cards, toy packages for children) valued at approximately 10 euros are given to  
33  
34 all participants. The TERTTU Survey has been approved by the Coordinating Ethics Committee of the  
35  
36 Helsinki and Uusimaa Hospital District (reference number HUS/3306/2017).  
37  
38  
39  
40  
41  
42

### 43 ***Dissemination of information about the TERTTU Survey***

44  
45  
46 Information about the TERTTU Survey is broadly disseminated both at national and international level at all  
47  
48 stages of the study. Since the TERTTU Survey has been specifically designed to bridge the gap in knowledge  
49  
50 on the health and wellbeing of asylum seekers in Finland, Ministry of Interior, Ministry of Social Welfare  
51  
52 and Health and Ministry of Economic Affairs and Employment are regularly updated on the progress of the  
53  
54 study and these updates are transferred into various country reports compiled by the ministries. The  
55  
56 TERTTU Survey has been presented to a number of international collaborators and at several international  
57  
58 congresses. Possibilities for research collaboration with international partners will be explored.  
59  
60

1  
2  
3 The main findings of the baseline TERTTU Survey will be reported by the end of summer 2019 and they will  
4  
5 be widely disseminated at both national and international level. Following this, TERTTU Survey data will be  
6  
7 available for research purposes upon an accepted study proposal. Evidence-based health examination  
8  
9 protocol will be developed and disseminated across reception centres on a national level by the end of  
10  
11  
12 2019.  
13  
14  
15  
16  
17  
18

## 19 **Acknowledgements**

20  
21  
22 The authors would like to acknowledge experts at the Finnish Immigration Service and all of the personnel  
23  
24 of collaborating reception centres for their substantial efforts in facilitating implementation of the study. All  
25  
26 of the participants in the study, the research nurses involved in baseline data collection, the  
27  
28 multidisciplinary consortium of experts from the National Institute for Health and Welfare and  
29  
30 collaborating bodies as well as the steering committee of the Developing the health examination protocol  
31  
32 for asylum seekers in Finland project also need to be acknowledged. Finally, the authors would like to  
33  
34 acknowledge Sinikka Kytö and Kaaren Erhola for the graphical visualization of the TERTTU Survey material.  
35  
36  
37  
38  
39  
40  
41  
42

## 43 **Author contributions**

44  
45  
46 AC and OS conceptualised the initial idea for the national-level project aiming at developing the health  
47  
48 examination protocol for asylum seekers in Finland within which the TERTTU Survey is implemented. AC  
49  
50 developed the original grant proposal. NS, AC, PK, KL and EL have been involved in planning and  
51  
52 coordination of the study. OS has been the main contact on the behalf of the collaborating partner (Finnish  
53  
54 Immigration Service). PT has been involved in the design and coordination of the Immunity Against Vaccine  
55  
56 Preventable Diseases Study. NS prepared the first draft of the manuscript. All authors (AC, PK, KL, PT, OS,  
57  
58  
59  
60

1  
2  
3 NS) have provided critical feedback and contributed to revision of the manuscript. All authors have read  
4  
5 and approved the final manuscript.  
6  
7

## 8 **Funding** 9

10  
11  
12 TERTTU Survey is implemented as a part of the Developing the health examination protocol for asylum  
13  
14 seekers in Finland: A national development project funded by the EU Asylum, Migration and Integration  
15  
16 Fund.  
17

## 18 19 **Competing interests** 20

21  
22  
23 The authors declare no competing interests.  
24  
25  
26  
27  
28  
29  
30  
31  
32  
33  
34  
35  
36  
37  
38  
39  
40  
41  
42  
43  
44  
45  
46  
47  
48  
49  
50  
51  
52  
53  
54  
55  
56  
57  
58  
59  
60

## References

- 1  
2  
3  
4  
5  
6 (1) Bozorgmehr K, Goosen S, Mohsenpour A, Kuehne A, Razum O, Kunst AE. How Do Countries' Health  
7 Information Systems Perform in Assessing Asylum Seekers' Health Situation? Developing a Health  
8 Information Assessment Tool on Asylum Seekers (HIATUS) and Piloting It in Two European Countries. *Int J*  
9 *Environ Res Public Health* 2017 Aug 8;14(8):10.3390/ijerph14080894.
- 10  
11 (2) Bozorgmehr K, Razum O. Forced Migration and Global Responsibility for Health Comment on "Defining  
12 and Acting on Global Health: The Case of Japan and the Refugee Crisis". *Int J Health Policy Manag* 2016 Nov  
13 5;6(7):415-418.
- 14  
15 (3) European Union. Who qualifies for international protection. Accessed on June 1 2018 from  
16 [https://ec.europa.eu/home-affairs/what-we-do/policies/asylum/refugee-status\\_en](https://ec.europa.eu/home-affairs/what-we-do/policies/asylum/refugee-status_en). 2018.
- 17  
18 (4) Alberer M, Malinowski S, Sanftenberg L, Schelling J. Notifiable infectious diseases in refugees and  
19 asylum seekers: experience from a major reception center in Munich, Germany. *Infection* 2018  
20 Jun;46(3):375-383.
- 21  
22 (5) van Berlaer G, Bohle Carbonell F, Manantsoa S, de Bethune X, Buyl R, Debacker M, et al. A refugee camp  
23 in the centre of Europe: clinical characteristics of asylum seekers arriving in Brussels. *BMJ Open* 2016 Nov  
24 24;6(11):e013963-2016-013963.
- 25  
26 (6) Bloch-Infanger C, Battig V, Kremo J, Widmer AF, Egli A, Bingisser R, et al. Increasing prevalence of  
27 infectious diseases in asylum seekers at a tertiary care hospital in Switzerland. *PLoS One* 2017 Jun  
28 15;12(6):e0179537.
- 29  
30 (7) Leiler A, Bjarta A, Ekdahl J, Wasteson E. Mental health and quality of life among asylum seekers and  
31 refugees living in refugee housing facilities in Sweden. *Soc Psychiatry Psychiatr Epidemiol* 2018 Dec 22.
- 32  
33 (8) Georgiadou E, Morawa E, Erim Y. High Manifestations of Mental Distress in Arabic Asylum Seekers  
34 Accommodated in Collective Centers for Refugees in Germany. *Int J Environ Res Public Health* 2017 Jun  
35 7;14(6):10.3390/ijerph14060612.
- 36  
37 (9) Bozorgmehr K, Schneider C, Joos S. Equity in access to health care among asylum seekers in Germany:  
38 evidence from an exploratory population-based cross-sectional study. *BMC Health Serv Res* 2015 Nov  
39 9;15:502-015-1156-x.
- 40  
41 (10) Schneider C, Joos S, Bozorgmehr K. Disparities in health and access to healthcare between asylum  
42 seekers and residents in Germany: a population-based cross-sectional feasibility study. *BMJ Open* 2015 Nov  
43 4;5(11):e008784-2015-008784.
- 44  
45 (11) Buber-Ennser I, Kohlenberger J, Rengs B, Al Zalak Z, Goujon A, Striessnig E, et al. Human Capital,  
46 Values, and Attitudes of Persons Seeking Refuge in Austria in 2015. *PLoS One* 2016 Sep 23;11(9):e0163481.
- 47  
48 (12) Pavli A, Maltezou H. Health problems of newly arrived migrants and refugees in Europe. *J Travel Med*  
49 2017 Jul 1;24(4):10.1093/jtm/tax016.
- 50  
51 (13) Tiittala P, Tuomisto K, Puumalainen T, Lyytikainen O, Ollgren J, Snellman O, et al. Public health  
52 response to large influx of asylum seekers: implementation and timing of infectious disease screening. *BMC*  
53 *Public Health* 2018 Sep 24;18(1):1139-018-6038-9.
- 54  
55  
56  
57  
58  
59  
60

- 1  
2  
3 (14) Tiittala P SE. Asylum seekers' access to mental health and dental health services, and prevention of  
4 infection disease problems in Finland in 2017. Research brief 10 National Institute for Health and Welfare,  
5 Helsinki, Finland 2018.  
6  
7 (15) Tiittala P, Räisänen P, Lilja E, Castaneda A, Snellman O, Helve O, et al. Healthcare service use and health  
8 concerns among asylum seekers in Finland in 2015–2016. Data brief 29, National Institute for Health and  
9 Welfare, Helsinki, Finland. Accessed on January 19, 2019 from <http://urn.fi/URN:ISBN:978-952-343-187-4>.  
10 2018.  
11  
12 (16) Skogberg N, Laatikainen T, Jula A, Harkanen T, Vartiainen E, Koponen P. Contribution of  
13 sociodemographic and lifestyle-related factors to the differences in metabolic syndrome among Russian,  
14 Somali and Kurdish migrants compared with Finns. *Int J Cardiol* 2017 Apr 1;232:63-69.  
15  
16 (17) Rask S, Sainio P, Castaneda AE, Harkanen T, Stenholm S, Koponen P, et al. The ethnic gap in mobility: a  
17 comparison of Russian, Somali and Kurdish origin migrants and the general Finnish population. *BMC Public*  
18 *Health* 2016 Apr 18;16:340-016-2993-1.  
19  
20 (18) Rask S, Suvisaari J, Koskinen S, Koponen P, Molsa M, Lehtisalo R, et al. The ethnic gap in mental health:  
21 A population-based study of Russian, Somali and Kurdish origin migrants in Finland. *Scand J Public Health*  
22 2016 May;44(3):281-290.  
23  
24 (19) Bozorgmehr K, Razum O. Effect of Restricting Access to Health Care on Health Expenditures among  
25 Asylum-Seekers and Refugees: A Quasi-Experimental Study in Germany, 1994-2013. *PLoS One* 2015 Jul  
26 22;10(7):e0131483.  
27  
28 (20) Bozorgmehr K, Wenner J, Razum O. Restricted access to health care for asylum-seekers: applying a  
29 human rights lens to the argument of resource constraints. *Eur J Public Health* 2017 Aug 1;27(4):592-593.  
30  
31 (21) National Institute for Health and Welfare. Developing the health examination protocol for asylum  
32 seekers in Finland: A national development project (TERTTU). Accessed November 1, 2018 from  
33 [https://thl.fi/en/web/thlfi-en/research-and-expertwork/projects-and-programmes/developing-the-health-](https://thl.fi/en/web/thlfi-en/research-and-expertwork/projects-and-programmes/developing-the-health-examination-protocol-for-asylum-seekers-in-finland-a-national-development-project-terttu)  
34 [examination-protocol-for-asylum-seekers-in-finland-a-national-development-project-terttu](https://thl.fi/en/web/thlfi-en/research-and-expertwork/projects-and-programmes/developing-the-health-examination-protocol-for-asylum-seekers-in-finland-a-national-development-project-terttu). 2018.  
35  
36 (22) Helve O, Tuomisto K, Tiittala P, Puumalainen T. Asylum seekers' health care in Finland in 2015–2016.  
37 Report on a survey of reception centres. Helsinki, Finland 2016. ISBN 978-952-302-774-9 (printed); ISBN  
38 978-952-302-775-6 (pdf). Accessed on January 15, 2019 from: [http://urn.fi/URN:ISBN:978-952-](http://urn.fi/URN:ISBN:978-952-302-775-6)  
39 [302-775-6](http://urn.fi/URN:ISBN:978-952-302-775-6). National Institute for Health and Welfare 2016;19.  
40  
41 (23) Abubakar I, Aldridge RW, Devakumar D, Orcutt M, Burns R, Barreto ML, et al. The UCL-Lancet  
42 Commission on Migration and Health: the health of a world on the move. *Lancet* 2018 Dec  
43 15;392(10164):2606-2654.  
44  
45 (24) Tolonen H. Part B, Fieldwork Procedures. *Directions* 2016\_14. Accessed on July 1, 2018 from:  
46 <http://urn.fi/URN:ISBN:978-952-302-701-5>. 2016.  
47  
48 (25) Mipatrini D, Stefanelli P, Severoni S, Rezza G. Vaccinations in migrants and refugees: a challenge for  
49 European health systems. A systematic review of current scientific evidence. *Pathog Glob Health*  
50 2017;111(2):59-68.  
51  
52  
53  
54  
55  
56  
57  
58  
59  
60

1  
2  
3  
4  
5  
6  
7  
8  
9  
10  
11  
12  
13  
14  
15  
16  
17  
18  
19  
20  
21  
22  
23  
24  
25  
26  
27  
28  
29  
30  
31  
32  
33  
34  
35  
36  
37  
38  
39  
40  
41  
42  
43  
44  
45  
46  
47  
48  
49  
50  
51  
52  
53  
54  
55  
56  
57  
58  
59  
60

- (26) Lwanga SK, Lemeshow S. Sample size determination in health studies : a practical manual. Geneva: World Health Organization. Accessed on July 1, 2018 from: <http://www.who.int/iris/handle/10665/40062>. 1991.
- (27) Lehtinen R PE. Practical Methods for Design and Analysis of Complex Surveys. Second Edition. ed. Published Online: 10 FEB 2004, DOI: 10.1002/0470091649: John Wiley & Sons, Ltd; 2004.
- (28) United Nations Statistics Division. Methodology: Standard country or area codes for statistical use. Accessed on January 23, 2019 from: <https://unstats.un.org/unsd/methodology/m49/>. 2019.
- (29) The World Bank. Data: World Bank Country and Lending Groups. Accessed on January 23, 2019 from: <https://datahelpdesk.worldbank.org/knowledgebase/articles/906519-world-bank-country-and-lending-groups>. 2019.
- (30) UNESCO Institute of Statistics. International Standard Classification of Education ISCED 2011. 2012; Accessed on October 20, 2018 from: <http://uis.unesco.org/sites/default/files/documents/international-standard-classification-of-education-isced-2011-en.pdf>. 2018.
- (31) Eurostat. European Health Interview Survey (EHIS Wave 3). Methodological manual. Luxembourg, Publications office of the European Union. <https://ec.europa.eu/eurostat/documents/3859598/8762193/KS-02-18-240-EN-N.pdf/5fa53ed4-4367-41c4-b3f5-260ced9ff2f6>. 2018.
- (32) Pynoos R, Rodriguez N, Steinberg A, Stuber M, & Frederick C. UCLA PTSD Index for DSM-IV. Accessed on July 1, 2018 from <https://www.mc.vanderbilt.edu/coe/tfcbt/workbook/Assessment/UCLA%20PTSD%20Index-%20Parent.pdf>. 1998.
- (33) Loeb M, Cappa C, Cialesi R, de Palma E. Measuring child functioning: the Unicef/ Washington Group Module. Salud Publica Mex 2017 Jul-Aug;59(4):485-487.
- (34) Mollica RF, Caspi-Yavin Y, Bollini P, Truong T, Tor S, Lavelle J. The Harvard Trauma Questionnaire. Validating a cross-cultural instrument for measuring torture, trauma, and posttraumatic stress disorder in Indochinese refugees. J Nerv Ment Dis 1992 Feb;180(2):111-116.
- (35) Derogatis LR, Lipman RS, Rickels K, Uhlenhuth EH, Covi L. The Hopkins Symptom Checklist (HSCL): a self-report symptom inventory. Behav Sci 1974 Jan;19(1):1-15.
- (36) Dimitrova M, Gologanova K, Friele B, Rueffer J., Kroo A, Szilvia K, et al. PROTECT - Process of recognition and Orientation of Torture Victims in European Countries to Facilitate Care and Treatment. Accessed on July 1, 2018 <http://protect-able.eu/wp-content/uploads/2013/01/protect-global-eng.pdf>.
- (37) Bush K, Kivlahan DR, McDonnell MB, Fihn SD, Bradley KA. The AUDIT alcohol consumption questions (AUDIT-C): an effective brief screening test for problem drinking. Ambulatory Care Quality Improvement Project (ACQUIP). Alcohol Use Disorders Identification Test. Arch Intern Med 1998 Sep 14;158(16):1789-1795.
- (38) ESPAD. Questionnaire of Substance Use. The European School Survey Project on Alcohol and Other Drugs. Accessed on July 1, 2018 from [http://www.espad.org/sites/espad.org/files/ESPAD\\_Questionnaire\\_2011.pdf](http://www.espad.org/sites/espad.org/files/ESPAD_Questionnaire_2011.pdf). 2011.

**Table 1 Stages of the TERTTU Survey**

| <b>Baseline data collection</b>                            |                                                                                                                                                                                       |
|------------------------------------------------------------|---------------------------------------------------------------------------------------------------------------------------------------------------------------------------------------|
| 3-10/2017                                                  | Planning the data collection of the baseline TERTTU Survey.                                                                                                                           |
| 9/2017-1/2018                                              | Receiving Coordinating Ethics Committee of the Helsinki and Uusimaa Hospital District permission for implementing baseline and follow-up studies.                                     |
| 11/2017                                                    | Piloting the TERTTU Survey among volunteers with asylum seeker background.                                                                                                            |
| 12/2017-1/2018                                             | Recruitment of the research nurses.                                                                                                                                                   |
| 2/2018                                                     | Training of the research nurses.                                                                                                                                                      |
| 3/2018-12/2018                                             | Baseline data collection.                                                                                                                                                             |
| 2/2019-4/2019                                              | Data management, data quality assessment and analysis.                                                                                                                                |
| 5-6/2019                                                   | Reporting basic findings.                                                                                                                                                             |
| 7/2019 -                                                   | Data available for research purposes to other researchers upon an accepted study proposal by the National Institute for Health and Welfare.                                           |
| 7-12/2019                                                  | Dissemination of the main findings of the baseline TERTTU Survey and use for evidence-based development of the national health examination protocol for newly arrived asylum seekers. |
| <b>1. Follow-up of TERTTU Survey participants</b>          |                                                                                                                                                                                       |
| 2020 onwards                                               | Linkage of reception centre electronic health records to baseline TERTTU Survey data based on unique asylum process identification number.                                            |
| <b>2. Follow-up of baseline TERTTU Survey participants</b> |                                                                                                                                                                                       |
| 2020 onwards                                               | Feasibility of linking national register data to baseline TERTTU Survey data among persons granted asylum will be evaluated.                                                          |



**Table 2 Content of the interview of the Asylum Seekers Health and Wellbeing Survey (TERTTU)**

| Themes                          | Variable/measure                                                             | Questionnaire instrument/measures                                                                                                                                                                    | Age group                 |
|---------------------------------|------------------------------------------------------------------------------|------------------------------------------------------------------------------------------------------------------------------------------------------------------------------------------------------|---------------------------|
| Sociodemographics               | Age, sex, year of birth, mother tongue, prior country of permanent residence | -                                                                                                                                                                                                    | Adults<br>0-17 year-olds  |
| Asylum seeking journey          | Year when left permanent residence, route to Finland                         | Countries, types of housing and duration of stay in these locations during the asylum journey                                                                                                        | Adults<br>0-17 year-olds  |
| Literacy                        | Language skills, reading and writing skills                                  | Mastery of languages other than mother tongue, ability to read and write (7+ year-olds)                                                                                                              | Adults<br>0-17 year-olds  |
| Previous socioeconomic status   | Education, occupation                                                        | International Standard Classification of Education (ISCED-2011) (30), prior occupation                                                                                                               | Adults                    |
| Health status                   | Self-rated health, presence of long-term conditions                          | Minimum European Health Module (MEHM) (31)                                                                                                                                                           | Adults<br>0-17 year-olds  |
|                                 | Chronic and infectious diseases, medications, current physical symptoms      | Various health conditions diagnosed by a physician, need for regular medication, current medication, various somatic symptoms, tuberculosis symptoms, prior infectious diseases, vaccination history | Adults<br>0-17 year-olds  |
|                                 | Functional capacity                                                          | adapted from Washington Group Module (32)<br>adapted from Unicef/ Washington Group Module (33)                                                                                                       | Adults<br>0-17 year-olds  |
| Early childhood and development | Gestation, early life development                                            | Gestation week at birth, complications during birth, birth weight, height, early life development milestones                                                                                         | 0-12 year-olds            |
|                                 | Growth and development                                                       | Previously identified problems in growth and development                                                                                                                                             | 0-17 year-olds            |
| Sexual and reproductive health  | Sexual behaviour                                                             | Questions related to risk behavior predisposing to sexually transmitted diseases                                                                                                                     | Adults<br>13-17 year-olds |
|                                 | Male circumcision/female genital mutilation                                  | Age of circumcision (if circumcised), problems associated with female genital mutilation                                                                                                             | Adults<br>0-17 year-olds  |
|                                 | Pregnancies and births                                                       | Number of pregnancies, miscarriages, abortions, parity                                                                                                                                               | Adults<br>13-17 year-olds |
| Traumatic events                | Physical trauma due to accident/violence                                     | Types of injuries before/during asylum journey                                                                                                                                                       | Adults                    |
|                                 | Potentially traumatic life events                                            | Various traumatic life events, adapted from Harvard Trauma Questionnaire (34)<br>Potentially traumatic events, adapted from UCLA PTSD INDEX FOR DSM-IV (32)                                          | Adults<br>0-17 year-olds  |

|                 |                                         |                                                                                 |                           |
|-----------------|-----------------------------------------|---------------------------------------------------------------------------------|---------------------------|
| Mental health   | Mental health symptoms                  | HSCL-25 (35,36), PROTECT-able SDQ                                               | Adults<br>2-17 year-olds  |
| Health behavior | Smoking                                 | Frequency of smoking, use of different types of tobacco products                | Adults<br>13-17 year-olds |
|                 | Alcohol use                             | Alcohol use, AUDIT-C (37)<br>Alcohol use, adapted from ESPAD questionnaire (38) | Adults<br>13-17 year-olds |
|                 | Drugs                                   | Use of intravenous and other drugs                                              | Adults<br>13-17 year-olds |
|                 | Diet                                    | Intake of selected food items                                                   | Adults<br>0-17 year-olds  |
|                 | Dental health                           | Frequency of brushing teeth, latest visit to a dentist                          | Adults<br>0-17 year-olds  |
| Social networks | Family members, contact with close ones | Whereabouts of close family members, being able to be in touch with close ones  | Adults<br>0-17 year-olds  |

PROTECT, Process of recognition and Orientation of Torture Victims in European Countries to Facilitate Care and Treatment; AUDIT-C, AUDIT Alcohol Consumption Questionnaire; ESPAD, The European School Survey Project on Alcohol and Other Drugs.

**Table 3 Content of the health examination of the Asylum Seekers Health and Wellbeing Survey (TERTTU)**

| Variable                | Measurement tool                           | Measurement method                                                                                                                                                               | Age group                 |
|-------------------------|--------------------------------------------|----------------------------------------------------------------------------------------------------------------------------------------------------------------------------------|---------------------------|
| Weight                  | Seca 877                                   | Measured wearing no shoes and only light clothing, with no heavy objects in the pockets. If the participant is pregnant, self-reported weight before pregnancy is recorded. (24) | Adults<br>7-17 year-olds  |
| Height                  | Stand-alone stadiometer, Seca 217          | Measured wearing no shoes and standing upright, looking straight ahead. (24)                                                                                                     | Adults<br>7-17 year-olds  |
| Waist circumference     | Soft measuring tape, Hoehstmast            | Measurement taken on bare skin on top of light clothing, half-way between the lowest rib and the top of iliac crest. (24)                                                        | Adults<br>13-17 year-olds |
| Upper arm circumference | Soft measuring tape, Hoehstmast            | Measurement taken on bare skin, with the elbow resting comfortably on the surface of the table at a 90 degree angle.                                                             | Adults<br>13-17 year-olds |
| Blood pressure          | Omron i-C10 digital blood pressure monitor | Measurement taken three times with a one minute interval on bare skin. (24)                                                                                                      | Adults<br>13-17 year-olds |
| Pulse                   | Manually, with a stopwatch                 | Each pulse beat is counted for 60 seconds. (24)                                                                                                                                  | Adults<br>13-17 year-olds |
| Dental examination      | -                                          | Existence of removable teeth prosthesis, number of teeth (without removable teeth prosthesis), standardised evaluation of dental health                                          | Adults<br>7-17 year-olds  |
| Skin condition          | -                                          | Standardised evaluation of skin condition (identification of bruises and rash)                                                                                                   | 0-12 year-olds            |
| BCG scar                | -                                          | Standardised evaluation of the presence of Bacillus Calmette-Guérin (BCG) scar                                                                                                   | 0-6 year-olds             |

**Table 4 Potential register linkages in the TERTTU Survey**

| <b>National register</b>                  | <b>Type of information</b>                                                            |
|-------------------------------------------|---------------------------------------------------------------------------------------|
| Population Register Centre                | Place of residence, marital status, nationality                                       |
| Ministry of Employment and the Economy    | Use of employment services, participation in activities for promoting employment      |
| Social Insurance Institution of Finland   | Social benefits and reimbursements for medical costs                                  |
| National Institute for Health and Welfare | Number and reasons for healthcare visits and hospital care, procedures and treatments |
| Statistics Finland                        | Socio-economic position, education and causes of death                                |

1  
2 **Figure legends**  
3  
4  
5

6 **Figure 1 Conceptual framework of the TERTTU Survey** (Figure 1 preferably reproduced in colour)  
7

8 **Figure 2 Permanent study locations in transit reception centres**  
9

10 **Figure 3 Flow chart of the baseline TERTTU Survey**  
11

12  
13  
14  
15 **Supplement Figure 1 Brief information pamphlet given in connection with booking a time for a reach-out appointment**  
16

17 (Supplement Figure 1 preferably reproduced in colour)  
18

19 **Supplement Figure 2 Formula for calculating the sample size of the TERTTU Survey**  
20  
21  
22  
23  
24  
25  
26  
27  
28  
29  
30  
31  
32  
33  
34  
35  
36  
37  
38  
39  
40  
41  
42  
43  
44  
45  
46

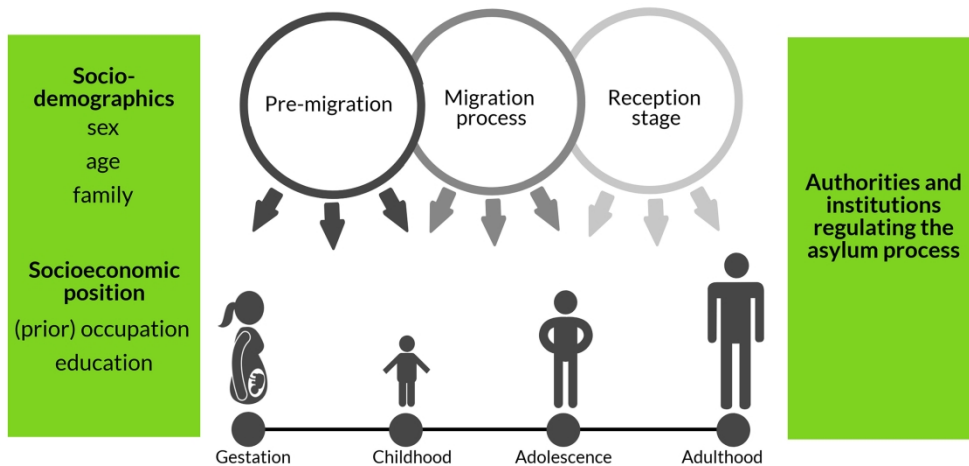

Figure 1 Conceptual framework of the TERTTU Survey

297x145mm (300 x 300 DPI)

1  
2  
3  
4  
5  
6  
7  
8  
9  
10  
11  
12  
13  
14  
15  
16  
17  
18  
19  
20  
21  
22  
23  
24  
25  
26  
27  
28  
29  
30  
31  
32  
33  
34  
35  
36  
37  
38  
39  
40  
41  
42  
43  
44  
45  
46  
47  
48  
49  
50  
51  
52  
53  
54  
55  
56  
57  
58  
59  
60

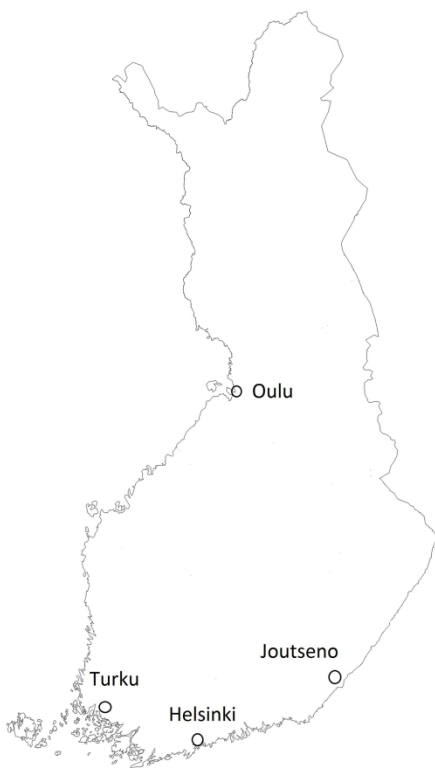

Figure 2 Permanent study locations in transit reception centres  
212x299mm (300 x 300 DPI)





1  
2  
3  
4  
5  
6  
7  
8  
9  
10  
11  
12  
13  
14  
15  
16  
17  
18  
19  
20  
21  
22  
23  
24  
25  
26  
27  
28  
29  
30  
31  
32  
33  
34  
35  
36  
37  
38  
39  
40  
41  
42  
43  
44  
45  
46  
47  
48  
49  
50  
51

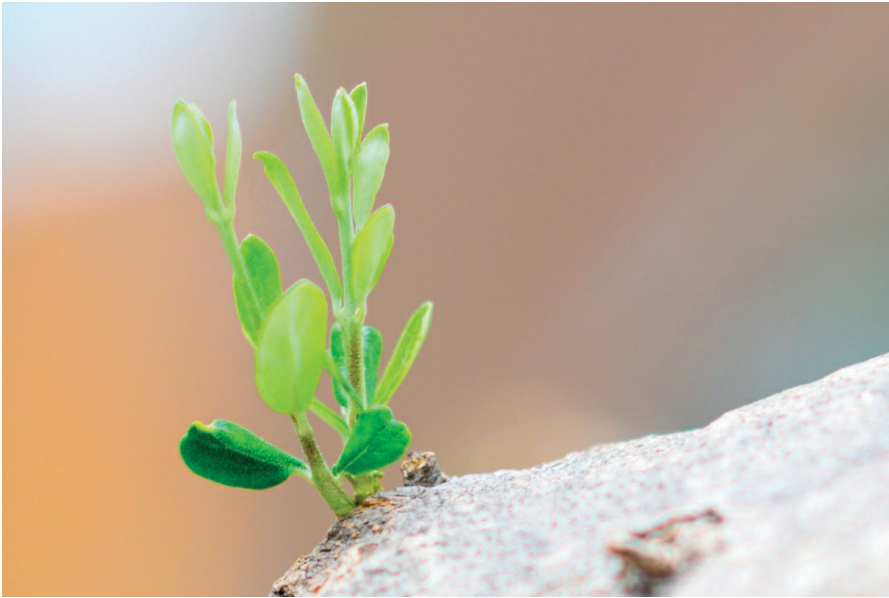

TERTTU promotes the health and wellbeing of asylum seekers through:

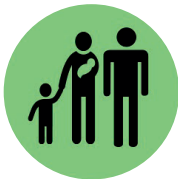

Gathering representative information on the health of newly arrived asylum seekers

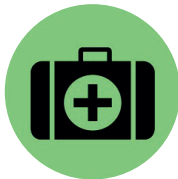

Developing the current health examination protocol

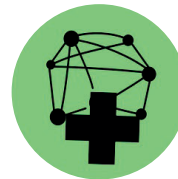

Developing unified practices across reception centers

*Unified practices and evaluation tools.  
Right kind of help at the right time.*

1  
2  
3  
4  
5  
6  
7  
8  
9  
10  
11  
12  
13  
14  
15  
16  
17  
18  
19  
20  
21  
22  
23  
24  
25  
26  
27  
28  
29  
30  
31  
32  
33  
34  
35  
36  
37  
38  
39  
40  
41  
42  
43  
44  
45  
46  
47  
48  
49  
50  
51

# TERTTU

Developing the health examination protocol for newly arrived asylum seekers

## Stages of the project

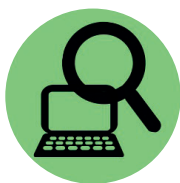

2017  
Overview of current practices, electronic health record analysis



2018  
Conducting a Health and Wellbeing Survey in reception centres



2019  
Developing the health examination protocol

For more information: [www.thl.fi/terttu-project](http://www.thl.fi/terttu-project)

## In co-operation

National Institute for Health and Welfare (THL) • Finnish Immigration Service

Supported by The European Union, the Asylum, Migration and Integration Fund (Amif)



### CONTACT US

**Natalia Skogberg**  
Project Manager, THL  
[natalia.skogberg@thl.fi](mailto:natalia.skogberg@thl.fi)

**Katri-Leena Mustonen**  
Project Coordinator, THL  
[katri-leena.mustonen@thl.fi](mailto:katri-leena.mustonen@thl.fi)

### Notation

|                  |                                                                   |
|------------------|-------------------------------------------------------------------|
| $N$              | total population size                                             |
| $n$              | sample size                                                       |
| $z_{1-\alpha/2}$ | level of confidence according to the standard normal distribution |
| $P$              | estimated proportion of the population                            |
| $d$              | margin of error                                                   |

Assuming a simple random sample, the estimated population proportion with a specified absolute precision is

$$n = z_{1-\alpha/2}^2 P(1 - P) / d_{srs}^2 \quad (\text{Lwanga and Lemeshow 1991, p. 25}).$$

This is equivalent with

$$d_{srs} = z_{1-\alpha/2} \sqrt{\frac{P(1 - P)}{n}}.$$

For a 95 % confidence level  $z_{1-\alpha/2} \approx 1.96$  and for an unknown estimated proportion we use  $P = 0.5$  where the term  $P(1 - P)$  reaches its maximum value. Thus, we get

$$d = 1.96 \sqrt{\frac{0.5(1 - 0.5)}{n}} = \frac{0.98}{\sqrt{n}}.$$

### Example

If  $n = 100$  then  $d_{srs} = 0.98 / \sqrt{100} = 0.098$ .

A sample size of 100 would have a 95 % confidence interval of  $\pm 9.8$  % or less.

## Margin of error in survey data

A sample that includes complex survey design such as different sampling probabilities or cluster sampling, should account for the design effect. The design effect

$$DEFF = var(survey)/var(srs),$$

where  $var(survey)$  is the variation based on the survey design and  $var(srs)$  is the variance assuming a simple random sampling.

If the sample includes a significant amount of the total population, a finite population correction can be applied. The formula for the correction is

$$FPC = \sqrt{\frac{N-n}{N-1}}.$$

A margin of error that accounts for design effect and finite population correction is

$$d_{survey} = z_{1-\alpha/2} \sqrt{\frac{P(1-P)}{n}} \times DEFF \times FPC$$

(Lehtonen and Pahkinen 2004).

# BMJ Open

**The Asylum Seekers Health and Wellbeing (TERTTU) Survey: study protocol for a prospective total population health examination survey on the health and service needs of newly arrived asylum seekers in Finland**

|                                 |                                                                                                                                                                                                                                                                                                                                                                                                                                                                                                                  |
|---------------------------------|------------------------------------------------------------------------------------------------------------------------------------------------------------------------------------------------------------------------------------------------------------------------------------------------------------------------------------------------------------------------------------------------------------------------------------------------------------------------------------------------------------------|
| Journal:                        | <i>BMJ Open</i>                                                                                                                                                                                                                                                                                                                                                                                                                                                                                                  |
| Manuscript ID                   | bmjopen-2018-027917.R3                                                                                                                                                                                                                                                                                                                                                                                                                                                                                           |
| Article Type:                   | Protocol                                                                                                                                                                                                                                                                                                                                                                                                                                                                                                         |
| Date Submitted by the Author:   | 27-Feb-2019                                                                                                                                                                                                                                                                                                                                                                                                                                                                                                      |
| Complete List of Authors:       | Skogberg, N. ; National Institute for Health and Welfare, Helsinki, Finland, Welfare<br>Koponen, Päivikki; National Institute for Health and Welfare, Public Health Solutions<br>Tiittala, Paula; National Institute for Health and Welfare<br>Mustonen, Katri-Leena; National Institute for Health and Welfare, Welfare<br>Lilja, Eero; National Institute for Health and Welfare, Welfare<br>Snellman, Olli; Finnish Immigration Service<br>Castaneda, Anu; National Institute for Health and Welfare, Welfare |
| <b>Primary Subject Heading</b>: | Epidemiology                                                                                                                                                                                                                                                                                                                                                                                                                                                                                                     |
| Secondary Subject Heading:      | Global health, Health services research, Health policy                                                                                                                                                                                                                                                                                                                                                                                                                                                           |
| Keywords:                       | Organisation of health services < HEALTH SERVICES ADMINISTRATION & MANAGEMENT, EPIDEMIOLOGY, Protocols & guidelines < HEALTH SERVICES ADMINISTRATION & MANAGEMENT, asylum seeker and refugee health, Health policy < HEALTH SERVICES ADMINISTRATION & MANAGEMENT                                                                                                                                                                                                                                                 |
|                                 |                                                                                                                                                                                                                                                                                                                                                                                                                                                                                                                  |

SCHOLARONE™  
Manuscripts

1  
2  
3 The Asylum Seekers Health and Wellbeing (TERTTU) Survey: study protocol for a prospective total  
4 population health examination survey on the health and service needs of newly arrived asylum seekers in  
5  
6  
7 Finland  
8  
9

10 Natalia Skogberg<sup>a\*</sup>, Päivikki Koponen<sup>b</sup>, Paula Tiittala<sup>c</sup>, Katri-Leena Mustonen<sup>a</sup>, Eero Lilja<sup>a</sup>, Olli Snellman<sup>d</sup>, Anu  
11  
12 Castaneda<sup>a</sup>.

13  
14  
15  
16 [the surname of each author is underlined]  
17

18  
19  
20  
21 <sup>a</sup>Department of Welfare, National Institute for Health and Welfare, Helsinki, Finland.  
22

23 <sup>b</sup>Department of Public Health Solutions, National Institute for Health and Welfare, Helsinki, Finland;  
24

25 <sup>c</sup>Department of Health Security, National Institute for Health and Welfare, Helsinki, Finland;  
26

27 <sup>d</sup>Finnish Immigration Service, Helsinki, Finland.  
28  
29  
30  
31

32 \*Corresponding author: Natalia Skogberg, Department of Welfare, National Institute for Health and  
33  
34 Welfare; Mannerheimintie 166, PL 30, 00271 Helsinki, Finland; e-mail: natalia.skogberg@thl.fi; telephone:  
35  
36 +358295247916; fax: +358295246111.  
37  
38

39  
40 Keywords: organization of health services, health policy, protocols and guidelines, epidemiology, asylum  
41  
42 seeker and refugee health  
43  
44  
45  
46  
47

48 Word count abstract: 255 words  
49

50  
51 Word count main text: 4120 words  
52  
53  
54  
55  
56  
57  
58  
59  
60

## Abstract

### Introduction

Health, wellbeing and health service needs of asylum seekers have emerged as urgent topics following the arrival of 2.5 million asylum seekers to EU between 2015 and 2016. However, representative information on the health, wellbeing and service needs of asylum seekers is scarce. The aim of the Asylum Seekers Health and Wellbeing (TERTTU) Survey is to 1) gather population-based representative information; 2) identify key indicators for systematic monitoring; 3) produce the evidence-base for development of systematic screening of asylum seekers' health, wellbeing and health service needs.

### Methods and analysis

TERTTU Survey is a population-based prospective study with a total population sample of newly arrived asylum seekers to Finland, including adults and children. Baseline data collection is carried out in reception centres in 2018 and consists of a face-to-face interview, self-administered questionnaire and a health examination following a standardised protocol. Altogether 1000 asylum seekers will be included into the study. Baseline data will be followed up with national electronic health record data encompassing the entire asylum process and later with national register data among persons who are receive residency permits.

### Ethics and dissemination

Ethical approval has been granted by the Coordinating Ethics Committee of the Helsinki and Uusimaa Hospital District. Participation is voluntary and based on written informed consent. Results will be widely disseminated on a national and international level to inform health and welfare policy as well as development of services for asylum seekers. Results of the study will constitute the evidence base for development and implementation of the initial health assessment for asylum seekers on a national level.

1  
2  
3  
4  
5  
6  
7  
8  
9  
10  
11  
12  
13  
14  
15  
16  
17  
18  
19  
20  
21  
22  
23  
24  
25  
26  
27  
28  
29  
30  
31  
32  
33  
34  
35  
36  
37  
38  
39  
40  
41  
42  
43  
44  
45  
46  
47  
48  
49  
50  
51  
52  
53  
54  
55  
56  
57  
58  
59  
60

## Strengths and limitations

- This is the first population-based face-to-face interview and health examination survey producing extensive information on the health and service needs of newly arrived asylum seekers in Finland.
- Total population sampling and inclusion of both adults and children into the survey allows for analysis of family units.
- The prospective study design allows for examining trajectories of health of asylum seekers from the early point of arrival to Finland throughout the course of the asylum process, and if feasible, also after receiving a residence permit in Finland.
- Pragmatic factors restricting the sample size of the study may lead to less precise estimates and requires conduct of analysis using groupings by region, rather than by country of origin.



## 1 Introduction

The peak in asylum applications to Europe between 2015 to 2016 highlighted the need for developing more effective policies for meeting both urgent and long-term healthcare needs of asylum seekers (1,2). An asylum seeker is defined based on their legal status as a person who has applied for international protection and is waiting for a decision on legal asylum, as opposed to a refugee who has already been granted legal asylum (3). Representative population-based information on the health and wellbeing of asylum seekers is needed to guide decision-making and planning of healthcare services for asylum seekers (1). Such information is, however, limited in Europe.

Previous studies have focused mainly on one area of health or wellbeing among asylum seekers, for example on infectious diseases (4-6), mental health (7,8), access to healthcare services (9,10) and human capital (11). Asylum seekers have been reported to be disproportionately burdened by communicable and non-communicable diseases, including a high prevalence of respiratory, gastrointestinal, dermatological and sexually transmitted diseases (5,6,12), poor dental health (5) and physical limitations (10). Prevalence of clinically significant symptoms of depression, anxiety and risk for post-traumatic stress disorder have also been reported to be significantly higher among asylum seekers compared with the general population in receiving countries (7,8). Asylum seekers have also been reported to have a higher prevalence of unmet needs for care, hospital admissions and visits to a psychotherapist but less visits to a general physician compared with the general German population (10).

Previous studies on the health and wellbeing of asylum seekers are generally limited in generalizability to the entire asylum seeker population in the given country due to sample size restrictions and sampling methodology. A further common limitation in previous studies is that asylum seekers and refugees are examined as one group. No previous studies among newly arrived asylum seekers including a nationally representative population-based sample and with standardised objective health examination measures have been identified. In Finland, current information on the health and wellbeing of asylum seekers is limited mainly to infectious disease screening (13) and access to healthcare and social services (14).

1  
2  
3  
4  
5  
6  
7  
8  
9  
10  
11  
12  
13  
14  
15  
16  
17  
18  
19  
20  
21  
22  
23  
24  
25  
26  
27  
28  
29  
30  
31  
32  
33  
34  
35  
36  
37  
38  
39  
40  
41  
42  
43  
44  
45  
46  
47  
48  
49  
50  
51  
52  
53  
54  
55  
56  
57  
58  
59  
60

According to a recent healthcare register-based study, the most common reasons for healthcare visits among asylum seekers in Finland are dental and musculoskeletal problems and mental health symptoms (15). More information is available on the health and wellbeing of persons of refugee origin that have a permanent residence status in Finland. Based on these studies, persons of refugee background have been found to be at a particular disadvantage with respect to a number of health outcomes, including a high incidence of chronic disease risk factors (16), mobility limitations (17) and poor mental health (18).

The main objective of The Asylum Seekers Health and Wellbeing (TERTTU) Survey is to gather systematic and representative interview and health examination data on the health, wellbeing and health service needs of newly arrived asylum seekers in Finland. Participants in the baseline TERTTU Survey will be followed up using register-based data, providing a unique opportunity to examine trajectories of health of asylum seekers from the very early stages of arrival to Finland. The TERTTU Survey data will be used for identification of key indicators for systematic monitoring of asylum seekers health at a national level. The study will also generate data that can be used for designing health promotion measures in reception centres. Correct and timely identification of vulnerable populations and persons in need of services is likely to have significant impact on the immediate and long-term health of asylum seekers (19). Furthermore, it facilitates optimising of existing resources in healthcare provision (20).

## 2 Methods and analysis

The TERTTU Survey is coordinated by the Equality and Inclusion Unit of the National Institute for Health and Welfare, Finland. The study is conducted in collaboration with the Finnish Immigration Service and the reception centres as a part of an EU Asylum, Migration and Integration Fund project aiming at developing evidence-based health examination protocol for newly arrived asylum seekers (21). The Finnish Immigration Service under the Ministry of Interior is responsible for regulation, organisation, steering, supervision and funding of sheltering and health services for asylum seekers, whereas the reception centres are the main providers of health care services (22). Close collaboration with stakeholders provides with a unique opportunity for direct implementation of research findings into practice. Evidence-based development of the health examination protocol will promote equality in the access and quality of services provided for asylum seekers. Stages of the TERTTU Survey are outlined in Table 1.

[Table 1 about here]

A multidisciplinary consortium was formed at the planning stage of the survey consisting of experts from different departments and units of the National Institute for Health and Welfare as well as from other collaborating bodies such as regional authorities, universities, non-governmental organisations and experts working in clinical practice. Conceptual framework of the TERTTU Survey is presented in Figure 1. Asylum seekers may arrive at any life stage and their health and wellbeing are influenced by pre-migration, migration process-related and post migration experiences. Sociodemographic and socioeconomic factors mediate the influence of migration-related factors and other exposures throughout the life course (23). Authorities and institutions regulating the asylum process have a central impact on health outcomes of asylum seekers through defining the rights for services and quality criteria for the services provided to asylum seekers.

[Figure 1 about here]

1  
2  
3 Data collection of the TERTTU Survey is implemented by eight trained multilingual research nurses. In  
4 addition to having a good command of Finnish, languages spoken by research nurses include English,  
5 Arabic, Somali, Persian, Dari, Sorani dialect of Kurdish, Urdu, Russian, Portuguese and French. All of the  
6 study material given to the participants (including information leaflets and consent forms), have been  
7 translated into the most common languages spoken by asylum seekers, which are English, Arabic, Somali,  
8 Persian, Sorani dialect of Kurdish and Russian. Material is translated into additional languages over the  
9 course of the survey if needed. If the study participant speaks another language than the ones spoken by  
10 research nurses, a professional interpreter is used. Professional interpreters are used from accredited  
11 companies and are briefed concerning the importance of standardised protocol.  
12  
13  
14  
15  
16  
17  
18  
19  
20  
21  
22  
23  
24  
25  
26

## 27 **2.1 Study population**

28  
29  
30 The study population includes all newly arrived asylum seekers, who have applied for asylum for the first  
31 time in Finland. Exclusion criteria are persons who: 1) reside in a detention centre; 2) have applied for  
32 asylum in another country and are transferred to Finland based on international agreements (internal  
33 transfer); 3) have been returned to Finland according to the Dublin regulation; 4) have previously had a  
34 residence permit in Finland; 5) children born in Finland. The number of asylum applications varies on a  
35 weekly basis. Participants are recruited into the study approximately two weeks following registration of  
36 their asylum application in Finland. Such sampling frame requires continuous sampling of study participants  
37 compared with retrospective sampling that is generally used in health interview and health examination  
38 surveys. There are approximately 40-60 new asylum applications a week fitting the selection criteria of the  
39 study, which enables inclusion of the total population sample into the study.  
40  
41  
42  
43  
44  
45  
46  
47  
48  
49  
50  
51

52  
53 Both adults and children are invited to participate in the study. This enables to link family members. The  
54 population-based sample is drawn on a weekly basis from an electronic database containing data on all  
55 asylum seekers in Finland and maintained by the Finnish Immigration Services. Each asylum seeker receives  
56 a unique identity number that is used throughout the asylum seeking process. Additional registered  
57  
58  
59  
60

1  
2  
3 information includes date of the asylum application, name, sex, date and country of birth, nationality,  
4  
5 mother tongue and desired language of the interpreter services.  
6  
7  
8  
9

## 10 11 **2.2 Recruitment of study participants** 12

13  
14 Currently (2018), there are altogether 49 reception centres in Finland, out of which 43 are for adults and  
15  
16 families and 6 for unaccompanied minors. The number of reception centres varies depending on the  
17  
18 number of asylum applications and the speed of the decision processes. A substantial majority of adults  
19  
20 and families are initially directed to transit reception centres, where they wait for the asylum interview.  
21  
22 Transit reception centres are located in Helsinki (capital of Finland), Turku, Joutseno and Oulu (Figure 2).  
23  
24 Some newly arrived asylum seekers arrange private housing for themselves. In such case, they are allocated  
25  
26 to the geographically closest reception centre for provision of health and social services throughout the  
27  
28 asylum process. Unaccompanied minors are usually directed to units for minors, where they remain  
29  
30 throughout the entire asylum process. Since participants of the TERTTU Survey are recruited at an early  
31  
32 stage of the asylum process, transit reception centres are the permanent study sites. However since the  
33  
34 TERTTU Survey is based on a total population sample, the survey is conducted in any other national  
35  
36 reception centres depending on where the persons included into the study sample are situated.  
37  
38  
39  
40

41  
42 [Figure 2 about here]  
43  
44

45  
46 Recruitment of study participants in transit reception centres is outlined in Figure 3. Recruitment is the  
47  
48 responsibility of the research nurse. However, reception centre personnel have a central role in facilitating  
49  
50 the initial contact between the research nurse and persons belonging to the study sample. An invitation  
51  
52 with a set time for a reach-out appointment with the research nurse and a brief information leaflet are  
53  
54 delivered to asylum seekers by reception centre personnel. The information leaflet is available in the study  
55  
56 languages and is designed to be understandable even with limited language or literacy skills. [Link to  
57  
58 Supplement Figure 1]  
59  
60

1  
2  
3 [Figure 3 about here]  
4  
5

6 The purpose of the reach-out appointment is that the research nurse makes personal contact with the  
7  
8 persons invited to participate in the study. By providing information on the aims and content of the study,  
9  
10 the research nurse ensures that the person invited to participate has sufficient information to give  
11  
12 informed consent for participation. Booking a reach-out time is the only possibility for personal contact as  
13  
14 no telephone numbers are available for newly-arrived asylum seekers and research nurses do not have  
15  
16 access to the living areas of the reception centres due to security regulations. If the asylum seeker does not  
17  
18 arrive to their reach-out appointment, the research nurse requests the reception centre's social counselors  
19  
20 to see if the person is in their dorm. If the person is on the premises of the reception centre, they are asked  
21  
22 to come to the reception desk and talk with the research nurse. Otherwise, a new reach-out appointment is  
23  
24 booked up to three times, unless the person expresses explicit decline from participation to reception  
25  
26 centre personnel.  
27  
28  
29

30  
31 Asylum seekers living in other reception centres or in private housing are also approached through the  
32  
33 reception centre as no personal contact information is initially available. The research nurse or the project  
34  
35 coordinator contact the reception centre director via e-mail and explain the purpose of the study. Following  
36  
37 this, the research nurse contacts the reception centre for specific arrangements. Telephone contact  
38  
39 information is usually available for persons living in private housing and in such case the research nurse  
40  
41 contacts persons invited to participate directly by telephone. In case of unaccompanied minors, the initial  
42  
43 contact is with the reception centre to enquire for contact details of the legal guardian, who is approached  
44  
45 by e-mail or by telephone by the research coordinator. If the legal guardian gives consent, the  
46  
47 unaccompanied minor is contacted and invited to participate in the study.  
48  
49  
50

51  
52 Two hours are booked in the research nurses schedule for each reach out time, which allows for conduct of  
53  
54 the study straight away if the person agrees to participate. Alternatively, another time is agreed upon. Prior  
55  
56 to starting the interview and the health examination, the research nurse confirms the identity of the  
57  
58 participant by checking their personal identification card. Participants are provided with detailed written  
59  
60

1  
2  
3 information about the study, including the purpose of the study, how the collected information will be  
4 used, data protection, the rights of participants and who is responsible for conduct of the study. If written  
5 information is not available in the language spoken by the asylum seeker or the person is illiterate, the  
6 research nurse goes through written information with assistance of the professional interpreter. The  
7 purpose of the study is explained to minors in an age-appropriate manner.  
8  
9

10  
11  
12  
13  
14  
15 Participants are asked to sign written informed consent. Separate consent is acquired for: 1) the use of the  
16 data for research and development purposes within the National Institute for Health and Welfare; 2)  
17 sharing anonymised data with researchers outside the institute; 3) record linkage of electronic patient  
18 register data to survey data; 4) record linkage of national register data to survey data if asylum is granted in  
19 Finland. Guardians of minors sign informed consent. Additionally, children aged 7 years and older also give  
20 written informed consent. The consent form is designed in age-appropriate manner.  
21  
22  
23  
24  
25  
26  
27  
28  
29  
30  
31

### 32 **2.3 Data collection**

33  
34  
35 The study consists of a standardised face-to-face interview and a health examination. Duration of the study  
36 is approximately 1 hour if conducted in the mother tongue of the participant and approximately 2 hours if  
37 an interpreter is used. Some of the questions concerning mental health as well as sexual and reproductive  
38 health can be completed as self-administered questionnaires during the interview. The research nurse  
39 records whether these were interviewed or self-completed by the participants. Interviews and health  
40 examinations have been tailored for four age groups: 1) adults; 2) 13-17 year-olds; 3) 7-12 year-olds and 4)  
41 0-6 years. Adults and 13-17 year-olds provide their own answers for the interview, whereas the guardians  
42 of 0-12 year-olds answer to the interview questions concerning children. Minors aged 0-12 years  
43 participate only in the health examination. Research nurses received extensive training over the course of  
44 eight days on research methods, purpose and content of the study, interview techniques as well as on  
45 conduct of standardised interview and health examination. Quality control of data collection is also  
46  
47  
48  
49  
50  
51  
52  
53  
54  
55  
56  
57  
58  
59  
60

1  
2  
3 monitored at different stages of data collection following the European Health Examination Survey (EHES)  
4  
5 fieldwork quality control guidelines (24).  
6  
7  
8  
9

### 10 11 **Face-to-face interview** 12

13  
14 The face-to-face interview consists of measures used for assessment of the health, wellbeing, service needs  
15  
16 of asylum seekers as well as for identification of vulnerable populations. Use of simple language was taken  
17  
18 into account. When appropriate, selected measures are comparable with those used in other population-  
19  
20 based surveys conducted among the general population as well as among populations of migrant origin  
21  
22 permanently living in Finland. The content of the interview by age group is outlined in Table 2. The themes  
23  
24 covered in the interview for adults include sociodemographics, asylum seeking journey, literacy, previous  
25  
26 socioeconomic status, health status, sexual and reproductive health, traumatic events, mental health,  
27  
28 health behaviour and social networks. The interview for children under the age of 18 covers similar themes  
29  
30 when relevant. Additionally, early childhood and development are also covered.  
31  
32  
33

34  
35 [Table 2 about here]  
36  
37  
38  
39  
40  
41  
42  
43  
44  
45  
46  
47  
48  
49  
50  
51  
52  
53  
54  
55  
56  
57  
58  
59  
60



### ***Health examination***

Health examination measurements are carried out following EHES protocol (24). The content of the health examination is outlined in Table 3. The health examination of adults and 13-17 year-olds consists of standardised measurements of weight, height, waist circumference, upper arm circumference, blood pressure, and a dental examination. For children belonging to the 7-12 years age group, health examination consists of measurements of weight and height, dental examination and evaluation of condition of the skin. The health examination of children aged 0-6 years consists of evaluation of the condition of the skin and examination for Bacillus Calmette-Guérin (BCG) scar.

[Table 3 about here]

### ***Linkage with register-based data***

Upon separate consent, data collected during the TERTTU Survey can be supplemented with unified national electronic health record (EHR) data of the reception centres on the basis of the unique personal identity number. This allows for following the health of asylum seekers from the initial point of arrival to Finland throughout the entire reception processes. Upon a separate consent, data collected during the TERTTU Survey can be supplemented with data from the national registers on the health, wellbeing and health service use of those who have been granted an asylum (Table 4). Feasibility of this record linkage will be evaluated after a follow-up period. Record linkage with national registers provides with a unique opportunity to examine how the health of asylum seekers evolves throughout their life course.

[Table 4 about here]

### ***Linkage with biological data from the Immunity Against Vaccine Preventable Diseases Study***

Parallel to the TERTTU Survey, a cross-sectional Immunity Against Vaccine Preventable Diseases Study is conducted between 2018 and 2019. The aim of the Immunity Against Vaccine Preventable Diseases Study is to assess previous immunity against measles, mumps, rubella, diphtheria, tetanus and polio among asylum seekers coming from countries with higher incidence of vaccine preventable diseases (25). The study recruits all asylum seekers from Afganistan, Iraq, Russia and Somalia who have not yet received vaccines in Finland, with the aim of gathering a minimum 100 samples per each study group. Blood samples are drawn in connection with the voluntary multiphasic screening for blood-borne and sexually transmitted infections currently offered to all asylum seekers during the initial health assessment. Nurses working in transit centers are responsible for recruitment of study participants. Participants provide written informed consent. Upon a separate consent, results from the Immunity Against Vaccine Preventable Diseases Study can be linked with information on sociodemographics and self-reported history of vaccinations collected during the TERTTU Survey. The Immunity Against Vaccine Preventable Diseases Study is coordinated by the National Institute for Health and Welfare and funded by the National Vaccination Program. The study has been approved by the Coordinating Ethics Committee of the Helsinki and Uusimaa Hospital District (HUS/3330/2017).

#### **2.4 Power and data analysis**

The aim is to gather data on a minimum of 1000 newly arrived asylum seekers. The minimum sample size for the study was calculated manually. Limited project time frame and resources restrict gathering a larger sample. The formula for calculations is enclosed as supplementary material [Link to Supplement Figure 2]. Based on register data on the numbers, country of origin and age of first-time asylum applicants between the years of 2014 and 2016, it is projected that a sample of 1000 participants would constitute of 700 for adults and 100 minors for each of the minor age groups (0-6 years, 7-12 years and 13-17 years). This estimation was calculated assuming simple random sampling. In practice, however, with total population

1  
2  
3 sampling, participation in the study will be influenced by family clusters. Members of the same family are  
4 likely to either all participate in the study or decline from participation. Calculation of estimates assuming  
5 cluster sampling was, however, not possible at the planning stage of the study because the available  
6 register data on asylum applicants from the previous years does not include information on how many  
7 families have arrived, nor on the composition of these families.  
8  
9  
10  
11  
12

13  
14  
15 Using simple random sampling, an estimate of 700 adults would have a confidence interval of roughly  $\pm$   
16 3.5%, and  $\pm$ 5% when examined by sex (n=350). A sample of 100 for each minor age group would result in  
17 confidence intervals of  $\pm$ 10% or less. Thus, projected confidence intervals will produce estimates of  
18 adequate accuracy if simple random sampling were applied (26). It should be, however, stressed that the  
19 confidence intervals presented above were calculated using simple random sampling, whereas in practice  
20 cluster sampling (from family units) will be done. This is an acknowledged limitation in this study's power  
21 calculations. Therefore, the provided confidence intervals should be viewed as initial estimates only, and  
22 wider confidence intervals than these are expected. This issue will be counteracted by using finite  
23 population correction (27), the formula for which is presented in the Supplement Figure 2. After finite  
24 population correction is applied, it is expected that despite cluster sampling, data on a minimum of 1000  
25 persons will nonetheless produce estimates of adequate accuracy. Family clusters will be taken into  
26 account in all of the data analyses following the end of data collection.  
27  
28  
29  
30  
31  
32  
33  
34  
35  
36  
37  
38  
39  
40  
41  
42

43 The main findings of the study will be reported as a report focusing on basic findings as mean and median  
44 values, as well as proportions and their confidence intervals. These will be presented separately for adults,  
45 13-17 year-olds, 7-12 year-olds and 0-6 year-olds, and by regions of origin. The categories for regions of  
46 origin will depend on the final number of participants from different regions. Groupings will be made  
47 according to established regional categories, for example according to the United Nations Statistics Division  
48 groupings (28) or the World Bank regional groupings (29). The effect of non-response will be assessed  
49 based on age, sex and country of origin of all asylum seekers registered in the national electronic asylum  
50  
51  
52  
53  
54  
55  
56  
57  
58  
59  
60

1  
2  
3 database maintained by the Finnish Immigration Service. Based on these analyses, sample weights will be  
4  
5 calculated, if necessary, to correct for the effect of non-response.  
6  
7

8 Following the publication of the basic report, data will be made available to researchers for in-depth  
9  
10 analyses. Total population sampling allows to examine family units. This provides with a unique opportunity  
11  
12 to examine how the health, wellbeing and health service needs of, for example, parents influence those of  
13  
14 their children in later in-depth analyses. These regression analyses will be carried out using a mixed model  
15  
16 that includes family unit as a random effect.  
17  
18

## 23 **2.5 Patient and Public Involvement**

24  
25  
26 The study was designed to fill the gap in knowledge on the health, wellbeing and health service use among  
27  
28 asylum seekers. The study was designed consulting a consortium of experts on the topic of the health and  
29  
30 wellbeing of asylum seekers. Persons with asylum seeker background were included into the steering  
31  
32 committee and have provided their insights on the content of the study. No patients were directly involved  
33  
34 in recruitment or conduct of the study. Results of the study benefit participants in that they receive  
35  
36 information on their health and are consulted to seek further medical advice if a need for such is identified  
37  
38 over the course of the study. Results will be disseminated in reception centres and through media and  
39  
40 reports on a national level.  
41  
42  
43  
44  
45  
46  
47  
48

## 49 **3 Ethics and Dissemination**

### 52 ***Ethical aspects***

53  
54  
55 Participation in the TERTTU Survey is based on voluntary informed written consent. Participants are  
56  
57 informed concerning personal data protection, sovereignty of the study in terms of the person's asylum  
58  
59 seeking process and confidentiality of the answers. It is made clear that the TERTTU Survey does not  
60

1  
2  
3 substitute the initial health assessment provided by the reception centres. Furthermore, participants are  
4 informed that they are fully entitled to decline from participation or interrupt participation at any moment  
5 without the need for providing a reason and that they are also entitled to request deletion of their data.  
6  
7  
8  
9  
10 Participants are also informed that they are entitled to leave some questions unanswered and that they  
11 may refuse any measurement.  
12  
13

14  
15 All of the data is collected during a one-on-one research appointment. None of the data collected during  
16 the study is shared with a third person (for example spouse, parent of 13-17 year-olds who participate  
17 independently, or reception centre personnel). Research nurses are bound by a confidentiality clause and  
18 have been trained in key principles of research ethics. Professional interpreters provide their services via  
19 the telephone, which provides a higher degree of confidentiality for the participant.  
20  
21  
22  
23  
24  
25

26  
27 Participants are given oral and written feedback on their health examination measures. If a need for further  
28 health care services arises over the course of the survey visit, research nurses recommend participants to  
29 contact the reception centre nurse. All of the TERTTU Survey data is managed following the National  
30 Institute for Health and Welfare's protocol for handling sensitive data. Each study participant is given a  
31 random study ID number and data is handled without personal identification information.  
32  
33  
34  
35  
36  
37  
38

39 Incentives (for example bus cards, toy packages for children) valued at approximately 10 euros are given to  
40 all participants. The TERTTU Survey has been approved by the Coordinating Ethics Committee of the  
41 Helsinki and Uusimaa Hospital District (reference number HUS/3306/2017).  
42  
43  
44  
45  
46  
47  
48  
49

### 50 ***Dissemination of information about the TERTTU Survey***

51  
52 Information about the TERTTU Survey is broadly disseminated both at national and international level at all  
53 stages of the study. Since the TERTTU Survey has been specifically designed to bridge the gap in knowledge  
54 on the health and wellbeing of asylum seekers in Finland, Ministry of Interior, Ministry of Social Welfare  
55 and Health and Ministry of Economic Affairs and Employment are regularly updated on the progress of the  
56  
57  
58  
59  
60

1  
2  
3 study and these updates are transferred into various country reports compiled by the ministries. The  
4  
5 TERTTU Survey has been presented to a number of international collaborators and at several international  
6  
7 congresses. Possibilities for research collaboration with international partners will be explored.  
8  
9

10 The main findings of the baseline TERTTU Survey will be reported by the end of summer 2019 and they will  
11  
12 be widely disseminated at both national and international level. Following this, TERTTU Survey data will be  
13  
14 available for research purposes upon an accepted study proposal. Evidence-based health examination  
15  
16 protocol will be developed and disseminated across reception centres on a national level by the end of  
17  
18 2019.  
19  
20  
21  
22  
23  
24  
25

## 26 **Acknowledgements**

27  
28  
29 The authors would like to acknowledge experts at the Finnish Immigration Service and all of the personnel  
30  
31 of collaborating reception centres for their substantial efforts in facilitating implementation of the study. All  
32  
33 of the participants in the study, the research nurses involved in baseline data collection, the  
34  
35 multidisciplinary consortium of experts from the National Institute for Health and Welfare and  
36  
37 collaborating bodies as well as the steering committee of the Developing the health examination protocol  
38  
39 for asylum seekers in Finland project also need to be acknowledged. Finally, the authors would like to  
40  
41 acknowledge Sinikka Kytö and Kaaren Erhola for the graphical visualization of the TERTTU Survey material.  
42  
43  
44  
45  
46  
47  
48  
49

## 50 **Author contributions**

51  
52  
53 AC and OS conceptualised the initial idea for the national-level project aiming at developing the health  
54  
55 examination protocol for asylum seekers in Finland within which the TERTTU Survey is implemented. AC  
56  
57 developed the original grant proposal. NS, AC, PK, KL and EL have been involved in planning and  
58  
59  
60

1  
2  
3 coordination of the study. OS has been the main contact on the behalf of the collaborating partner (Finnish  
4  
5 Immigration Service). PT has been involved in the design and coordination of the Immunity Against Vaccine  
6  
7 Preventable Diseases Study. NS prepared the first draft of the manuscript. All authors (AC, PK, KL, PT, OS,  
8  
9 NS) have provided critical feedback and contributed to revision of the manuscript. All authors have read  
10  
11 and approved the final manuscript.  
12  
13

## 14 15 **Funding**

16  
17  
18 TERTTU Survey is implemented as a part of the Developing the health examination protocol for asylum  
19  
20 seekers in Finland: A national development project funded by the EU Asylum, Migration and Integration  
21  
22 Fund.  
23  
24

## 25 26 **Competing interests**

27  
28  
29 The authors declare no competing interests.  
30  
31  
32  
33  
34  
35  
36  
37  
38  
39  
40  
41  
42  
43  
44  
45  
46  
47  
48  
49  
50  
51  
52  
53  
54  
55  
56  
57  
58  
59  
60

## References

- (1) Bozorgmehr K, Goosen S, Mohsenpour A, Kuehne A, Razum O, Kunst AE. How Do Countries' Health Information Systems Perform in Assessing Asylum Seekers' Health Situation? Developing a Health Information Assessment Tool on Asylum Seekers (HIATUS) and Piloting It in Two European Countries. *Int J Environ Res Public Health* 2017 Aug 8;14(8):10.3390/ijerph14080894.
- (2) Bozorgmehr K, Razum O. Forced Migration and Global Responsibility for Health Comment on "Defining and Acting on Global Health: The Case of Japan and the Refugee Crisis". *Int J Health Policy Manag* 2016 Nov 5;6(7):415-418.
- (3) European Union. Who qualifies for international protection. Accessed on June 1 2018 from [https://ec.europa.eu/home-affairs/what-we-do/policies/asylum/refugee-status\\_en](https://ec.europa.eu/home-affairs/what-we-do/policies/asylum/refugee-status_en). 2018.
- (4) Alberer M, Malinowski S, Sanftenberg L, Schelling J. Notifiable infectious diseases in refugees and asylum seekers: experience from a major reception center in Munich, Germany. *Infection* 2018 Jun;46(3):375-383.
- (5) van Berlaer G, Bohle Carbonell F, Manantsoa S, de Bethune X, Buyl R, Debacker M, et al. A refugee camp in the centre of Europe: clinical characteristics of asylum seekers arriving in Brussels. *BMJ Open* 2016 Nov 24;6(11):e013963-2016-013963.
- (6) Bloch-Infanger C, Battig V, Kremo J, Widmer AF, Egli A, Bingisser R, et al. Increasing prevalence of infectious diseases in asylum seekers at a tertiary care hospital in Switzerland. *PLoS One* 2017 Jun 15;12(6):e0179537.
- (7) Leiler A, Bjarta A, Ekdahl J, Wasteson E. Mental health and quality of life among asylum seekers and refugees living in refugee housing facilities in Sweden. *Soc Psychiatry Psychiatr Epidemiol* 2018 Dec 22.
- (8) Georgiadou E, Morawa E, Erim Y. High Manifestations of Mental Distress in Arabic Asylum Seekers Accommodated in Collective Centers for Refugees in Germany. *Int J Environ Res Public Health* 2017 Jun 7;14(6):10.3390/ijerph14060612.
- (9) Bozorgmehr K, Schneider C, Joos S. Equity in access to health care among asylum seekers in Germany: evidence from an exploratory population-based cross-sectional study. *BMC Health Serv Res* 2015 Nov 9;15:502-015-1156-x.
- (10) Schneider C, Joos S, Bozorgmehr K. Disparities in health and access to healthcare between asylum seekers and residents in Germany: a population-based cross-sectional feasibility study. *BMJ Open* 2015 Nov 4;5(11):e008784-2015-008784.
- (11) Buber-Ennser I, Kohlenberger J, Rengs B, Al Zalak Z, Goujon A, Striessnig E, et al. Human Capital, Values, and Attitudes of Persons Seeking Refuge in Austria in 2015. *PLoS One* 2016 Sep 23;11(9):e0163481.
- (12) Pavli A, Maltezou H. Health problems of newly arrived migrants and refugees in Europe. *J Travel Med* 2017 Jul 1;24(4):10.1093/jtm/tax016.
- (13) Tiittala P, Tuomisto K, Puumalainen T, Lyytikainen O, Ollgren J, Snellman O, et al. Public health response to large influx of asylum seekers: implementation and timing of infectious disease screening. *BMC Public Health* 2018 Sep 24;18(1):1139-018-6038-9.



- 1  
2  
3 (14) Tiittala P SE. Asylum seekers' access to mental health and dental health services, and prevention of  
4 infection disease problems in Finland in 2017. Research brief 10 National Institute for Health and Welfare,  
5 Helsinki, Finland 2018.  
6  
7 (15) Tiittala P, Räisänen P, Lilja E, Castaneda A, Snellman O, Helve O, et al. Healthcare service use and health  
8 concerns among asylum seekers in Finland in 2015–2016. Data brief 29, National Institute for Health and  
9 Welfare, Helsinki, Finland. Accessed on January 19, 2019 from <http://urn.fi/URN:ISBN:978-952-343-187-4>.  
10 2018.  
11  
12 (16) Skogberg N, Laatikainen T, Jula A, Harkanen T, Vartiainen E, Koponen P. Contribution of  
13 sociodemographic and lifestyle-related factors to the differences in metabolic syndrome among Russian,  
14 Somali and Kurdish migrants compared with Finns. *Int J Cardiol* 2017 Apr 1;232:63-69.  
15  
16 (17) Rask S, Sainio P, Castaneda AE, Harkanen T, Stenholm S, Koponen P, et al. The ethnic gap in mobility: a  
17 comparison of Russian, Somali and Kurdish origin migrants and the general Finnish population. *BMC Public*  
18 *Health* 2016 Apr 18;16:340-016-2993-1.  
19  
20 (18) Rask S, Suvisaari J, Koskinen S, Koponen P, Molsa M, Lehtisalo R, et al. The ethnic gap in mental health:  
21 A population-based study of Russian, Somali and Kurdish origin migrants in Finland. *Scand J Public Health*  
22 2016 May;44(3):281-290.  
23  
24 (19) Bozorgmehr K, Razum O. Effect of Restricting Access to Health Care on Health Expenditures among  
25 Asylum-Seekers and Refugees: A Quasi-Experimental Study in Germany, 1994-2013. *PLoS One* 2015 Jul  
26 22;10(7):e0131483.  
27  
28 (20) Bozorgmehr K, Wenner J, Razum O. Restricted access to health care for asylum-seekers: applying a  
29 human rights lens to the argument of resource constraints. *Eur J Public Health* 2017 Aug 1;27(4):592-593.  
30  
31 (21) National Institute for Health and Welfare. Developing the health examination protocol for asylum  
32 seekers in Finland: A national development project (TERTTU). Accessed November 1, 2018 from  
33 [https://thl.fi/en/web/thlfi-en/research-and-expertwork/projects-and-programmes/developing-the-health-](https://thl.fi/en/web/thlfi-en/research-and-expertwork/projects-and-programmes/developing-the-health-examination-protocol-for-asylum-seekers-in-finland-a-national-development-project-terttu)  
34 [examination-protocol-for-asylum-seekers-in-finland-a-national-development-project-terttu](https://thl.fi/en/web/thlfi-en/research-and-expertwork/projects-and-programmes/developing-the-health-examination-protocol-for-asylum-seekers-in-finland-a-national-development-project-terttu). 2018.  
35  
36 (22) Helve O, Tuomisto K, Tiittala P, Puumalainen T. Asylum seekers' health care in Finland in 2015–2016.  
37 Report on a survey of reception centres. Helsinki, Finland 2016. ISBN 978-952-302-774-9 (printed); ISBN  
38 978-952-302-775-6 (pdf). Accessed on January 15, 2019 from: [http://urn.fi/URN:ISBN:978-952-](http://urn.fi/URN:ISBN:978-952-302-775-6)  
39 [302-775-6](http://urn.fi/URN:ISBN:978-952-302-775-6). National Institute for Health and Welfare 2016;19.  
40  
41 (23) Abubakar I, Aldridge RW, Devakumar D, Orcutt M, Burns R, Barreto ML, et al. The UCL-Lancet  
42 Commission on Migration and Health: the health of a world on the move. *Lancet* 2018 Dec  
43 15;392(10164):2606-2654.  
44  
45 (24) Tolonen H. Part B, Fieldwork Procedures. *Directions* 2016\_14. Accessed on July 1, 2018 from:  
46 <http://urn.fi/URN:ISBN:978-952-302-701-5>. 2016.  
47  
48 (25) Mipatrini D, Stefanelli P, Severoni S, Rezza G. Vaccinations in migrants and refugees: a challenge for  
49 European health systems. A systematic review of current scientific evidence. *Pathog Glob Health*  
50 2017;111(2):59-68.  
51  
52  
53  
54  
55  
56  
57  
58  
59  
60

1  
2  
3  
4  
5  
6  
7  
8  
9  
10  
11  
12  
13  
14  
15  
16  
17  
18  
19  
20  
21  
22  
23  
24  
25  
26  
27  
28  
29  
30  
31  
32  
33  
34  
35  
36  
37  
38  
39  
40  
41  
42  
43  
44  
45  
46  
47  
48  
49  
50  
51  
52  
53  
54  
55  
56  
57  
58  
59  
60

(26) Lwanga SK, Lemeshow S. Sample size determination in health studies : a practical manual. Geneva: World Health Organization. Accessed on July 1, 2018 from: <http://www.who.int/iris/handle/10665/40062>. 1991.

(27) Lehtinen R PE. Practical Methods for Design and Analysis of Complex Surveys. Second Edition. ed. Published Online: 10 FEB 2004, DOI: 10.1002/0470091649: John Wiley & Sons, Ltd; 2004.

(28) United Nations Statistics Division. Methodology: Standard country or area codes for statistical use. Accessed on January 23, 2019 from: <https://unstats.un.org/unsd/methodology/m49/>. 2019.

(29) The World Bank. Data: World Bank Country and Lending Groups. Accessed on January 23, 2019 from: <https://datahelpdesk.worldbank.org/knowledgebase/articles/906519-world-bank-country-and-lending-groups>. 2019.

(30) UNESCO Institute of Statistics. International Standard Classification of Education ISCED 2011. 2012; Accessed on October 20, 2018 from: <http://uis.unesco.org/sites/default/files/documents/international-standard-classification-of-education-isced-2011-en.pdf>. 2018.

(31) Eurostat. European Health Interview Survey (EHIS Wave 3). Methodological manual. Luxembourg, Publications office of the European Union. <https://ec.europa.eu/eurostat/documents/3859598/8762193/KS-02-18-240-EN-N.pdf/5fa53ed4-4367-41c4-b3f5-260ced9ff2f6>. 2018.

(32) Pynoos R, Rodriguez N, Steinberg A, Stuber M, & Frederick C. UCLA PTSD Index for DSM-IV. Accessed on July 1, 2018 from <https://www.mc.vanderbilt.edu/coe/tfcbt/workbook/Assessment/UCLA%20PTSD%20Index-%20Parent.pdf>. 1998.

(33) Loeb M, Cappa C, Cialesi R, de Palma E. Measuring child functioning: the Unicef/ Washington Group Module. Salud Publica Mex 2017 Jul-Aug;59(4):485-487.

(34) Mollica RF, Caspi-Yavin Y, Bollini P, Truong T, Tor S, Lavelle J. The Harvard Trauma Questionnaire. Validating a cross-cultural instrument for measuring torture, trauma, and posttraumatic stress disorder in Indochinese refugees. J Nerv Ment Dis 1992 Feb;180(2):111-116.

(35) Derogatis LR, Lipman RS, Rickels K, Uhlenhuth EH, Covi L. The Hopkins Symptom Checklist (HSCL): a self-report symptom inventory. Behav Sci 1974 Jan;19(1):1-15.

(36) Dimitrova M, Gologanova K, Friele B, Rueffer J., Kroo A, Szilvia K, et al. PROTECT - Process of recognition and Orientation of Torture Victims in European Countries to Facilitate Care and Treatment. Accessed on July 1, 2018 <http://protect-able.eu/wp-content/uploads/2013/01/protect-global-eng.pdf>.

(37) Bush K, Kivlahan DR, McDonnell MB, Fihn SD, Bradley KA. The AUDIT alcohol consumption questions (AUDIT-C): an effective brief screening test for problem drinking. Ambulatory Care Quality Improvement Project (ACQUIP). Alcohol Use Disorders Identification Test. Arch Intern Med 1998 Sep 14;158(16):1789-1795.

(38) ESPAD. Questionnaire of Substance Use. The European School Survey Project on Alcohol and Other Drugs. Accessed on July 1, 2018 from [http://www.espad.org/sites/espad.org/files/ESPAD\\_Questionnaire\\_2011.pdf](http://www.espad.org/sites/espad.org/files/ESPAD_Questionnaire_2011.pdf). 2011.

**Table 1 Stages of the TERTTU Survey**

| <b>Baseline data collection</b>                            |                                                                                                                                                                                       |
|------------------------------------------------------------|---------------------------------------------------------------------------------------------------------------------------------------------------------------------------------------|
| 3-10/2017                                                  | Planning the data collection of the baseline TERTTU Survey.                                                                                                                           |
| 9/2017-1/2018                                              | Receiving Coordinating Ethics Committee of the Helsinki and Uusimaa Hospital District permission for implementing baseline and follow-up studies.                                     |
| 11/2017                                                    | Piloting the TERTTU Survey among volunteers with asylum seeker background.                                                                                                            |
| 12/2017-1/2018                                             | Recruitment of the research nurses.                                                                                                                                                   |
| 2/2018                                                     | Training of the research nurses.                                                                                                                                                      |
| 3/2018-12/2018                                             | Baseline data collection.                                                                                                                                                             |
| 2/2019-4/2019                                              | Data management, data quality assessment and analysis.                                                                                                                                |
| 5-6/2019                                                   | Reporting basic findings.                                                                                                                                                             |
| 7/2019 -                                                   | Data available for research purposes to other researchers upon an accepted study proposal by the National Institute for Health and Welfare.                                           |
| 7-12/2019                                                  | Dissemination of the main findings of the baseline TERTTU Survey and use for evidence-based development of the national health examination protocol for newly arrived asylum seekers. |
| <b>1. Follow-up of TERTTU Survey participants</b>          |                                                                                                                                                                                       |
| 2020 onwards                                               | Linkage of reception centre electronic health records to baseline TERTTU Survey data based on unique asylum process identification number.                                            |
| <b>2. Follow-up of baseline TERTTU Survey participants</b> |                                                                                                                                                                                       |
| 2020 onwards                                               | Feasibility of linking national register data to baseline TERTTU Survey data among persons granted asylum will be evaluated.                                                          |

**Table 2 Content of the interview of the Asylum Seekers Health and Wellbeing Survey (TERTTU)**

| Themes                          | Variable/measure                                                             | Questionnaire instrument/measures                                                                                                                                                                    | Age group                 |
|---------------------------------|------------------------------------------------------------------------------|------------------------------------------------------------------------------------------------------------------------------------------------------------------------------------------------------|---------------------------|
| Sociodemographics               | Age, sex, year of birth, mother tongue, prior country of permanent residence | -                                                                                                                                                                                                    | Adults<br>0-17 year-olds  |
| Asylum seeking journey          | Year when left permanent residence, route to Finland                         | Countries, types of housing and duration of stay in these locations during the asylum journey                                                                                                        | Adults<br>0-17 year-olds  |
| Literacy                        | Language skills, reading and writing skills                                  | Mastery of languages other than mother tongue, ability to read and write (7+ year-olds)                                                                                                              | Adults<br>0-17 year-olds  |
| Previous socioeconomic status   | Education, occupation                                                        | International Standard Classification of Education (ISCED-2011) (30), prior occupation                                                                                                               | Adults                    |
| Health status                   | Self-rated health, presence of long-term conditions                          | Minimum European Health Module (MEHM) (31)                                                                                                                                                           | Adults<br>0-17 year-olds  |
|                                 | Chronic and infectious diseases, medications, current physical symptoms      | Various health conditions diagnosed by a physician, need for regular medication, current medication, various somatic symptoms, tuberculosis symptoms, prior infectious diseases, vaccination history | Adults<br>0-17 year-olds  |
|                                 | Functional capacity                                                          | adapted from Washington Group Module (32)<br>adapted from Unicef/ Washington Group Module (33)                                                                                                       | Adults<br>0-17 year-olds  |
| Early childhood and development | Gestation, early life development                                            | Gestation week at birth, complications during birth, birth weight, height, early life development milestones                                                                                         | 0-12 year-olds            |
|                                 | Growth and development                                                       | Previously identified problems in growth and development                                                                                                                                             | 0-17 year-olds            |
| Sexual and reproductive health  | Sexual behaviour                                                             | Questions related to risk behavior predisposing to sexually transmitted diseases                                                                                                                     | Adults<br>13-17 year-olds |
|                                 | Male circumcision/female genital mutilation                                  | Age of circumcision (if circumcised), problems associated with female genital mutilation                                                                                                             | Adults<br>0-17 year-olds  |
|                                 | Pregnancies and births                                                       | Number of pregnancies, miscarriages, abortions, parity                                                                                                                                               | Adults<br>13-17 year-olds |
| Traumatic events                | Physical trauma due to accident/violence                                     | Types of injuries before/during asylum journey                                                                                                                                                       | Adults                    |
|                                 | Potentially traumatic life events                                            | Various traumatic life events, adapted from Harvard Trauma Questionnaire (34)<br>Potentially traumatic events, adapted from UCLA PTSD INDEX FOR DSM-IV (32)                                          | Adults<br>0-17 year-olds  |

|                 |                                         |                                                                                 |                           |
|-----------------|-----------------------------------------|---------------------------------------------------------------------------------|---------------------------|
| Mental health   | Mental health symptoms                  | HSCL-25 (35,36), PROTECT-able SDQ                                               | Adults<br>2-17 year-olds  |
| Health behavior | Smoking                                 | Frequency of smoking, use of different types of tobacco products                | Adults<br>13-17 year-olds |
|                 | Alcohol use                             | Alcohol use, AUDIT-C (37)<br>Alcohol use, adapted from ESPAD questionnaire (38) | Adults<br>13-17 year-olds |
|                 | Drugs                                   | Use of intravenous and other drugs                                              | Adults<br>13-17 year-olds |
|                 | Diet                                    | Intake of selected food items                                                   | Adults<br>0-17 year-olds  |
|                 | Dental health                           | Frequency of brushing teeth, latest visit to a dentist                          | Adults<br>0-17 year-olds  |
| Social networks | Family members, contact with close ones | Whereabouts of close family members, being able to be in touch with close ones  | Adults<br>0-17 year-olds  |

PROTECT, Process of recognition and Orientation of Torture Victims in European Countries to Facilitate Care and Treatment; AUDIT-C, AUDIT Alcohol Consumption Questionnaire; ESPAD, The European School Survey Project on Alcohol and Other Drugs.

**Table 3 Content of the health examination of the Asylum Seekers Health and Wellbeing Survey (TERTTU)**

| Variable                | Measurement tool                           | Measurement method                                                                                                                                                               | Age group                 |
|-------------------------|--------------------------------------------|----------------------------------------------------------------------------------------------------------------------------------------------------------------------------------|---------------------------|
| Weight                  | Seca 877                                   | Measured wearing no shoes and only light clothing, with no heavy objects in the pockets. If the participant is pregnant, self-reported weight before pregnancy is recorded. (24) | Adults<br>7-17 year-olds  |
| Height                  | Stand-alone stadiometer, Seca 217          | Measured wearing no shoes and standing upright, looking straight ahead. (24)                                                                                                     | Adults<br>7-17 year-olds  |
| Waist circumference     | Soft measuring tape, Hoehstmast            | Measurement taken on bare skin on top of light clothing, half-way between the lowest rib and the top of iliac crest. (24)                                                        | Adults<br>13-17 year-olds |
| Upper arm circumference | Soft measuring tape, Hoehstmast            | Measurement taken on bare skin, with the elbow resting comfortably on the surface of the table at a 90 degree angle.                                                             | Adults<br>13-17 year-olds |
| Blood pressure          | Omron i-C10 digital blood pressure monitor | Measurement taken three times with a one minute interval on bare skin. (24)                                                                                                      | Adults<br>13-17 year-olds |
| Pulse                   | Manually, with a stopwatch                 | Each pulse beat is counted for 60 seconds. (24)                                                                                                                                  | Adults<br>13-17 year-olds |
| Dental examination      | -                                          | Existence of removable teeth prosthesis, number of teeth (without removable teeth prosthesis), standardised evaluation of dental health                                          | Adults<br>7-17 year-olds  |
| Skin condition          | -                                          | Standardised evaluation of skin condition (identification of bruises and rash)                                                                                                   | 0-12 year-olds            |
| BCG scar                | -                                          | Standardised evaluation of the presence of Bacillus Calmette-Guérin (BCG) scar                                                                                                   | 0-6 year-olds             |

**Table 4 Potential register linkages in the TERTTU Survey**

| <b>National register</b>                  | <b>Type of information</b>                                                            |
|-------------------------------------------|---------------------------------------------------------------------------------------|
| Population Register Centre                | Place of residence, marital status, nationality                                       |
| Ministry of Employment and the Economy    | Use of employment services, participation in activities for promoting employment      |
| Social Insurance Institution of Finland   | Social benefits and reimbursements for medical costs                                  |
| National Institute for Health and Welfare | Number and reasons for healthcare visits and hospital care, procedures and treatments |
| Statistics Finland                        | Socio-economic position, education and causes of death                                |

1  
2 **Figure legends**  
3  
4  
5

6 **Figure 1 Conceptual framework of the TERTTU Survey** (Figure 1 preferably reproduced in colour)  
7

8 **Figure 2 Permanent study locations in transit reception centres**  
9

10 **Figure 3 Flow chart of the baseline TERTTU Survey**  
11

12  
13  
14  
15 **Supplement Figure 1 Brief information pamphlet given in connection with booking a time for a reach-out appointment**  
16

17 (Supplement Figure 1 preferably reproduced in colour)  
18

19 **Supplement Figure 2 Formula for calculating the sample size of the TERTTU Survey**  
20  
21  
22  
23  
24  
25  
26  
27  
28  
29  
30  
31  
32  
33  
34  
35  
36  
37  
38  
39  
40  
41  
42  
43  
44  
45  
46





Figure 1 Conceptual framework of the TERTTU Survey

297x145mm (300 x 300 DPI)

1  
2  
3  
4  
5  
6  
7  
8  
9  
10  
11  
12  
13  
14  
15  
16  
17  
18  
19  
20  
21  
22  
23  
24  
25  
26  
27  
28  
29  
30  
31  
32  
33  
34  
35  
36  
37  
38  
39  
40  
41  
42  
43  
44  
45  
46  
47  
48  
49  
50  
51  
52  
53  
54  
55  
56  
57  
58  
59  
60

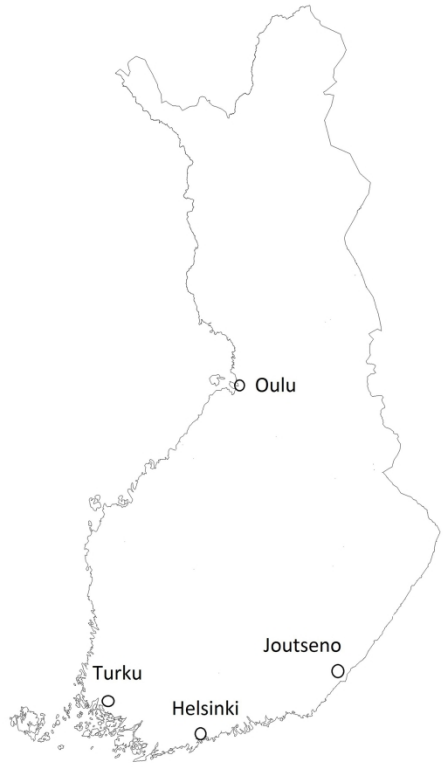

Figure 2 Permanent study locations in transit reception centres  
212x299mm (300 x 300 DPI)



1  
2  
3  
4  
5  
6  
7  
8  
9  
10  
11  
12  
13  
14  
15  
16  
17  
18  
19  
20  
21  
22  
23  
24  
25  
26  
27  
28  
29  
30  
31  
32  
33  
34  
35  
36  
37  
38  
39  
40  
41  
42  
43  
44  
45  
46  
47  
48  
49  
50  
51



TERTTU promotes the health and wellbeing of asylum seekers through:



Gathering representative information on the health of newly arrived asylum seekers



Developing the current health examination protocol



Developing unified practices across reception centers

*Unified practices and evaluation tools.  
Right kind of help at the right time.*

# TERTTU

Developing the health examination  
protocol for newly arrived asylum seekers

## Stages of the project



2017  
Overview of current  
practices, electronic health  
record analysis



2018  
Conducting a Health and  
Wellbeing Survey in  
reception centres



2019  
Developing the health  
examination protocol

For more information: [www.thl.fi/terttu-project](http://www.thl.fi/terttu-project)

## In co-operation

National Institute for Health and Welfare (THL) • Finnish Immigration Service

Supported by The European  
Union, the Asylum, Migration  
and Integration Fund (Amif)



### CONTACT US

**Natalia Skogberg**  
Project Manager, THL  
[natalia.skogberg@thl.fi](mailto:natalia.skogberg@thl.fi)

**Katri-Leena Mustonen**  
Project Coordinator, THL  
[katri-leena.mustonen@thl.fi](mailto:katri-leena.mustonen@thl.fi)

### Notation

|                  |                                                                   |
|------------------|-------------------------------------------------------------------|
| $N$              | total population size                                             |
| $n$              | sample size                                                       |
| $z_{1-\alpha/2}$ | level of confidence according to the standard normal distribution |
| $P$              | estimated proportion of the population                            |
| $d$              | margin of error                                                   |

Assuming a simple random sample, the estimated population proportion with a specified absolute precision is

$$n = z_{1-\alpha/2}^2 P(1 - P) / d_{srs}^2 \quad (\text{Lwanga and Lemeshow 1991, p. 25}).$$

This is equivalent with

$$d_{srs} = z_{1-\alpha/2} \sqrt{\frac{P(1 - P)}{n}}.$$

For a 95 % confidence level  $z_{1-\alpha/2} \approx 1.96$  and for an unknown estimated proportion we use  $P = 0.5$  where the term  $P(1 - P)$  reaches its maximum value. Thus, we get

$$d = 1.96 \sqrt{\frac{0.5(1 - 0.5)}{n}} = \frac{0.98}{\sqrt{n}}.$$

### Example

If  $n = 100$  then  $d_{srs} = 0.98 / \sqrt{100} = 0.098$ .

A sample size of 100 would have a 95 % confidence interval of  $\pm 9.8$  % or less.

## Margin of error in survey data

A sample that includes complex survey design such as different sampling probabilities or cluster sampling, should account for the design effect. The design effect

$$DEFF = var(survey)/var(srs),$$

where  $var(survey)$  is the variation based on the survey design and  $var(srs)$  is the variance assuming a simple random sampling.

If the sample includes a significant amount of the total population, a finite population correction can be applied. The formula for the correction is

$$FPC = \sqrt{\frac{N-n}{N-1}}.$$

A margin of error that accounts for design effect and finite population correction is

$$d_{survey} = z_{1-\alpha/2} \sqrt{\frac{P(1-P)}{n}} \times DEFF \times FPC$$

(Lehtonen and Pahkinen 2004).
