# Supplementary material for: Asylum seekers health and wellbeing (TERTTU) survey: study protocol for a prospective total population health examination survey on the health and service needs of newly arrived asylum seekers in Finland
Source: PubMed Central journal article supplement — BMJ Open. 2019 Apr 8;9(4):e027917. doi: 10.1136/bmjopen-2018-027917 (PMC6500271; doi:10.1136/bmjopen-2018-027917), 2019-04-08
Supplement: bmjopen-2018-027917supp001.pdf [file bmjopen-2018-027917supp001.pdf]

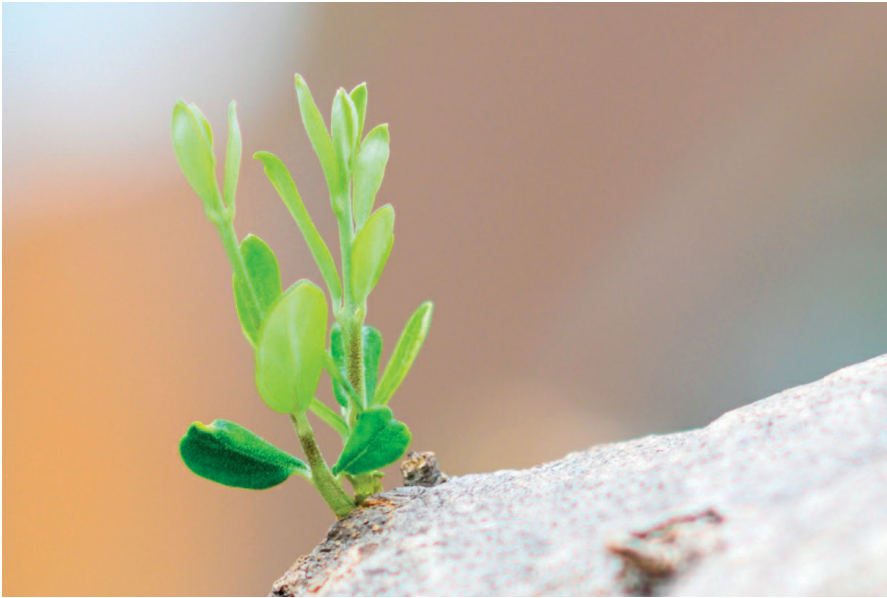

TERTTU promotes the health and wellbeing of asylum seekers through:

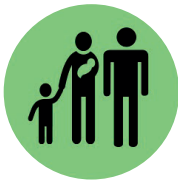

Gathering representative information on the health of newly arrived asylum seekers

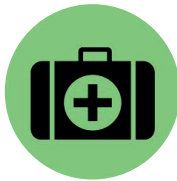

Developing the current health examination protocol

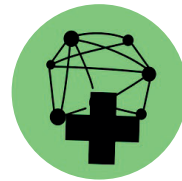

Developing unified practices across reception centers

*Unified practices and evaluation tools.  
Right kind of help at the right time.*

# TERTTU

Developing the health examination  
protocol for newly arrived asylum seekers

## Stages of the project

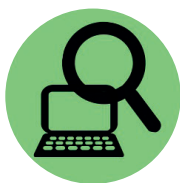

2017  
Overview of current  
practices, electronic health  
record analysis

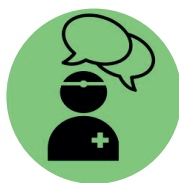

2018  
Conducting a Health and  
Wellbeing Survey in  
reception centres

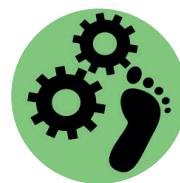

2019  
Developing the health  
examination protocol

For more information: [www.thl.fi/terttu-project](http://www.thl.fi/terttu-project)

## In co-operation

National Institute for Health and Welfare (THL) • Finnish Immigration Service

Supported by The European  
Union, the Asylum, Migration  
and Integration Fund (Amif)

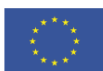

### CONTACT US

**Natalia Skogberg**  
Project Manager, THL  
[natalia.skogberg@thl.fi](mailto:natalia.skogberg@thl.fi)

**Katri-Leena Mustonen**  
Project Coordinator, THL  
[katri-leena.mustonen@thl.fi](mailto:katri-leena.mustonen@thl.fi)
