# Supplementary material for: Asylum seekers health and wellbeing (TERTTU) survey: study protocol for a prospective total population health examination survey on the health and service needs of newly arrived asylum seekers in Finland
Source: PubMed Central journal article supplement — BMJ Open. 2019 Apr 8;9(4):e027917. doi: 10.1136/bmjopen-2018-027917 (PMC6500271; doi:10.1136/bmjopen-2018-027917), 2019-04-08
Supplement: bmjopen-2018-027917supp002.pdf [file bmjopen-2018-027917supp002.pdf]

**Notation**

|                  |                                                                   |
|------------------|-------------------------------------------------------------------|
| $N$              | total population size                                             |
| $n$              | sample size                                                       |
| $z_{1-\alpha/2}$ | level of confidence according to the standard normal distribution |
| $P$              | estimated proportion of the population                            |
| $d$              | margin of error                                                   |

Assuming a simple random sample, the estimated population proportion with a specified absolute precision is

$$n = z_{1-\alpha/2}^2 P(1 - P) / d_{srs}^2 \quad (\text{Lwanga and Lemeshow 1991, p. 25}).$$

This is equivalent with

$$d_{srs} = z_{1-\alpha/2} \sqrt{\frac{P(1 - P)}{n}}.$$

For a 95 % confidence level  $z_{1-\alpha/2} \approx 1.96$  and for an unknown estimated proportion we use  $P = 0.5$  where the term  $P(1 - P)$  reaches its maximum value. Thus, we get

$$d = 1.96 \sqrt{\frac{0.5(1 - 0.5)}{n}} = \frac{0.98}{\sqrt{n}}.$$

**Example**

If  $n = 100$  then  $d_{srs} = 0.98 / \sqrt{100} = 0.098$ .

A sample size of 100 would have a 95 % confidence interval of  $\pm 9.8$  % or less.

## Margin of error in survey data

A sample that includes complex survey design such as different sampling probabilities or cluster sampling, should account for the design effect. The design effect

$$DEFF = var(survey)/var(srs),$$

where  $var(survey)$  is the variation based on the survey design and  $var(srs)$  is the variance assuming a simple random sampling.

If the sample includes a significant amount of the total population, a finite population correction can be applied. The formula for the correction is

$$FPC = \sqrt{\frac{N - n}{N - 1}}.$$

A margin of error that accounts for design effect and finite population correction is

$$d_{survey} = z_{1-\alpha/2} \sqrt{\frac{P(1-P)}{n}} \times DEFF \times FPC$$

(Lehtonen and Pahkinen 2004).
